# Supplementary material for: Structural Genomics of SARS-CoV-2 Indicates Evolutionary Conserved Functional Regions of Viral Proteins
Source: MDPI journal article supplement (doi:10.3390/v12040360), 2020-03-25
Supplement: s1 [file s1]

**Supplementary Table S1. The closest UniProt blast search hits for 2019-nCoV proteins and their comparison with the three novel isolates of BatCoV (2013, 2015, and 2017)**

| 2019-nCov protein | UniProt ID | Virus/Strain_Isolate/Year               | Seq ID, % | 2017 BatCoV Seq ID, % | 2013 BatCoV Seq ID, % | NCBI ID 2017            | NCBI ID 2015 | NCBI ID 2013            |
|-------------------|------------|-----------------------------------------|-----------|-----------------------|-----------------------|-------------------------|--------------|-------------------------|
| wPRF1ab           | A0A166ZL34 | Bat coronavirus/JTMC15/2013             | 91.3      | 95.7                  | 98.6                  | AVP78030.1              | AVP78041.1   | QHR63299.1              |
|                   | P0C6X7     | Human SARS-CoV/Urbani/2003              | 86.2      |                       |                       |                         |              |                         |
|                   | A0A0U1WHI4 | BtRf-BetaCoV/SX2013/2013                | 85.8      |                       |                       |                         |              |                         |
| wN                | R9QTB4     | Bat coronavirus/Rp/Shaanxi2011/2011     | 91.0      | 94.3                  | 99.1                  | AVP78038.1              | AVP78049.1   | QHR63308.1              |
|                   | P59595     | Human SARS-CoV/Urbani/2003              | 90.5      |                       |                       |                         |              |                         |
|                   | A0A0U1WHI6 | BtRf-BetaCoV/SX2013/2013                | 89.8      |                       |                       |                         |              |                         |
| wORF3a            | Q0Q474     | Bat coronavirus, BtCoV/279/2005         | 74.5      | 91.0                  | 97.8                  | AVP78032.1              | AVP78043.1   | QHR63301.1              |
|                   | P59632     | Human SARS-CoV /Urbani/2003             | 72.7      |                       |                       |                         |              |                         |
|                   | A0A0U1UZ48 | BtRf-BetaCoV/SX2013/2013                | 70.9      |                       |                       |                         |              |                         |
| wE                | Q3I5J3     | Bat coronavirus, BtCoV/Rp3/2004         | 94.7      | 100.0                 | 100.0                 | AVP78033.1              | AVP78044.1   | QHR63302.1              |
|                   | P59637     | Human SARS-CoV/Urbani/2003              | 94.7      |                       |                       |                         |              |                         |
|                   | A0A0U1WJY0 | BtRf-BetaCoV/SX2013/2013                | 92.1      |                       |                       |                         |              |                         |
| wM                | Q0Q472     | Bat coronavirus, BtCoV/279/2005         | 91.7      | 98.7                  | 99.6                  | AVP78034.1              |              | QHR63303.1              |
|                   | P59596     | Human SARS-CoV/Urbani/2003              | 90.5      |                       |                       |                         |              |                         |
|                   | A0A0U1WHH9 | BtRf-BetaCoV/SX2013/2013                | 90.4      |                       |                       |                         |              |                         |
| wORF6             | Q3I5J1     | Bat coronavirus, BtCoV/Rp3/2004         | 68.9      | 93.4                  | 100.0                 | AVP78035.1              | AVP78046.1   | QHR63304.1              |
|                   | P59634     | Human SARS-CoV/Urbani/2003              | 68.9      |                       |                       |                         |              |                         |
|                   | A0A0U1WHI0 | BtRf-BetaCoV/SX2013/2013                | 68.9      |                       |                       |                         |              |                         |
| wORF7a            | Q3I5J0     | Bat coronavirus, BtCoV/Rp3/2004         | 88.5      | 88.4                  | 97.5                  | AVP78036.1              | AVP78047.1   | QHR63305.1              |
|                   | A0A0U1UZE3 | BtRf-BetaCoV/SX2013/2013                | 86.1      |                       |                       |                         |              |                         |
|                   | P59635     | Human SARS-CoV/Urbani/2003              | 85.2      |                       |                       |                         |              |                         |
| wORF7b            | Q3I5I9     | Bat coronavirus, BtCoV/Rp3/2004         | 85.7      | N/A                   | 97.7                  |                         |              | QHR63306.1              |
|                   | A0A0U1WHI9 | BtRf-BetaCoV/SX2013/2013                | 85.7      |                       |                       |                         |              |                         |
|                   | Q7TFA1     | Human SARS-CoV/Urbani/2003              | 85.4      |                       |                       |                         |              |                         |
| wORF8             | Q0Q469     | Bat coronavirus, BtCoV/279/2005         | 57.0      | 94.2                  | 95.0                  | AVP78037.1              | AVP78048.1   | QHR63307.1              |
| wS                | Q3LZX1     | Bat coronavirus, BtCoV/HKU3-1/2005      | 76.0      | 81.0                  | 97.4                  | AVP78031.1              | AVP78042.1   | QHR63300.1              |
|                   | P59594     | Human SARS-CoV/Urbani/2003              | 76.0      |                       |                       |                         |              |                         |
|                   | A0A0U1WHI6 | BtRf-BetaCoV/SX2013/2013                | 73.7      |                       |                       |                         |              |                         |
| wORF10            | FJ882928.1 | Human SARS-CoV/ExoN1 isolate P1pp1/2007 | 84.2      | 97.4                  | 100                   | MG772933.1 (translated) |              | MN996532.1 (translated) |
|                   | DQ648857.1 | Bat coronavirus, BtCoV/279/2005         | 81.6      |                       |                       |                         |              |                         |
