# Supplementary material for: Structural Genomics of SARS-CoV-2 Indicates Evolutionary Conserved Functional Regions of Viral Proteins
Source: MDPI journal article supplement (doi:10.3390/v12040360), 2020-03-25
Supplement: s1 [file s1]

|               |                  |                                                            |     |
|---------------|------------------|------------------------------------------------------------|-----|
| YP_009724390  |                  | TQSLIVNNATNVVIKVCEFQFCNDPFLGVYYHKNKSWMESEFRVYSSANNCTFEYVSQ | 173 |
| SP_P59594     | SPIKE_CVHA       | SQSVIIINNSTNVIRACNFELCDNPFFAVSKPMG----                     | 166 |
| TR_Q6UZF4     | Q6UZF4_CVHA      | SQSIIIVNNTNVIRACNFELCDNPFFAVSKPMG----                      | 166 |
| TR_Q6UFZ0     | Q6UFZ0_CVHA      | SQSVIIINNSTNVIRACNFELCDNPFFAVSKPMG----                     | 166 |
| TR_Q6JH46     | Q6JH46_CVHA      | SQSVIIINNSTNVIRACNFELCDNPFFAVSKPMG----                     | 166 |
| TR_Q69ZE4     | Q69ZE4_CVHA      | SQSIIIVNNTNVIRACNFELCDNPFFAVSKPMG----                      | 166 |
| SP_Q3LZX1     | SPIKE_BCHK3      | TQSAVINNSTHIIIRVCNFNLCKEPMYTFSR--G---                      | 170 |
| SP_Q3I5J5     | SPIKE_BCRP3      | TQSAVINNSTHIIIRVCNFNLCKEPMYTFSR--G---                      | 170 |
| SP_Q0Q475     | SPIKE_BC279      | TQSAIVNNSTHIIIRVCNFNLCKEPMYTFSK--G---                      | 170 |
| TR_R9QTAO     | R9QTA0_CVHA      | QSAAIVNNSTHILVKVCNVLCTEPMPTFSR--N---                       | 168 |
| TR_R9QTH3     | R9QTH3_CVHA      | TQSAIVNNSTHIIIRVCNFNLCKEPMYTFSR--G---                      | 170 |
| TR_A0A0K1Z074 | A0A0K1Z074_CVHA  | TQSAIVNNSTHIIIRVCYNFLCKDPMYTVA--G---                       | 170 |
| TR_A0A0U1WH16 | A0A0U1WH16_CVHA  | TQSAIVNNSTHIIIRVCYNFLCKDPMYTVA--G---                       | 168 |
| TR_A0A166ZL64 | A0A166ZL64_9NIDO | TQSALLVNNGSAITIEVCYFQFCDNPAFIISG--G---                     | 165 |
| TR_A0A0U1UYX4 | A0A0U1UYX4_CVHA  | TQSALLVNNGSAITIEVCYFQFCDNPAFIIRD--G---                     | 165 |

YP\_009724390 PFLMDLEGK-QGNFKNLREFVFNKNDIDGYFKIYSKHTPINLVR----DLPQGFSALEPLVD 228  
SP|P59594|SPIKE\_CVHSA AFSLDVSEK-SGNFKHLREFVFNKNDGFLYVYKGYQPIDVVR----DLPSPGFNTLKPIFK 221  
TR|Q6UZF4|Q6UZF4\_CVHSA AFSLDVSEK-SGNFKHLREFVFNKNDGFLYVYKGYQPIDVVR----DLPSPGFNTLKPIFK 221  
TR|Q6UZF0|Q6UZF0\_CVHSA AFSLDVSEK-SGNFKHLREFVFNKNDGFLYVYKGYQPIDVVR----DLPSPGFNTLKPIFK 221  
TR|Q6JH46|Q6JH46\_CVHSA AFSLDVSEK-SGNFKHLREFVFNKNDGFLYVYKGYQPIDVVR----DLPSPGFNTLKPIFK 221  
TR|Q692E4|Q692E4\_CVHSA AFSLDVSEK-SGNFKHLREFVFNKNDGFLYVYKGYQPIDVVR----DLPSPGFNTLKPIFK 221  
SP|Q3LZX1|SPIKE\_BCHK3 SFQLDTPK-TGNFKDLREYVFNKRDGFLSVYQTYTAVNLPR----GLPTGFSVLKPILK 225  
SP|Q3I5J5|SPIKE\_BCRP3 SFQLDTAPK-TGNFKDLREYVFNKRDGFLSVYQTYTAVNLPR----GLPIGFSVLRPILK 225  
SP|Q0Q475|SPIKE\_BC279 SFQLDTAPK-TGNFKDLREYVFNKRDGFLSVYQTYTAVNLPR----GFPAGFSVLRPILK 225  
TR|R9QTA0|R9QTA0\_CVHSA SFQLDVSLKNNVNFQHLREFIFKNVDGFLKIYSSYEPINVVS----GIPSGFSVLKPVMS 224  
TR|R9QTH3|R9QTH3\_CVHSA SFQLDTAPK-TGNFKDLREYVFNKRDGFLSVYHSYTPVDIIR----GIPVGSVLKPILK 225  
TR|A0A0K1Z074|A0A0K1Z074\_CVHSA SFQLDTAPK-SGNFIALREFVFNKRDGFFTVYQDYPVNLRLR----GLPAGLSVLKPILK 225  
TR|A0A0U1WHI6|A0A0U1WHI6\_CVHSA SFQLDTPK-TGNFTDLREFVFNKRDGFFTVYQTYTPVNLRLR----GLPSGLSVLKPILK 223  
TR|A0A166ZL64|A0A166ZL64\_9NIDO DLPLSFED-VDGGFKHLREFVFNKSDGFLHIYGAYQPYDLAIGATAALPAQFLPLKPLWK 224  
TR|A0A0U1UYX4|A0A0U1UYX4\_CVHSA DLPLSFAB-VDGGFKHLREFVFNKSDGFLHIYGAYQPYDLAIGATAALPAQFLPLKPLWK 224  
: : . \* \* \* \* : \* \* \* : \* : : : : \* : \* \* : .

YP\_009724390 LPLGINITRFTQTLALHRSYLTGPDSSSGWTAGAAAYVGYLQPRFTLLKYNENGTITDA 288  
SP|P59594|SPIKE\_CVHSA LPLGINITNFRAILTAFS-----PAQDIWGTSAAYFVGYLKPTTFMLKYDENGITITDA 275  
TR|Q6UZF4|Q6UZF4\_CVHSA LPLGINITNFRAILTAFS-----PAQDIWGTSAAYFVGYLKPTTFMLKYDENGITITDA 275  
TR|Q6UZF0|Q6UZF0\_CVHSA LPLGINITNFRAILTAFS-----PAQDIWGTSAAYFVGYLKPTTFMLKYDENGITITDA 275  
TR|Q6JH46|Q6JH46\_CVHSA LPLGINITNFRAILTAFS-----PAQDIWGTSAAYFVGYLKPTTFMLKYDENGITITDA 275  
TR|Q692E4|Q692E4\_CVHSA LPLGINITNFRAILTAFS-----PAQDTWGTSAAYFVGYLKPTTFMLKYDENGITITDA 275  
SP|Q3LZX1|SPIKE\_BCHK3 LPFGINITSYRVVMAMFS-----QTTSNFLPESAAYVGNLKYSTFMLRFNENGTITDA 279  
SP|Q3I5J5|SPIKE\_BCRP3 LPFGINITSYRVVMAMFS-----QTTSNFLPESAAYVGNLKYTTFMLSFNENGTITNA 279  
SP|Q0Q475|SPIKE\_BC279 LPFGINITSYRVVMAMFS-----QFNSNFLPESAAYVGNLKYTTFMLSFNENGTITDA 279  
TR|R9QTA0|R9QTA0\_CVHSA LPLGINITGMRVMTMFS-----NTQANFLTENAAYVGYLKPRTFMLQFNTNGTIVNA 278  
TR|R9QTH3|R9QTH3\_CVHSA LPLGINITSFVKVMTMYS-----QTTSNFLSESAAAYVGNLKYVTFMFQFNENGTITDA 279  
TR|A0A0K1Z074|A0A0K1Z074\_CVHSA LPFGINITSFVRVMMAMFS-----KTTSNYPESAAYVGNLQSTFMLSFNQNGTITDA 277  
TR|A0A0U1WHI6|A0A0U1WHI6\_CVHSA LPFGINITSFVRVMMAMFS-----KTTSNYPESAAYVGNLQSTFMLSFNQNGTIVDA 279  
TR|A0A166ZL64|A0A166ZL64\_9NIDO LPLGLNITNYKVVTTLKP-----TNQ----AFQAAAYVGNLKHMTTMLSFNENGTMSNA 274  
TR|A0A0U1UYX4|A0A0U1UYX4\_CVHSA LPLGLNITNYKVVTTLKP-----TNQ----AFQAAAYVGNLKHMTTMLSFNENGTMSNA 274  
\* \*: \* \* \* : : : : \* \* \* \* : \* : : : \* \* \* : \*

YP\_009724390 VDCALDPLSETKCTLKSFSTVEKGIYQTSNFRVQPTESIVRFPNITNLCPPFGEVFNATRFA 348  
SP|P59594|SPIKE\_CVHSA VDCSQNPLAELKCSVKSFEDKGIYQTSNFRVVPVSGDVVRFPNITNLCPPFGEVFNATKFP 335  
TR|Q6UZF4|Q6UZF4\_CVHSA VDCSQNPLAELKCSVKSFEDKGIYQTSNFRVVPVSGDVVRFPNITNLCPPFGEVFNATKFP 335  
TR|Q6UZF0|Q6UZF0\_CVHSA VDCSQNPLAELKCSVKSFEDKGIYQTSNFRVVPVSGDVVRFPNITNLCPPFGEVFNATKFP 335  
TR|Q6JH46|Q6JH46\_CVHSA VDCSQNPLAELKCSVKSFEDKGIYQTSNFRVVPVSGDVVRFPNITNLCPPFGEVFNATKFP 335  
TR|Q692E4|Q692E4\_CVHSA VDCSQNPLAELKCSVKSFEDKGIYQTSNFRVVPVSGDVVRFPNITNLCPPFGEVFNATKFP 335  
SP|Q3LZX1|SPIKE\_BCHK3 VDCSQNPLAELKCTIKNFNVDKGIYQTSNFRVSPSTQEVIRFPNITNRCPPFDKVFNATRFP 339  
SP|Q3I5J5|SPIKE\_BCRP3 IDCAQNPLAELKCTIKNFNVSKGIYQTSNFRVSPSTQEVIRFPNITNRCPPFDKVFNATRFP 339  
SP|Q0Q475|SPIKE\_BC279 VDCSQNPLAELKCTIKNFNVSKGIYQTSNFRVSPSTQEVIRFPNITNRCPPFDKVFNASRFP 339  
TR|R9QTA0|R9QTA0\_CVHSA VDCSQDPLAELKCTIKNFNITKGIYQTSNFRVSPSTQEVIRFPNITNRCPPFDKVFNATRFP 338  
TR|R9QTH3|R9QTH3\_CVHSA VDCSQNPLAELKCTLKNFNVSKGIYQTSNFRVSPSTQEVIRFPNITNRCPPFDKVFNASRFP 339  
TR|A0A0K1Z074|A0A0K1Z074\_CVHSA VDCSQNPLAELKCTTKSFNVSKGIYQTSNFRVAPVTEVVRFPNITNLCPPFDKVFNATRFP 339  
TR|A0A0U1WHI6|A0A0U1WHI6\_CVHSA VDCSQDPLAELKCTTKSFNVSKGIYQTSNFRVSPVTEVVRFPNITNLCPPFDKVFNATRFP 337  
TR|A0A166ZL64|A0A166ZL64\_9NIDO IDCSQDPLAELKCTLKQFDVGKGIYQTSNFRVQPTVDVARFPNITNRCPPFDKVFNATRFP 334  
TR|A0A0U1UYX4|A0A0U1UYX4\_CVHSA IDCSQDPLAELKCTLKQFDVGKGIYQTSNFRVQPTVDVARFPNITNRCPPFDKVFNATRFP 334  
: \* : : \* : \* \* : \* \* : \* \* : \* \* : \* \* : \* \* : \* \* : \* \* : \* \* : \* \*

YP\_009724390 SVYAWNRRKISNCVADYSVLYNSASFSTFKCYGVSPTKLNDLCFTNVYADSFVIRGDEV 408  
SP|P59594|SPIKE\_CVHSA SVYAWERKKISNCVADYSVLYNSTFFSTFKCYGVSATKLNDLCFSNVYADSFVVKGDV 395  
TR|Q6UZF4|Q6UZF4\_CVHSA SVYAWERKKISNCVADYSVLYNSTFFSTFKCYGVSATKLNDLCFSNVYADSFVVKGDV 395  
TR|Q6UZF0|Q6UZF0\_CVHSA SVYAWERKKISNCVADYSVLYNSTFFSTFKCYGVSATKLNDLCFSNVYADSFVVKGDV 395  
TR|Q6JH46|Q6JH46\_CVHSA SVYAWERKKISNCVADYSVLYNSTFFSTFKCYGVSATKLNDLCFSNVYADSFVVKGDV 395  
TR|Q692E4|Q692E4\_CVHSA SVYAWERKKISNCVADYSVLYNSTFFSTFKCYGVSATKLNDLCFSNVYADSFVVKGDV 395  
SP|Q3LZX1|SPIKE\_BCHK3 NVYAWERTKISDCVADYTVLYNSTSFSTFKCYGVSPSKLIDLCTFSVYADTFLIRSEVR 399  
SP|Q3I5J5|SPIKE\_BCRP3 NVYAWERTKISDCVADYTVLYNSTSFSTFKCYGVSPSKLIDLCTFSVYADTFLIRSEVR 399  
SP|Q0Q475|SPIKE\_BC279 NVYAWERTKISDCVADYTVLYNSTSFSTFKCYGVSPSKLIDLCTFSVYADTFLIRSEVR 399  
TR|R9QTA0|R9QTA0\_CVHSA SVYAWERTKISDCVADYTVLYNSTSFSTFKCYGVSPSKLIDLCTFSVYADTFLIRSEVR 398  
TR|R9QTH3|R9QTH3\_CVHSA SVYAWERTKISDCVADYTVLYNSTSFSTFKCYGVSPSKLIDLCTFSVYADTFLIRSEVR 399  
TR|A0A0K1Z074|A0A0K1Z074\_CVHSA SVYAWERTKISDCVADYTVFYNSTSFSTFNVCYGVSPSKLIDLCTFSVYADTFLIRFSEVR 399  
TR|A0A0U1WHI6|A0A0U1WHI6\_CVHSA SVYAWERTKISDCVADYTVFYNSTSFSTFNVCYGVSPSKLIDLCTFSVYADTFLIRFSEVR 397  
TR|A0A166ZL64|A0A166ZL64\_9NIDO SVYAWERTKISDCVADYTVFYNSTSFSTFNVCYGVSPSKLIDLCTFSVYADTFLIRFSEVR 394  
TR|A0A0U1UYX4|A0A0U1UYX4\_CVHSA SVYAWERTKISDCVADYTVFYNSTSFSTFNVCYGVSPSKLIDLCTFSVYADTFLIRFSEVR 394  
\* \* \* \* : \* : \* \* \* : \* \* \* : \* \* \* \* : \* \* \* \* : \* \* \* : \* \* \* : \*

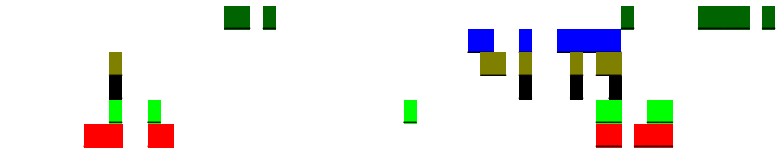

YP\_009724390  
 SP|P59594|SPIKE\_CVHSA  
 TR|Q6UZF4|Q6UZF4\_CVHSA  
 TR|Q6UZF0|Q6UZF0\_CVHSA  
 TR|Q6JH46|Q6JH46\_CVHSA  
 TR|Q692E4|Q692E4\_CVHSA  
 SP|Q3LZX1|SPIKE\_BCHK3  
 SP|Q3I5J5|SPIKE\_BCRP3  
 SP|Q0Q475|SPIKE\_BC279  
 TR|R9QTA0|R9QTA0\_CVHSA  
 TR|R9QTH3|R9QTH3\_CVHSA  
 TR|A0A0K1Z074|A0A0K1Z074\_CVHSA  
 TR|A0A0U1WHI6|A0A0U1WHI6\_CVHSA  
 TR|A0A166ZL64|A0A166ZL64\_9NIDO  
 TR|A0A0U1UYX4|A0A0U1UYX4\_CVHSA

QIAPGQGTGKIADYNYKLPDDFTGCVIAWNSNNLDSKVGNGNYLYRLFRKSNLKPFFERDI 468  
 QIAPGQGTGVIADYNYKLPDDFMGCVLAWNTRNIDATSTGNYNYKYRYLRHGKLRPFFERDI 455  
 QIAPGQGTGVIADYNYKLPDDFMGCVLAWNTRNIDATSTGNYNYKYRYLRHGKLRPFFERDI 455  
 QIAPGQGTGVIADYNYKLPDDFMGCVLAWNTRNIDATSTGNYNYKYRYLRHGKLRPFFERDI 455  
 QIAPGQGTGVIADYNYKLPDDFMGCVLAWNTRNIDATSTGNYNYKYRYLRHGKLRPFFERDI 455  
 QIAPGQGTGVIADYNYKLPDDFMGCVLAWNTRNIDATSTGNYNYKYRYLRHGKLRPFFERDI 455  
 QVAPGETGVIADYNYKLPDDFTGCVIAWNTAKHDTG-----NYYRSHRKTCLKPFFERDL 454  
 QVAPGETGVIADYNYKLPDDFTGCVIAWNTAKQDQG-----QYYRSHRKTCLKPFFERDL 454  
 QVAPGETGVIADYNYKLPDDFTGCVIAWNTAKQDQG-----QYYRSYRKEKLPFFERDL 454  
 QVAPGETGVIADYNYKLPDDFTGCVIAWNTAKQDQG-----QYYRSHRKTCLKPFFERDL 454  
 QVAPGETGVIADYNYKLPDDFTGCVIAWNTAKQDQG-----QYYRSHRKTCLKPFFERDL 453  
 QIAPGETGVIADYNYKLPDEFTGCVIAWNTAKQDRG-----QYYRSHRKTCLKPFFERDL 454  
 QVAPGQGTGVIADYNYKLPDDFTGCVIAWNTAKYDVG-----SYFYRSHRSSLKLPFFERDL 454  
 QVAPGQGTGVIADYNYKLPDDFTGCVIAWNTAKQDVG-----SYFYRSHRSSLKLPFFERDL 452  
 QVAPGQGTGVIADYNYKLPDDFTGCVIAWNTAKQDVG-----SYFYRSHRSSLKLPFFERDL 449  
 QVAPGQGTGVIADYNYKLPDDFTGCVIAWNTAKQDVG-----SYFYRSHRSSLKLPFFERDL 449

\*:\*\*\*:\* \*\*\*\*\*:\* \*\*\*:\*\*: : \* .\* \*\* \* :\*:\*\*\*\*\*:



YP\_009724390  
 SP|P59594|SPIKE\_CVHSA  
 TR|Q6UZF4|Q6UZF4\_CVHSA  
 TR|Q6UZF0|Q6UZF0\_CVHSA  
 TR|Q6JH46|Q6JH46\_CVHSA  
 TR|Q692E4|Q692E4\_CVHSA  
 SP|Q3LZX1|SPIKE\_BCHK3  
 SP|Q3I5J5|SPIKE\_BCRP3  
 SP|Q0Q475|SPIKE\_BC279  
 TR|R9QTA0|R9QTA0\_CVHSA  
 TR|R9QTH3|R9QTH3\_CVHSA  
 TR|A0A0K1Z074|A0A0K1Z074\_CVHSA  
 TR|A0A0U1WHI6|A0A0U1WHI6\_CVHSA  
 TR|A0A166ZL64|A0A166ZL64\_9NIDO  
 TR|A0A0U1UYX4|A0A0U1UYX4\_CVHSA

STEIYQAGSTPCNGVEGFNCYFPLQSYGFPQTNGVGYPYRVVLSFELLHAPATVCGPK 528  
 SNVPFSPDGKPCPTP-ALNCYWPLNDYGFYTTTGIGYQPYRVVLSFELLNAPATVCGPK 514  
 SNVPFSPDGKPCPTP-ALNCYWPLNDYGFYTTTGIGYQPYRVVLSFELLNAPATVCGPK 514  
 SNVPFSPDGKPCPTP-ALNCYWPLNDYGFYTTTGIGYQPYRVVLSFELLNAPATVCGPK 514  
 SNVPFSPDGKPCPTP-ALNCYWPLNDYGFYTTTGIGYQPYRVVLSFELLNAPATVCGPK 514  
 SNVPFSPDGKPCPTP-ALNCYWPLNDYGFYTTTGIGYQPYRVVLSFELLNAPATVCGPK 514  
 SSDD-----GNGVYTLSTYDFNPNVPVAYQATRVVLSFELLNAPATVCGPK 501  
 SSD-----ENGVRTLSTYDFYPSVPVAYQATRVVLSFELLNAPATVCGPK 500  
 SSD-----ENGVRTLSTYDFYPSIPVEYQATRVVLSFELLNAPATVCGPK 500  
 SSD-----GNGVYTLSTYDFYPSVPLDYQATRVVLSFELLNAPATVCGPK 499  
 SSD-----ENGVRTLSTYDFYPSVPLEYQATRVVLSFELLNAPATVCGPK 500  
 SSE-----ENGARTLSTYDFNQNPVLEYQATRVVLSFELLNAPATVCGPK 500  
 SSE-----ENGVRTLSTYDFNQVPLEYQATRVVLSFELLNAPATVCGPK 498  
 SSE-----ENGVRTLSTYDFNQNPVLEYQATRVVLSFELLNAPATVCGPK 495  
 SSE-----ENGVRTLSTYDFNQNPVLEYQATRVVLSFELLNAPATVCGPK 495

\*. \* .\*. \* : \*\* \*\*\*\*\*:\*\*\*\*\*



YP\_009724390  
 SP|P59594|SPIKE\_CVHSA  
 TR|Q6UZF4|Q6UZF4\_CVHSA  
 TR|Q6UZF0|Q6UZF0\_CVHSA  
 TR|Q6JH46|Q6JH46\_CVHSA  
 TR|Q692E4|Q692E4\_CVHSA  
 SP|Q3LZX1|SPIKE\_BCHK3  
 SP|Q3I5J5|SPIKE\_BCRP3  
 SP|Q0Q475|SPIKE\_BC279  
 TR|R9QTA0|R9QTA0\_CVHSA  
 TR|R9QTH3|R9QTH3\_CVHSA  
 TR|A0A0K1Z074|A0A0K1Z074\_CVHSA  
 TR|A0A0U1WHI6|A0A0U1WHI6\_CVHSA  
 TR|A0A166ZL64|A0A166ZL64\_9NIDO  
 TR|A0A0U1UYX4|A0A0U1UYX4\_CVHSA

KSTNLVKNKCVNFNFNGLTGTGVLTPSSKRFQPFQQFGRDIDATTTDAVRDPQTLEILDIT 588  
 LSTDLIKNQCVNFNFNGLTGTGVLTPSSKRFQPFQQFGRDVSDFTDSDVRDPKTSEILDIS 574  
 LSTDLIKNQCVNFNFNGLTGTGVLTPSSKRFQPFQQFGRDVSDFTDSDVRDPKTSEILDIS 574  
 LSTDLIKNQCVNFNFNGLTGTGVLTPSSKRFQPFQQFGRDVSDFTDSDVRDPKTSEILDIS 574  
 LSTDLIKNQCVNFNFNGLTGTGVLTPSSKRFQPFQQFGRDVSDFTDSDVRDPKTSEILDIS 574  
 LSTDLIKNQCVNFNFNGLTGTGVLTPSSKRFQPFQQFGRDVSDFTDSDVRDPKTSEILDIS 574  
 LSTELVKNQCVNFNFNGLKGTGVLTPSSKRFQSFQQFGRDTSDFTDSDVRDPQTLEILDIS 561  
 LSTQLVKNQCVNFNFNGLKGTGVLTPSSKRFQSFQQFGRDTSDFTDSDVRDPQTLEILDIS 560  
 LSTQLVKNQCVNFNFNGLRGTGVLTPSSKRFQSFQQFGRDTSDFTDSDVRDPQTLEILDIS 560  
 LSTTLVKNQCVNFNFNGLKGTGVLTPSSKRFQSFQQFGRDASDFTDSDVRDPQTLEILDIS 559  
 LSTSLIKNQCVNFNFNGLKGTGVLTPSSKRFQSFQQFGRDASDFTDSDVRDPQTLEILDIS 560  
 LSTSLVKNQCVNFNFNGFKGTGVLTPSSKRFQSFQQFGRDASDFTDSDVRDPKTLEILDIS 560  
 LSTSLVKNQCVNFNFNGFKGTGVLTPSSKRFQSFQQFGRDASDFTDSDVRDPKTLEILDIS 558  
 LSTPLVKNQCVNFNFNGLKGTGVLTPSSKRFQSFQQFGRDASDFTDSDVRDPQTLEILDIS 555  
 LSTPLVKNQCVNFNFNGLKGTGVLTPSSKRFQSFQQFGRDASDFTDSDVRDPQTLEILDIS 555

\*\* \*:\*\*\*:\*\*\*\*\*: \*\*\*\*\* \*. \* \*\*\*\*\* :\* \*\*:\*\*\*\*:\* .\*\*\*\*:

YP\_009724390  
SP|P59594|SPIKE\_CVHSA  
TR|Q6UZF4|Q6UZF4\_CVHSA  
TR|Q6UZF0|Q6UZF0\_CVHSA  
TR|Q6JH46|Q6JH46\_CVHSA  
TR|Q692E4|Q692E4\_CVHSA  
SP|Q3LZX1|SPIKE\_BCHK3  
SP|Q3I5J5|SPIKE\_BCRP3  
SP|Q0Q475|SPIKE\_BC279  
TR|R9QTA0|R9QTA0\_CVHSA  
TR|R9QTH3|R9QTH3\_CVHSA  
TR|A0A0K1Z074|A0A0K1Z074\_CVHSA  
TR|A0A0U1WHI6|A0A0U1WHI6\_CVHSA  
TR|A0A166ZL64|A0A166ZL64\_9NIDO  
TR|A0A0U1UYX4|A0A0U1UYX4\_CVHSA  
PCSFGGVSVITPGTNTSNQVAVLYQDVNCTEVPVAIHADQLTPTWRVYSTGNSNVFQTQAG 648  
PCSFGGVSVITPGTNASSEVAVLYQDVNCTDVSTAIHADQLTPAWRIYSTGNNVFQTQAG 634  
PCSFGGVSVITPGTNASSEVAVLYQDVNCTDVSTAIHADQLTPAWRIYSTGNNVFQTQAG 634  
PCSFGGVSVITPGTNASSEVAVLYQDVNCTDVSTAIHADQLTPAWRIYSTGNNVFQTQAG 634  
PCSFGGVSVITPGTNASSEVAVLYQDVNCTDVSTAIHADQLTPAWRIYSTGNNVFQTQAG 634  
PCSFGGVSVITPGTNASSEVAVLYQDVNCTDVPTAIRADQLTPAWRVYSTGNNVFQTQAG 621  
PCSFGGVSVITPGTNASSEVAVLYQDVNCTDVPAAIHADQLTPAWRVYSTGNNVFQTQAG 620  
PCSFGGVSVITPGTNASSEVAVLYQDVNCTDVPTSIHADQLTPAWRVYSTGNNVFQTQAG 620  
PCSFGGVSVITPGTNASTEAVLYQDVNCTDVPTAINADQLTPAWRVYSTGNNVFQTQAG 619  
PCSFGGVSVITPGTNASSEVAVLYQDVNCTDVPTAIRADQLTPAWRVYSTGNNVFQTQAG 620  
PCSFGGVSVITPGTNTSSAVAVLYQDVNCTDVPKTIHADQLAPSWRVYSTGPFVFQTQAG 620  
PCSFGGVSVITPGTNTSSAVAVLYQDVNCTDVPTTLHADQLAPSWRVYSTGPFVFQTQAG 618  
PCSFGGVSVITPGTNTSSAVAVLYQDVNCTDVPTTIHADHLTHSWRVYSTGPFVFQTQAG 615  
PCSFGGVSVITPGTNTSSAVAVLYQDVNCTDVPTTIHADHLTHSWRVYSTGPFVFQTQAG 615  
\*\*\*\*\*:\*. \*\*\*\*\*:\*. :.\*\*\*: :\*:\*: \*\*\*\*\*:

YP\_009724390  
SP|P59594|SPIKE\_CVHSA  
TR|Q6UZF4|Q6UZF4\_CVHSA  
TR|Q6UZF0|Q6UZF0\_CVHSA  
TR|Q6JH46|Q6JH46\_CVHSA  
TR|Q692E4|Q692E4\_CVHSA  
SP|Q3LZX1|SPIKE\_BCHK3  
SP|Q3I5J5|SPIKE\_BCRP3  
SP|Q0Q475|SPIKE\_BC279  
TR|R9QTA0|R9QTA0\_CVHSA  
TR|R9QTH3|R9QTH3\_CVHSA  
TR|A0A0K1Z074|A0A0K1Z074\_CVHSA  
TR|A0A0U1WHI6|A0A0U1WHI6\_CVHSA  
TR|A0A166ZL64|A0A166ZL64\_9NIDO  
TR|A0A0U1UYX4|A0A0U1UYX4\_CVHSA  
CLIGAEHVNNSEYCDIPIGAGICASYQTQTNSPRRARSVASQSIAYTMSLGAENSVAYS 708  
CLIGAEHVDTSYECDIPIGAGICASYHTVS----LLRSTSQKSIVAYTMSLGADSSIAYS 690  
CLIGAEHVDTSYECDIPIGAGICASYHTVS----LLRSTSQKSIVAYTMSLGADSSIAYS 690  
CLIGAEHVDTSYECDIPIGAGICASYHTVS----LLRSTSQKSIVAYTMSLGADSSIAYS 690  
CLIGAEHVDTSYECDIPIGAGICASYHTVS----LLRSTSQKSIVAYTMSLGADSSIAYS 690  
CLIGAEHVDTSYECDIPIGAGICASYHTVS----LLRSTSQKSIVAYTMSLGADSSIAYS 690  
CLIGAEHVNASYECDIPIGAGICASYHTAS----VLRSTGQKSIVAYTMSLGAENSIAYA 677  
CLIGAEHVNASYECDIPIGAGICASYHTAS----TLRSVGQKSIVAYTMSLGAENSIAYA 676  
CLIGAEHVNASYECDIPIGAGICASYHTAS----VLRSTGQKSIVAYTMSLGAENSIAYA 676  
CLIGAEHVNASYECDIPIGAGICASYHTAS----VLRSTGQKSIVAYTMSLGAENSIAYA 675  
CLIGAEHVNASYECDIPIGAGICASYHTAS----LLRNTGQKSIVAYTMSLGAENSIAYA 676  
CLIGAEHVNNSEYCDIPIGAGICASYHTAS----VLRSTGQKSIVAYTMSLGAENSVAYA 676  
CLIGAEHVNASYQCDIPIGAGICASYHTAS----LLRSTGQKSIVAYTMSLGAENSVAYA 674  
CLIGAEHVNASYQCDIPIGAGICASYHTAS----LLRSTGQKSIVAYTMSLGAENSVAYA 671  
CLIGAEHVNASYQCDIPIGAGICASYHTAS----LLRSTGQKSIVAYTMSLGAENSVAYA 671  
\*\*\*\*\*:\*. \*\*\*\*\*:\*. :.\*\*\*: :\*:\*: \*\*\*\*\*:

YP\_009724390  
SP|P59594|SPIKE\_CVHSA  
TR|Q6UZF4|Q6UZF4\_CVHSA  
TR|Q6UZF0|Q6UZF0\_CVHSA  
TR|Q6JH46|Q6JH46\_CVHSA  
TR|Q692E4|Q692E4\_CVHSA  
SP|Q3LZX1|SPIKE\_BCHK3  
SP|Q3I5J5|SPIKE\_BCRP3  
SP|Q0Q475|SPIKE\_BC279  
TR|R9QTA0|R9QTA0\_CVHSA  
TR|R9QTH3|R9QTH3\_CVHSA  
TR|A0A0K1Z074|A0A0K1Z074\_CVHSA  
TR|A0A0U1WHI6|A0A0U1WHI6\_CVHSA  
TR|A0A166ZL64|A0A166ZL64\_9NIDO  
TR|A0A0U1UYX4|A0A0U1UYX4\_CVHSA  
NNSIAIPTNFTISVTTTEILPVSMKTKTSVDCTMYICGDSLECSNLLLQYGSFCTQLNRALT 768  
NNTIAIPTNFSISITTEVMPVSMKTSVDCNMYICGDSLECSNLLLQYGSFCTQLNRALS 750  
NNTIAIPTNFSISITTEVMPVSMKTSVDCNMYICGDSLECSNLLLQYGSFCTQLNRALS 750  
NNTIAIPTNFSISITTEVMPVSMKTSVDCNMYICGDSLECSNLLLQYGSFCTQLNRALS 750  
NNTIAIPTNFSISITTEVMPVSMKTSVDCNMYICGDSLECSNLLLQYGSFCTQLNRALS 750  
NNTIAIPTNFSISITTEVMPVSMKTSVDCNMYICGDSLECSNLLLQYGSFCTQLNRALT 737  
NNSIAIPTNFSISVTTTEVMPVSMKTSVDCNMYICGDSLECSNLLLQYGSFCTQLNRALS 736  
NNSIAIPTNFSISVTTTEVMPVSMKTSVDCNMYICGDSLECSNLLLQYGSFCTQLNRALT 736  
NNSIAIPTNFSISVTTTEVMPVSMKTSVDCNMYICGDSLECSNLLLQYGSFCTQLNRALT 735  
NNSIAIPTNFSISVTTTEVMPVSMKTSVDCNMYICGDSLECSNLLLQYGSFCTQLNRALS 736  
NNSIAIPTNFSISVTTTEVMPVSMKTSVDCNMYICGDSLECSNLLLQYGSFCTQLNRALS 734  
NNSIAIPTNFSISVTTTEVMPVSMKTSVDCNMYICGDSLECSNLLLQYGSFCTQLNRALS 731  
NNSIAIPTNFSISVTTTEVMPVSMKTSVDCNMYICGDSLECSNLLLQYGSFCTQLNRALS 731  
\*\*:\*:\*\*\*\*\*:\*. \*\*\*\*\*:\*. \*\*\*\*\*:\*\*\*\*\*:\*\*\*\*\*:\*\*\*\*\*:\*\*\*\*\*:\*\*\*\*\*:

YP\_009724390  
SP|P59594|SPIKE\_CVHSA  
TR|Q6UZF4|Q6UZF4\_CVHSA  
TR|Q6UZF0|Q6UZF0\_CVHSA  
TR|Q6JH46|Q6JH46\_CVHSA  
TR|Q692E4|Q692E4\_CVHSA  
SP|Q3LZX1|SPIKE\_BCHK3  
SP|Q3I5J5|SPIKE\_BCRP3  
SP|Q0Q475|SPIKE\_BC279  
TR|R9QTA0|R9QTA0\_CVHSA  
TR|R9QTH3|R9QTH3\_CVHSA  
TR|A0A0K1Z074|A0A0K1Z074\_CVHSA  
TR|A0A0U1WHI6|A0A0U1WHI6\_CVHSA  
TR|A0A166ZL64|A0A166ZL64\_9NIDO  
TR|A0A0U1UYX4|A0A0U1UYX4\_CVHSA  
GIAVEQDKNTQEVFAQVKQMYKTPTLKYFGGFNFSQILPDPSKPSKRSFIEDLLFNKVTL 828  
GIAAEQDRNTREVFAQVKQMYKTPTLKYFGGFNFSQILPDPLKPTKRSFIEDLLFNKVTL 810  
GIAAEQDRNTREVFAQVKQMYKTPTLKYFGGFNFSQILPDPLKPTKRSFIEDLLFNKVTL 810  
GIAAEQDRNTREVFAQVKQMYKTPTLKYFGGFNFSQILPDPLKPTKRSFIEDLLFNKVTL 810  
GIAAEQDRNTREVFAQVKQMYKTPTLKYFGGFNFSQILPDPLKPTKRSFIEDLLFNKVTL 810  
GIAAEQDRNTREVFAQVKQMYKTPTLKYFGGFNFSQILPDPLKPTKRSFIEDLLFNKVTL 810  
GIAIEQDKNTQEVFAQVKQMYKTPTLKYFGGFNFSQILPDPSKPTKRSFIEDLLFNKVTL 797  
GIAIEQDKNTQEVFAQVKQMYKTPTLKYFGGFNFSQILPDPSKPTKRSFIEDLLFNKVTL 796  
GIAIEQDKNTQEVFAQVKQMYKTPTLKYFGGFNFSQILPDPSKPTKRSFIEDLLFNKVTL 796  
GIAIEQDKNTQEVFAQVKQMYKTPTLKYFGGFNFSQILPDPSKPTKRSFIEDLLFNKVTL 795  
GIAIEQDKNTQEVFAQVKQMYKTPTLKYFGGFNFSQILPDPSKPTKRSFIEDLLFNKVTL 796  
GIAVEQDKNTQEVFAQVKQMYKTPTLKYFGGFNFSQILPDPLKPTKRSFIEDLLFNKVTL 796  
GIAVEQDKNTQEVFAQVKQMYKTPTLKYFGGFNFSQILPDPLKPTKRSFIEDLLFNKVTL 794  
GIAVEQDKNTQEVFAQVKQMYKTPTLKYFGGFNFSQILPDPLKPTKRSFIEDLLFNKVTL 791  
GIAVEQDKNTQEVFAQVKQMYKTPTLKYFGGFNFSQILPDPLKPTKRSFIEDLLFNKVTL 791  
\*\*\* \*\*:\*:\*\*\*\*\*:\*\*\*\*\*:\*\*\*\*\*:\*\*\*\*\*:\*\*\*\*\*:\*\*\*\*\*:\*\*\*\*\*:\*\*\*\*\*:
