# Supplementary material for: Structural Genomics of SARS-CoV-2 Indicates Evolutionary Conserved Functional Regions of Viral Proteins
Source: MDPI journal article supplement (doi:10.3390/v12040360), 2020-03-25
Supplement: s1 [file s1]

**Supplementary File 3. Ligand binding sites extracted from non-SARS protein targets and mapped on the sequence of wNsp5 protein aligned with the closest homologs found in UniProt.**

**Ligand BS:**

 N-{4-[(1H-benzotriazol-1-ylacetyl)(thiophen-3-ylmethyl)amino]phenyl}thiophene-2-carboxamide (4YOI-4F4, HKU4)

 N-[4-(acetylamino)phenyl]-2-(1H-benzotriazol-1-yl)-N-[(1R)-2-(tert-butylamino)-2-oxo-1-(thiophen-3-yl)ethyl]acetamide (4YOG-4F5, HKU4)

 ADENOSINE-5-DIPHOSPHORIBOSE (4MEA-APR, HKU4)

 N-{4-[(1H-benzotriazol-1-ylacetyl)(thiophen-3-ylmethyl)amino]phenyl}benzamide (4YOJ-RFM, HKU4)

 (1R,2S)-2-{{N-([4-benzyl-1-(tert-butoxycarbonyl)piperidin-4-yl]oxy)carbonyl}-L-leucyl}amino}-1-hydroxy-3-[(3S)-2-oxopyrrolidin-3-yl]propane-1-sulfonic acid (5WKL-AVY, MERS)

 (1S,2S)-2-{{N-([2-(3-chlorophenyl)ethoxy]carbonyl)-L-leucyl}amino}-1-hydroxy-3-[(3S)-2-oxopyrrolidin-3-yl]propane-1-sulfonic acid (5WKK-AW4, MERS)

 (1R,2S)-2-{{N-([benzyloxy]carbonyl)-L-leucyl}amino}-1-hydroxy-3-[(3S)-2-oxopyrrolidin-3-yl]propane-1-sulfonic acid (5WKJ-B1S, MERS)

 (1R,2S)-2-{{N-([2-(3-chlorophenyl)ethoxy]carbonyl)-L-leucyl}amino}-1-hydroxy-3-[(3S)-2-oxopyrrolidin-3-yl]propane-1-sulfonic acid (5WKK-B3G, MERS)

 (1S,2S)-2-{{N-([4-benzyl-1-(tert-butoxycarbonyl)piperidin-4-yl]oxy)carbonyl}-L-leucyl}amino}-1-hydroxy-3-[(3S)-2-oxopyrrolidin-3-yl]propane-1-sulfonic acid (5WKL-B3J, MERS)

 (1R,2S)-2-{{N-([1-(tert-butoxycarbonyl)-4-ethylpiperidin-4-yl]oxy)carbonyl}-L-leucyl}amino}-1-hydroxy-3-[(3S)-2-oxopyrrolidin-3-yl]propane-1-sulfonic acid (5WKM-B6Y, MERS)

 (1S,2S)-2-{{N-([benzyloxy]carbonyl)-L-leucyl}amino}-1-hydroxy-3-[(3S)-2-oxopyrrolidin-3-yl]propane-1-sulfonic acid (5WKJ-K36, MERS)

 (1S,2S)-2-{{N-([1-(tert-butoxycarbonyl)-4-ethylpiperidin-4-yl]oxy)carbonyl}-L-leucyl}amino}-1-hydroxy-3-[(3S)-2-oxopyrrolidin-3-yl]propane-1-sulfonic acid (5WKM-N02, MERS)

 (S)-N-benzyl-3-((S)-2-cinnamamido-3-phenylpropanamido)-2-oxo-4-((S)-2-oxopyrrolidin-3-yl)butanamide (6FV2-D03, NL63)

 (2-{S})-4-methyl-{N}-[(2-{S}),3-{R}]-3-oxidanyl-4-oxidanylidene-1-[(3-{S})-2-oxidanylidene-3-yl]-4-[(phenylmethyl)amino]butan-2-yl]-2-[(~{E})-3-phenylprop-2-enoyl]amino]pentanamide (6FV1-E8E, NL63)

|                                |                                               |                 |      |
|--------------------------------|-----------------------------------------------|-----------------|------|
| QHN73794                       | EAACCHLAKALNDFSNSGSDVLYQPPQTSITSAVLQSGFRKMAFP | SGKVEGCMVQVTCGT | 3287 |
| SP P0C6X7 R1AB_CVHSA           | EAACCHLAKALNDFSNSGADVLYQPPQTSITSAVLQSGFRKMAFP | SGKVEGCMVQVTCGT | 3264 |
| TR Q6UZF5 Q6UZF5_CVHSA         | EAACCHLAKALNDFSNSGADVLYQPPQTSITSAVLQSGFRKMAFP | SGKVEGCMVQVTCGT | 3264 |
| TR Q6UZF1 Q6UZF1_CVHSA         | EAACCHLAKALNDFSNSGADVLYQPPQTSITSAVLQSGFRKMAFP | SGKVEGCMVQVTCGT | 3264 |
| TR Q6JH48 Q6JH48_CVHSA         | EAACCHLAKALNDFSNSGADVLYQPPQTSITSAVLQSGFRKMAFP | SGKVEGCMVQVTCGT | 3264 |
| TR Q692E6 Q692E6_CVHSA         | EAACCHLAKALNDFSNSGADVLYQPPQTSITSAVLQSGFRKMAFP | SGKVEGCMVQVTCGT | 3264 |
| TR A0A0K1YZY7 A0A0K1YZY7_CVHSA | EAACCHLAKALNDFSNSGSDVLYQPPQTSITSAVLQSGFRKMAFP | SGKVEGCMVQVTCGT | 3264 |
| SP P0C6W2 R1AB_BCHK3           | EAACCHLAKALNDFSNSGADVLYQPPQTSITSAVLQSGFRKMAFP | SGKVEGCMVQVTCGT | 3258 |
| SP P0C6W6 R1AB_BCRP3           | EAACCHLAKALNDFSNSGADVLYQPPQTSITSAVLQSGFRKMAFP | SGKVEGCMVQVTCGT | 3262 |
| SP P0C6V9 R1AB_BC279           | EAACCHLAKALNDFSNSGADVLYQPPQTSITSAVLQSGFRKMAFP | SGKVEGCMVQVTCGT | 3270 |
| TR A0A0U1WHI4 A0A0U1WHI4_CVHSA | EAACCHLAKALNDFSNSGADVLYQPPQTSITSAVLQSGFRKMAFP | SGKVEGCMVQVTCGT | 3259 |
| TR A0A0U1WHG0 A0A0U1WHG0_CVHSA | EAACCHLAKALNDFSNSGADVLYQPPQTSITSAVLQSGFRKMAFP | SGKVEGCMVQVTCGT | 3259 |
| TR A0A166ZL34 A0A166ZL34_9NIDO | EAACCHLAKALNDFSNSGADVLYQPPQTSITSAVLQSGFRKMAFP | SGKVEGCMVQVTCGT | 3066 |
| TR R9QTB2 R9QTB2_CVHSA         | EAACCHLAKALNDFSNSGADVLYQPPQTSITSAVLQSGFRKMAFP | SGKVEGCMVQVTCGT | 3256 |
| TR R9QTH2 R9QTH2_CVHSA         | EAACCHLAKALNDFSNSGSDVLYQPPQTSITSAVLQSGFRKMAFP | SGKVEGCMVQVTCGT | 3265 |
| SP P0C6U8 R1A_CVHSA            | EAACCHLAKALNDFSNSGADVLYQPPQTSITSAVLQSGFRKMAFP | SGKVEGCMVQVTCGT | 3264 |
| TR Q6JH47 Q6JH47_CVHSA         | EAACCHLAKALNDFSNSGADVLYQPPQTSITSAVLQSGFRKMAFP | SGKVEGCMVQVTCGT | 3264 |
| TR Q692E5 Q692E5_CVHSA         | EAACCHLAKALNDFSNSGADVLYQPPQTSITSAVLQSGFRKMAFP | SGKVEGCMVQVTCGT | 3264 |
| SP P0C6F8 R1A_BCHK3            | EAACCHLAKALNDFSNSGADVLYQPPQTSITSAVLQSGFRKMAFP | SGKVEGCMVQVTCGT | 3258 |
| TR A0A0K1Z0N1 A0A0K1Z0N1_CVHSA | EAACCHLAKALNDFSNSGSDVLYQPPQTSITSAVLQSGFRKMAFP | SGKVEGCMVQVTCGT | 3264 |
| SP P0C6F5 R1A_BC279            | EAACCHLAKALNDFSNSGADVLYQPPQTSITSAVLQSGFRKMAFP | SGKVEGCMVQVTCGT | 3270 |
| SP P0C6T7 R1A_BCRP3            | EAACCHLAKALNDFSNSGADVLYQPPQTSITSAVLQSGFRKMAFP | SGKVEGCMVQVTCGT | 3262 |

\*\*\*\*\*:\*\*\*\*\*:\*\*\*\*\*

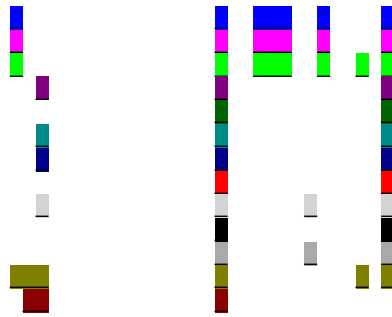

|          |            |                  |                                                              |      |
|----------|------------|------------------|--------------------------------------------------------------|------|
| QHN73794 |            |                  | TTLNGLWLDDTVYCPRHVICTSEDMLNPNYEDLLIRKSNHNFLVQAGNVQLRVIGHSMQN | 3347 |
| SP       | P0C6X7     | R1AB_CVHSA       | TTLNGLWLDDTVYCPRHVICTAEDMLNPNYEDLLIRKSNHSLVQAGNVQLRVIGHSMQN  | 3324 |
| TR       | Q6UZF5     | Q6UZF5_CVHSA     | TTLNGLWLDDTVYCPRHVICTAEDMLNPNYEDLLIRKSNHSLVQAGNVQLRVIGHSMQN  | 3324 |
| TR       | Q6UZF1     | Q6UZF1_CVHSA     | TTLNGLWLDDTVYCPRHVICTAEDMLNPNYEDLLIRKSNHSLVQAGNVQLRVIGHSMQN  | 3324 |
| TR       | Q6JH48     | Q6JH48_CVHSA     | TTLNGLWLDDTVYCPRHVICTAEDMLNPNYEDLLIRKANHSLVQAGNVQLRVIGHSMQN  | 3324 |
| TR       | Q692E6     | Q692E6_CVHSA     | TTLNGLWLDDTVYCPRHVICTAEDMLNPNYEDLLIRKSNHSLVQAGNVQLRVIGHSMQN  | 3324 |
| TR       | AOA0K1YZY7 | AOA0K1YZY7_CVHSA | TTLNGLWLDDTVYCPRHVICTAEDMLNPNYEDLLIRKSNHSLVQAGNVQLRVIGHSMQN  | 3324 |
| SP       | P0C6W2     | R1AB_BCHK3       | TTLNGLWLDDTVYCPRHVVCTAEDMLNPNYDDLIRKSNHSLVQAGNVQLRVIGHSMQN   | 3318 |
| SP       | P0C6W6     | R1AB_BCRP3       | TTLNGLWLDDTVYCPRHVICTAEDMLNPNYEDLLIRKSNHSLVQAGNVQLRVIGHSMQN  | 3322 |
| SP       | P0C6V9     | R1AB_BC279       | TTLNGLWLDDTVYCPRHVICTAEDMLNPNYEDLLIRKSNHSLVQAGNVQLRVIGHSMQN  | 3330 |
| TR       | AOA0U1WHI4 | AOA0U1WHI4_CVHSA | TTLNGLWLDDTVYCPRHVICTAEDMLNPNYEDLLIRKSNHSLVQAGNVQLRVIGHSMQN  | 3319 |
| TR       | AOA0U1WHG0 | AOA0U1WHG0_CVHSA | TTLNGLWLDDTVYCPRHVVCTVEDMLNPNYEDLLIRKSNHSLVQAGNVQLRVIGHSMQN  | 3319 |
| TR       | AOA166ZL34 | AOA166ZL34_9NIDO | TTLNGLWLDDTVYCPRHVVCTVEDMLNPNYEDLLIRKSNHSLVQAGNVQLRVIGHSMQN  | 3126 |
| TR       | R9QTB2     | R9QTB2_CVHSA     | TTLNGLWLDDTVYCPRHVICTAEDMLNPNYEDLLIRKSNHSLVQAGNVQLRVIGHSMQN  | 3316 |
| TR       | R9QTH2     | R9QTH2_CVHSA     | TTLNGLWLDDTVYCPRHVICTAEDMLNPNYEDLLIRKSNHSLVQAGNVQLRVIGHSMQN  | 3325 |
| SP       | P0C6U8     | R1A_CVHSA        | TTLNGLWLDDTVYCPRHVICTAEDMLNPNYEDLLIRKSNHSLVQAGNVQLRVIGHSMQN  | 3324 |
| TR       | Q6JH47     | Q6JH47_CVHSA     | TTLNGLWLDDTVYCPRHVICTAEDMLNPNYEDLLIRKANHSLVQAGNVQLRVIGHSMQN  | 3324 |
| TR       | Q692E5     | Q692E5_CVHSA     | TTLNGLWLDDTVYCPRHVICTAEDMLNPNYEDLLIRKSNHSLVQAGNVQLRVIGHSMQN  | 3324 |
| SP       | P0C6F8     | R1A_BCHK3        | TTLNGLWLDDTVYCPRHVVCTAEDMLNPNYDDLIRKSNHSLVQAGNVQLRVIGHSMQN   | 3318 |
| TR       | AOA0K1Z0N1 | AOA0K1Z0N1_CVHSA | TTLNGLWLDDTVYCPRHVICTAEDMLNPNYEDLLIRKSNHSLVQAGNVQLRVIGHSMQN  | 3324 |
| SP       | P0C6F5     | R1A_BC279        | TTLNGLWLDDTVYCPRHVICTAEDMLNPNYEDLLIRKSNHSLVQAGNVQLRVIGHSMQN  | 3330 |
| SP       | P0C6T7     | R1A_BCRP3        | TTLNGLWLDDTVYCPRHVICTAEDMLNPNYEDLLIRKSNHSLVQAGNVQLRVIGHSMQN  | 3322 |

\*\*\*\*\*.\*\*\*\*\*: \*\* \*\*\*\*\*:\*\*\*\*\*: \*\*.\*\*\*\*\*:\*\*\*\*\*

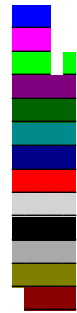

|          |            |                  |                                                              |      |
|----------|------------|------------------|--------------------------------------------------------------|------|
| QHN73794 |            |                  | CVLKLKVDTSNPKTPKYKFVRIQPQGTFSVLACYNGSPSGVYQCAMRPNHTIKGSFLNGS | 3407 |
| SP       | P0C6X7     | R1AB_CVHSA       | CLLRLKVDTSNPKTPKYKFVRIQPQGTFSVLACYNGSPSGVYQCAMRPNHTIKGSFLNGS | 3384 |
| TR       | Q6UZF5     | Q6UZF5_CVHSA     | CLLRLKVDTSNPKTPKYKFVRIQPQGTFSVLACYNGSPSGVYQCAMRPNHTIKGSFLNGS | 3384 |
| TR       | Q6UZF1     | Q6UZF1_CVHSA     | CLLRLKVDTSNPKTPKYKFVRIQPQGTFSVLACYNGSPSGVYQCAMRPNHTIKGSFLNGS | 3384 |
| TR       | Q6JH48     | Q6JH48_CVHSA     | CLLRLKVDTSNPKTPKYKFVRIQPQGTFSVLACYNGSPSGVYQCAMRPNHTIKGSFLNGS | 3384 |
| TR       | Q692E6     | Q692E6_CVHSA     | CLLRLKVDTSNPKTPKYKFVRIQPQGTFSVLACYNGSPSGVYQCAMRPNHTIKGSFLNGS | 3384 |
| TR       | AOA0K1YZY7 | AOA0K1YZY7_CVHSA | CLLRLKVDTSNPKTPKYKFVRIQPQGTFSVLACYNGSPSGVYQCAMRPNHTIKGSFLNGS | 3384 |
| SP       | P0C6W2     | R1AB_BCHK3       | CLLRLKVDTSNPKTPKYKFVRIQPQGTFSVLACYNGSPSGVYQCAMRPNHTIKGSFLNGS | 3378 |
| SP       | P0C6W6     | R1AB_BCRP3       | CLLRLKVDTSNPKTPKYKFVRIQPQGTFSVLACYNGSPSGVYQCAMRPNHTIKGSFLNGS | 3382 |
| SP       | P0C6V9     | R1AB_BC279       | CLLRLKVDTSNPKTPKYKFVRIQPQGTFSVLACYNGSPSGVYQCAMRPNHTIKGSFLNGS | 3390 |
| TR       | AOA0U1WHI4 | AOA0U1WHI4_CVHSA | CLLRLKVDTSNPKTPKYKFVRIQPQGTFSVLACYNGSPSGVYQCAMRPNHTIKGSFLNGS | 3379 |
| TR       | AOA0U1WHG0 | AOA0U1WHG0_CVHSA | CLLRLKVDTSNPKTPKYKFVRIQPQGTFSVLACYNGSPSGVYQCAMRPNHTIKGSFLNGS | 3379 |
| TR       | AOA166ZL34 | AOA166ZL34_9NIDO | CLLRLKVDTSNPKTPKYKFVRIQPQGTFSVLACYNGSPSGVYQCAMRPNHTIKGSFLNGS | 3186 |
| TR       | R9QTB2     | R9QTB2_CVHSA     | CLLRLKVDTSNPKTPKYKFVRIQPQGTFSVLACYNGSPSGVYQCAMRPNHTIKGSFLNGS | 3376 |
| TR       | R9QTH2     | R9QTH2_CVHSA     | CLLRLKVDTSNPKTPKYKFVRIQPQGTFSVLACYNGSPSGVYQCAMRPNHTIKGSFLNGS | 3385 |
| SP       | P0C6U8     | R1A_CVHSA        | CLLRLKVDTSNPKTPKYKFVRIQPQGTFSVLACYNGSPSGVYQCAMRPNHTIKGSFLNGS | 3384 |
| TR       | Q6JH47     | Q6JH47_CVHSA     | CLLRLKVDTSNPKTPKYKFVRIQPQGTFSVLACYNGSPSGVYQCAMRPNHTIKGSFLNGS | 3384 |
| TR       | Q692E5     | Q692E5_CVHSA     | CLLRLKVDTSNPKTPKYKFVRIQPQGTFSVLACYNGSPSGVYQCAMRPNHTIKGSFLNGS | 3384 |
| SP       | P0C6F8     | R1A_BCHK3        | CLLRLKVDTSNPKTPKYKFVRIQPQGTFSVLACYNGSPSGVYQCAMRPNHTIKGSFLNGS | 3378 |
| TR       | AOA0K1Z0N1 | AOA0K1Z0N1_CVHSA | CLLRLKVDTSNPKTPKYKFVRIQPQGTFSVLACYNGSPSGVYQCAMRPNHTIKGSFLNGS | 3384 |
| SP       | P0C6F5     | R1A_BC279        | CLLRLKVDTSNPKTPKYKFVRIQPQGTFSVLACYNGSPSGVYQCAMRPNHTIKGSFLNGS | 3390 |
| SP       | P0C6T7     | R1A_BCRP3        | CLLRLKVDTSNPKTPKYKFVRIQPQGTFSVLACYNGSPSGVYQCAMRPNHTIKGSFLNGS | 3382 |

\* \*:\*\*\*\*\*:\*\*\*\*\*.\*\*\*\*\*

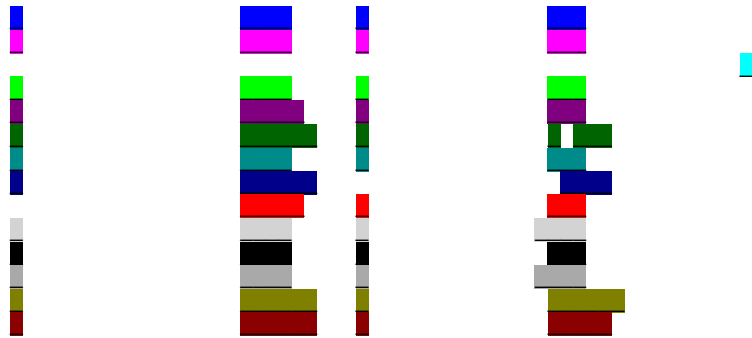

QHN73794 CGSVGFNIDYDCVSFCYMHHMELPTGVHAGTDLEGNFYGPFFVDRQTAQAAGDTTITVNV 3467  
SP P0C6X7 R1AB\_CVHSA CGSVGFNIDYDCVSFCYMHHMELPTGVHAGTDLEGKFYGPFFVDRQTAQAAGDTTITLNV 3444  
TR Q6UZF5 Q6UZF5\_CVHSA CGSVGFNIDYDCVSFCYMHHMELPTGVHAGTDLEGKFYGPFFVDRQTAQAAGDTTITLNV 3444  
TR Q6UZF1 Q6UZF1\_CVHSA CGSVGFNIDYDCVSFCYMHHMELPTGVHAGTDLEGKFYGPFFVDRQTAQAAGDTTITLNV 3444  
TR Q6JH48 Q6JH48\_CVHSA CGSVGFNIDYDCVSFCYMHHMELPTGVHAGTDLEGKFYGPFFVDRQTAQAAGDTTITLNV 3444  
TR Q692E6 Q692E6\_CVHSA CGSVGFNIDYDCVSFCYMHHMELPTGVHAGTDLEGKFYGPFFVDRQTAQAAGDTTITLNV 3444  
TR A0A0K1YZY7 A0A0K1YZY7\_CVHSA CGSVGFNIDYDCVSFCYMHHMELPTGVHAGTDLEGKFYGPFFVDRQTAQAAGDTTITLNV 3444  
SP P0C6W2 R1AB\_BCHK3 CGSVGFNIDYDCVSFCYMHHMELPTGVHAGTDLEGKFYGPFFVDRQTAQAAGDTTITLNV 3438  
SP P0C6W6 R1AB\_BCRP3 CGSVGFNIDYDCVSFCYMHHMELPTEVHAGTDLEGKFYGPFFVDRQTAQAAGDTTITLNV 3442  
SP P0C6V9 R1AB\_BC279 CGSVGFNIDYDCVSFCYMHHMELPTGVHAGTDLEGKFYGPFFVDRQTAQAAGDTTITLNV 3450  
TR A0A0U1WHI4 A0A0U1WHI4\_CVHSA CGSVGFNIDYDCVSFCYMHHMELPTGVHAGTDLEGKFYGPFFVDRQTAQAAGDTTITLNV 3439  
TR A0A0U1WHG0 A0A0U1WHG0\_CVHSA CGSVGFNIDYDCVSFCYMHHMELPTGVHAGTDLEGKFYGPFFVDRQTAQAAGDTTITLNV 3439  
TR A0A166ZL34 A0A166ZL34\_9NIDO CGSVGFNIDYDCVSFCYMHHMELPTGVHAGTDLEGKFYGPFFVDRQTAQAAGDTTITLNV 3246  
TR R9QTB2 R9QTB2\_CVHSA CGSVGFNIDYDCVSFCYMHHMELPTGVHAGTDLEGKFYGPFFVDRQTAQAAGDTTITLNV 3436  
TR R9QTH2 R9QTH2\_CVHSA CGSVGFNIDYDCVSFCYMHHMELPTGVHAGTDLEGKFYGPFFVDRQTAQAAGDTTITLNV 3445  
SP P0C6U8 R1A\_CVHSA CGSVGFNIDYDCVSFCYMHHMELPTGVHAGTDLEGKFYGPFFVDRQTAQAAGDTTITLNV 3444  
TR Q6JH47 Q6JH47\_CVHSA CGSVGFNIDYDCVSFCYMHHMELPTGVHAGTDLEGKFYGPFFVDRQTAQAAGDTTITLNV 3444  
TR Q692E5 Q692E5\_CVHSA CGSVGFNIDYDCVSFCYMHHMELPTGVHAGTDLEGKFYGPFFVDRQTAQAAGDTTITLNV 3444  
SP P0C6F8 R1A\_BCHK3 CGSVGFNIDYDCVSFCYMHHMELPTGVHAGTDLEGKFYGPFFVDRQTAQAAGDTTITLNV 3438  
TR A0A0K1Z0N1 A0A0K1Z0N1\_CVHSA CGSVGFNIDYDCVSFCYMHHMELPTGVHAGTDLEGKFYGPFFVDRQTAQAAGDTTITLNV 3444  
SP P0C6F5 R1A\_BC279 CGSVGFNIDYDCVSFCYMHHMELPTGVHAGTDLEGKFYGPFFVDRQTAQAAGDTTITLNV 3450  
SP P0C6T7 R1A\_BCRP3 CGSVGFNIDYDCVSFCYMHHMELPTEVHAGTDLEGKFYGPFFVDRQTAQAAGDTTITLNV 3442  
\*\*\*\*\*:\*\*\*\*\*:\*\*\*

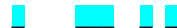

QHN73794 LAWLYAAVINGDRWFLNRFTTTLNDFNLVAMKYNIEPLTQDHVDILGPLSAQTGIAVLDM 3527  
SP P0C6X7 R1AB\_CVHSA LAWLYAAVINGDRWFLNRFTTTLNDFNLVAMKYNIEPLTQDHVDILGPLSAQTGIAVLDM 3504  
TR Q6UZF5 Q6UZF5\_CVHSA LAWLYAAVINGDRWFLNRFTTTLNDFNLVAMKYNIEPLTQDHVDILGPLSAQTGIAVLDM 3504  
TR Q6UZF1 Q6UZF1\_CVHSA LAWLYAAVINGDRWFLNRFTTTLNDFNLVAMKYNIEPLTQDHVDILGPLSAQTGIAVLDM 3504  
TR Q6JH48 Q6JH48\_CVHSA LAWLYAAVINGDRWFLNRFTTTLNDFNLVAMKYNIEPLTQDHVDILGPLSAQTGIAVLDM 3504  
TR Q692E6 Q692E6\_CVHSA LAWLYAAVINGDRWFLNRFTTTLNDFNLVAMKYNIEPLTQDHVDILGPLSAQTGIAVLDM 3504  
TR A0A0K1YZY7 A0A0K1YZY7\_CVHSA LAWLYAAVINGDRWFLNRFTTTLNDFNLVAMKYNIEPLTQDHVDILGPLSAQTGIAVLDM 3504  
SP P0C6W2 R1AB\_BCHK3 LAWLYAAVINGDRWFLNRFTTTLNDFNLVAMKYNIEPLTQDHVDILGPLSAQTGIAVLDM 3498  
SP P0C6W6 R1AB\_BCRP3 LAWLYAAVINGDRWFLNRFTTTLNDFNLVAMKYNIEPLTQDHVDILGPLSAQTGIAVLDM 3502  
SP P0C6V9 R1AB\_BC279 LAWLYAAVINGDRWFLNRFTTTLNDFNLVAMKYNIEPLTQDHVDILGPLSAQTGIAVLDM 3510  
TR A0A0U1WHI4 A0A0U1WHI4\_CVHSA LAWLYAAVINGDRWFLNRFTTTLNDFNLVAMKYNIEPLTQDHVDILGPLSAQTGIAVLDM 3499  
TR A0A0U1WHG0 A0A0U1WHG0\_CVHSA LAWLYAAVINGDRWFLNRFTTTLNDFNLVAMKYNIEPLTQDHVDILGPLSAQTGIAVLDM 3499  
TR A0A166ZL34 A0A166ZL34\_9NIDO LAWLYAAVINGDRWFLNRFTTTLNDFNLVAMKYNIEPLTQDHVDILGPLSAQTGIAVLDM 3306  
TR R9QTB2 R9QTB2\_CVHSA LAWLYAAVINGDRWFLNRFTTTLNDFNLVAMKYNIEPLTQDHVDILGPLSAQTGIAVLDM 3496  
TR R9QTH2 R9QTH2\_CVHSA LAWLYAAVINGDRWFLNRFTTTLNDFNLVAMKYNIEPLTQDHVDILGPLSAQTGIAVLDM 3505  
SP P0C6U8 R1A\_CVHSA LAWLYAAVINGDRWFLNRFTTTLNDFNLVAMKYNIEPLTQDHVDILGPLSAQTGIAVLDM 3504  
TR Q6JH47 Q6JH47\_CVHSA LAWLYAAVINGDRWFLNRFTTTLNDFNLVAMKYNIEPLTQDHVDILGPLSAQTGIAVLDM 3504  
TR Q692E5 Q692E5\_CVHSA LAWLYAAVINGDRWFLNRFTTTLNDFNLVAMKYNIEPLTQDHVDILGPLSAQTGIAVLDM 3504  
SP P0C6F8 R1A\_BCHK3 LAWLYAAVINGDRWFLNRFTTTLNDFNLVAMKYNIEPLTQDHVDILGPLSAQTGIAVLDM 3498  
TR A0A0K1Z0N1 A0A0K1Z0N1\_CVHSA LAWLYAAVINGDRWFLNRFTTTLNDFNLVAMKYNIEPLTQDHVDILGPLSAQTGIAVLDM 3504  
SP P0C6F5 R1A\_BC279 LAWLYAAVINGDRWFLNRFTTTLNDFNLVAMKYNIEPLTQDHVDILGPLSAQTGIAVLDM 3510  
SP P0C6T7 R1A\_BCRP3 LAWLYAAVINGDRWFLNRFTTTLNDFNLVAMKYNIEPLTQDHVDILGPLSAQTGIAVLDM 3502  
\*\*\*\*\*:\*\*\*\*\*

|          |                             |                                                               |      |
|----------|-----------------------------|---------------------------------------------------------------|------|
| QHN73794 |                             | CASLKELLQNGMNGRTILGSALLEDEFTPFDDVVRQCSGVTFQSAVKRTIKGTHHWLLTI  | 3587 |
| SP       | P0C6X7 R1AB_CVHSA           | CAALKELLQNGMNGRTILGSTILEDEFTPFDDVVRQCSGVTFQGKFKKIVKGTHHWMLLTF | 3564 |
| TR       | Q6UZF5 Q6UZF5_CVHSA         | CAALKELLQNGMNGRTILGSTILEDEFTPFDDVVRQCSGVTFQGKFKKIVKGTHHWMLLTF | 3564 |
| TR       | Q6UZF1 Q6UZF1_CVHSA         | CAALKELLQNGMNGRTILGSTILEDEFTPFDDVVRQCSGVTFQGKFKKIVKGTHHWMLLTF | 3564 |
| TR       | Q6JH48 Q6JH48_CVHSA         | CAALKELLQNGMNGRTILGSTILEDEFTPFDDVVRQCSGVTFQGKFKKIVKGTHHWMLLTF | 3564 |
| TR       | Q692E6 Q692E6_CVHSA         | CAALKELLQNGMNGRTILGSTILEDEFTPFDDVVRQCSGVTFQGKFKKIVKGTHHWMLLTF | 3564 |
| TR       | A0A0K1YZY7 A0A0K1YZY7_CVHSA | CAALKELLQNGMNGRTILGSTILEDEFTPFDDVVRQCSGVTFQGKFKKIVKGTHHWMLLTF | 3564 |
| SP       | P0C6W2 R1AB_BCHK3           | CAALKELLQNGMNGRTILGSTILEDEFTPFDDVVRQCSGVTFQGKFKKIVKGTHHWMLLTF | 3558 |
| SP       | P0C6W6 R1AB_BCRP3           | CAALKELLQNGMNGRTILGSTILEDEFTPFDDVVRQCSGVTFQGKFKKIVKGTHHWMLLTF | 3562 |
| SP       | P0C6V9 R1AB_BC279           | CAALKELLQNGMNGRTILGSTILEDEFTPFDDVVRQCSGVTFQGKFKKIVKGTHHWMLLTF | 3570 |
| TR       | A0A0U1WHI4 A0A0U1WHI4_CVHSA | CAALKELLQNGMNGRTILGSTILEDEFTPFDDVVRQCSGVTFQGKFKKIVKGTHHWMLLTF | 3559 |
| TR       | A0A0U1WHG0 A0A0U1WHG0_CVHSA | CAALKELLQNGMNGRTILGSTILEDEFTPFDDVVRQCSGVTFQGKFKKIVKGTHHWMLLTF | 3559 |
| TR       | A0A166ZL34 A0A166ZL34_9NIDO | CAALKELLQNGMNGRTILGSTILEDEFTPFDDVVRQCSGVTFQGKFKKIVKGTHHWMLLTF | 3366 |
| TR       | R9QTB2 R9QTB2_CVHSA         | CAALKELLQNGMNGRTILGSTILEDEFTPFDDVVRQCSGVTFQGKFKKIVKGTHHWMLLTF | 3556 |
| TR       | R9QTH2 R9QTH2_CVHSA         | CAALKELLQNGMNGRTILGSTILEDEFTPFDDVVRQCSGVTFQGKFKKIVKGTHHWMLLTF | 3565 |
| SP       | P0C6U8 R1A_CVHSA            | CAALKELLQNGMNGRTILGSTILEDEFTPFDDVVRQCSGVTFQGKFKKIVKGTHHWMLLTF | 3564 |
| TR       | Q6JH47 Q6JH47_CVHSA         | CAALKELLQNGMNGRTILGSTILEDEFTPFDDVVRQCSGVTFQGKFKKIVKGTHHWMLLTF | 3564 |
| TR       | Q692E5 Q692E5_CVHSA         | CAALKELLQNGMNGRTILGSTILEDEFTPFDDVVRQCSGVTFQGKFKKIVKGTHHWMLLTF | 3564 |
| SP       | P0C6F8 R1A_BCHK3            | CAALKELLQNGMNGRTILGSTILEDEFTPFDDVVRQCSGVTFQGKFKKIVKGTHHWMLLTF | 3558 |
| TR       | A0A0K1Z0N1 A0A0K1Z0N1_CVHSA | CAALKELLQNGMNGRTILGSTILEDEFTPFDDVVRQCSGVTFQGKFKKIVKGTHHWMLLTF | 3564 |
| SP       | P0C6F5 R1A_BC279            | CAALKELLQNGMNGRTILGSTILEDEFTPFDDVVRQCSGVTFQGKFKKIVKGTHHWMLLTF | 3570 |
| SP       | P0C6T7 R1A_BCRP3            | CAALKELLQNGMNGRTILGSTILEDEFTPFDDVVRQCSGVTFQGKFKKIVKGTHHWMLLTF | 3562 |

\*\*:\*\*\*\*\*:\*\*\*\*\*.  
 \*\*:\*\*\*\*\*:\*\*\*\*\*:
