# Supplementary material for: Structural Genomics of SARS-CoV-2 Indicates Evolutionary Conserved Functional Regions of Viral Proteins
Source: MDPI journal article supplement (doi:10.3390/v12040360), 2020-03-25
Supplement: s1 [file s1]

**Supplementary File 5. Ligand binding sites extracted from SARS protein targets and mapped on the sequence of wNsp5 protein aligned with the closest homologs found in UniProt. Shown is the second group of ligands.**

**Ligand BS:**

 ETHYL (5S,8S,11R)-8-BENZYL-5-(3-TERT-BUTOXY-3-OXOPROPYL)-3,6,9-TRIOXO-11-{[(3S)-2-  
OXOPYRROLIDIN-3-YL]METHYL}-1-PHENYL-2-OXA-4,7,10-TRIAZATETRADECAN-14-OATE (3TIU-G82, SARS)

 ETHYL (5S,8S,11R)-8-BENZYL-5-(2-TERT-BUTOXY-2-OXOETHYL)-3,6,9-TRIOXO-11-{[(3S)-2-  
OXOPYRROLIDIN-3-YL]METHYL}-1-PHENYL-2-OXA-4,7,10-TRIAZATETRADECAN-14-OATE (3TNS-G83, SARS)

 N-[(benzyloxy)carbonyl]-O-tert-butyl-L-seryl-N-[(2R)-5-ethoxy-5-oxo-1-[(3S)-2-oxopyrrolidin-  
3-yl]pentan-2-yl]-L-phenylalaninamide (3TNT-G85, SARS)

 N-[(5-METHYLISOXAZOL-3-YL)CARBONYL]-L-ALANYL-L-VALYL-N~-(1S)-4-ETHOXY-4-OXO-1-{[(3S)-2-  
OXOPYRROLIDIN-3-YL]METHYL}BUT-2-ENYL)-L-LEUCINAMIDE (1WOF-I12, SARS)

 N-[(BENZYOXY)CARBONYL]-O-(TERT-BUTYL)-L-THREONYL-3-CYCLOHEXYL-N-[(1S)-2-HYDROXY-1-[(3S)-2-  
OXOPYRROLIDIN-3-YL]METHYL}ETHYL]-L-ALANINAMIDE (2GX4-NOL, SARS)

 N-[(2S)-1-hydroxy-3-phenylpropan-2-yl]-Nalpha-[(2E)-3-phenylprop-2-enoyl]-L-  
phenylalaninamide (3SN8-S89, SARS)

 (2S)-3-(1H-imidazol-5-yl)-2-({[(3S,4aR,8aS)-2-(N-phenyl-beta-alanyl)decahydroisoquinolin-3-  
yl]methyl}amino)propanal (5C5O-SDJ, SARS)

 (2S)-3-(1H-imidazol-5-yl)-2-({[(3R,4aS,8aR)-2-(N-phenyl-beta-alanyl)decahydroisoquinolin-3-  
yl]methyl}amino)propanal (5C5N-SLH, SARS)

 4-(DIMETHYLAMINO)BENZOIC ACID (2V6N-XP1, SARS)

 N-[(benzyloxy)carbonyl]-3-[(2,2-dimethylpropanoyl)amino]-L-alanyl-N-[(1R)-4-oxo-1-[(3S)-2-  
oxopyrrolidin-3-yl]methyl}pentyl]-L-leucinamide (2ZU4-ZU3, SARS)

 N-[(benzyloxy)carbonyl]-O-tert-butyl-L-threonyl-N-[(1R)-4-cyclopropyl-4-oxo-1-[(3S)-2-  
oxopyrrolidin-3-yl]methyl}butyl]-L-leucinamide (2ZU5-ZU5, SARS)

 (5S,8S,14R)-ETHYL 11-(3-AMINO-3-OXOPROPYL)-8-BENZYL-14-HYDROXY-5-ISOBUTYL-3,6,9,12-TETRAOXO-  
1-PHENYL-2-OXA-4,7,10,11-TETRAAZAPENTADECAN-15-OATE (2GTB-AZP, SARS)

|                                |                                               |                                                                                       |      |
|--------------------------------|-----------------------------------------------|---------------------------------------------------------------------------------------|------|
| QHN73794                       |                                               |  |      |
| SP P0C6X7 R1AB_CVHSA           | EAACCHLAKALNDFSNSGSDVLYQPPQTSITSAVLQSGFRKMAFP | SGKVEGCMVQVTCGT                                                                       | 3287 |
| TR Q6UZF5 Q6UZF5_CVHSA         | EAACCHLAKALNDFSNSGADVLYQPPQTSITSAVLQSGFRKMAFP | SGKVEGCMVQVTCGT                                                                       | 3264 |
| TR Q6UZF1 Q6UZF1_CVHSA         | EAACCHLAKALNDFSNSGADVLYQPPQTSITSAVLQSGFRKMAFP | SGKVEGCMVQVTCGT                                                                       | 3264 |
| TR Q6JH48 Q6JH48_CVHSA         | EAACCHLAKALNDFSNSGADVLYQPPQTSITSAVLQSGFRKMAFP | SGKVEGCMVQVTCGT                                                                       | 3264 |
| TR Q692E6 Q692E6_CVHSA         | EAACCHLAKALNDFSNSGADVLYQPPQTSITSAVLQSGFRKMAFP | SGKVEGCMVQVTCGT                                                                       | 3264 |
| TR A0A0K1YZY7 A0A0K1YZY7_CVHSA | EAACCHLAKALNDFSNSGSDVLYQPPQTSITSAVLQSGFRKMAFP | SGKVEGCMVQVTCGT                                                                       | 3264 |
| SP P0C6W2 R1AB_BCHK3           | EAACCHLAKALNDFSNSGADVLYQPPQTSITSAVLQSGFRKMAFP | SGKVEGCMVQVTCGT                                                                       | 3258 |
| SP P0C6W6 R1AB_BCRP3           | EAACCHLAKALNDFSNSGADVLYQPPQTSITSAVLQSGFRKMAFP | SGKVEGCMVQVTCGT                                                                       | 3262 |
| SP P0C6V9 R1AB_BC279           | EAACCHLAKALNDFSNSGADVLYQPPQTSITSAVLQSGFRKMAFP | SGKVEGCMVQVTCGT                                                                       | 3270 |
| TR A0A0U1WHI4 A0A0U1WHI4_CVHSA | EAACCHLAKALNDFSNSGADVLYQPPQTSITSAVLQSGFRKMAFP | SGKVEGCMVQVTCGT                                                                       | 3259 |
| TR A0A0U1WHG0 A0A0U1WHG0_CVHSA | EAACCHLAKALNDFSNSGADVLYQPPQTSITSAVLQSGFKKVAFP | SGKVEGCMVQVTCGT                                                                       | 3259 |
| TR A0A166ZL34 A0A166ZL34_9NIDO | EAACCHLAKALNDFSNSGADVLYQPPQTSITSAVLQSGFKKMAFP | SGKVEGCMVQVTCGT                                                                       | 3066 |
| TR R9QTB2 R9QTB2_CVHSA         | EAACCHLAKALNDFSNSGADVLYQPPQTSITSAVLQSGFRKMAFP | SGKVEGCMVQVTCGT                                                                       | 3256 |
| TR R9QTH2 R9QTH2_CVHSA         | EAACCHLAKALNDFSNSGSDVLYQPPQTSITSAVLQSGFRKMAFP | SGKVEGCMVQVTCGT                                                                       | 3265 |
| SP P0C6U8 R1A_CVHSA            | EAACCHLAKALNDFSNSGADVLYQPPQTSITSAVLQSGFRKMAFP | SGKVEGCMVQVTCGT                                                                       | 3264 |
| TR Q6JH47 Q6JH47_CVHSA         | EAACCHLAKALNDFSNSGADVLYQPPQTSITSAVLQSGFRKMAFP | SGKVEGCMVQVTCGT                                                                       | 3264 |
| TR Q692E5 Q692E5_CVHSA         | EAACCHLAKALNDFSNSGADVLYQPPQTSITSAVLQSGFRKMAFP | SGKVEGCMVQVTCGT                                                                       | 3264 |
| SP P0C6F8 R1A_BCHK3            | EAACCHLAKALNDFSNSGADVLYQPPQTSITSAVLQSGFRKMAFP | SGKVEGCMVQVTCGT                                                                       | 3258 |
| TR A0A0K1Z0N1 A0A0K1Z0N1_CVHSA | EAACCHLAKALNDFSNSGSDVLYQPPQTSITSAVLQSGFRKMAFP | SGKVEGCMVQVTCGT                                                                       | 3264 |
| SP P0C6F5 R1A_BC279            | EAACCHLAKALNDFSNSGADVLYQPPQTSITSAVLQSGFRKMAFP | SGKVEGCMVQVTCGT                                                                       | 3270 |
| SP P0C6T7 R1A_BCRP3            | EAACCHLAKALNDFSNSGADVLYQPPQTSITSAVLQSGFRKMAFP | SGKVEGCMVQVTCGT                                                                       | 3262 |
|                                | *****:*****:*****                             |                                                                                       |      |



|                                |                                                              |      |
|--------------------------------|--------------------------------------------------------------|------|
| QHN73794                       | TTLNGLWLDDVVYCPRHVICTSEDMLNPNYEDLLIRKSNHNFVQAGNVQLRVIGHSMQN  | 3347 |
| SP P0C6X7 R1AB_CVHSA           | TTLNGLWLDDTVYCPRHVICTAEDMLNPNYEDLLIRKSNHSFLVQAGNVQLRVIGHSMQN | 3324 |
| TR Q6UZF5 Q6UZF5_CVHSA         | TTLNGLWLDDTVYCPRHVICTAEDMLNPNYEDLLIRKSNHSFLVQAGNVQLRVIGHSMQN | 3324 |
| TR Q6UZF1 Q6UZF1_CVHSA         | TTLNGLWLDDTVYCPRHVICTAEDMLNPNYEDLLIRKSNHSFLVQAGNVQLRVIGHSMQN | 3324 |
| TR Q6JH48 Q6JH48_CVHSA         | TTLNGLWLDDTVYCPRHVICTAEDMLNPNYEDLLIRKANHSFLVQAGNVQLRVIGHSMQN | 3324 |
| TR Q692E6 Q692E6_CVHSA         | TTLNGLWLDDTVYCPRHVICTAEDMLNPNYEDLLIRKSNHSFLVQAGNVQLRVIGHSMQN | 3324 |
| TR A0A0K1YZY7 A0A0K1YZY7_CVHSA | TTLNGLWLDDTVYCPRHVICTAEDMLNPNYEDLLIRKSNHSFLVQAGNVQLRVIGHSMQN | 3324 |
| SP P0C6W2 R1AB_BCHK3           | TTLNGLWLDDTVYCPRHVVCTAEDMLNPNYDDLIRKSNHSFLVQAGNVQLRVIGHSMQN  | 3318 |
| SP P0C6W6 R1AB_BCRP3           | TTLNGLWLDDTVYCPRHVICTAEDMLNPNYEDLLIRKSNHSFLVQAGNVQLRVIGHSMQN | 3322 |
| SP P0C6V9 R1AB_BC279           | TTLNGLWLDDTVYCPRHVICTAEDMLNPNYEDLLIRKSNHSFLVQAGNVQLRVIGHSMQN | 3330 |
| TR A0A0U1WHI4 A0A0U1WHI4_CVHSA | TTLNGLWLDDTVYCPRHVICTAEDMLNPNYEDLLIRKSNHSFLVQAGNVQLRVIGHSMQN | 3319 |
| TR A0A0U1WHG0 A0A0U1WHG0_CVHSA | TTLNGLWLDDTVYCPRHVVCTVEDMLNPNYEDLLIRKSNHSFLVQAGNVQLRVIGHSMQN | 3319 |
| TR A0A166ZL34 A0A166ZL34_9NIDO | TTLNGLWLDDTVYCPRHVVCTVEDMLNPNYEDLLIRKSNHSFLVQAGNVQLRVIGHSMQN | 3126 |
| TR R9QTB2 R9QTB2_CVHSA         | TTLNGLWLDDTVYCPRHVICTAEDMLNPNYEDLLIRKSNHSFLVQAGNVQLRVIGHSMQN | 3316 |
| TR R9QTH2 R9QTH2_CVHSA         | TTLNGLWLDDTVYCPRHVICTAEDMLNPNYEDLLIRKSNHSFLVQAGNVQLRVIGHSMQN | 3325 |
| SP P0C6U8 R1A_CVHSA            | TTLNGLWLDDTVYCPRHVICTAEDMLNPNYEDLLIRKSNHSFLVQAGNVQLRVIGHSMQN | 3324 |
| TR Q6JH47 Q6JH47_CVHSA         | TTLNGLWLDDTVYCPRHVICTAEDMLNPNYEDLLIRKANHSFLVQAGNVQLRVIGHSMQN | 3324 |
| TR Q692E5 Q692E5_CVHSA         | TTLNGLWLDDTVYCPRHVICTAEDMLNPNYEDLLIRKSNHSFLVQAGNVQLRVIGHSMQN | 3324 |
| SP P0C6F8 R1A_BCHK3            | TTLNGLWLDDTVYCPRHVVCTAEDMLNPNYDDLIRKSNHSFLVQAGNVQLRVIGHSMQN  | 3318 |
| TR A0A0K1Z0N1 A0A0K1Z0N1_CVHSA | TTLNGLWLDDTVYCPRHVICTAEDMLNPNYEDLLIRKSNHSFLVQAGNVQLRVIGHSMQN | 3324 |
| SP P0C6F5 R1A_BC279            | TTLNGLWLDDTVYCPRHVICTAEDMLNPNYEDLLIRKSNHSFLVQAGNVQLRVIGHSMQN | 3330 |
| SP P0C6T7 R1A_BCRP3            | TTLNGLWLDDTVYCPRHVICTAEDMLNPNYEDLLIRKSNHSFLVQAGNVQLRVIGHSMQN | 3322 |

\*\*\*\*\*.\*\*\*\*\*: \*\* \*\*\*\*\*:\*\*\*\*\*:\*.\*\*\*\*:\*\*\*\*\*



|                                |                                                              |      |
|--------------------------------|--------------------------------------------------------------|------|
| QHN73794                       | CVLKLKVDTSNPKTPKYKFVRIQPGQTFSVLACYNGSPSGVYQCAMRPNHTIKGSFLNGS | 3407 |
| SP P0C6X7 R1AB_CVHSA           | CLLRLKVDTSNPKTPKYKFVRIQPGQTFSVLACYNGSPSGVYQCAMRPNHTIKGSFLNGS | 3384 |
| TR Q6UZF5 Q6UZF5_CVHSA         | CLLRLKVDTSNPKTPKYKFVRIQPGQTFSVLACYNGSPSGVYQCAMRPNHTIKGSFLNGS | 3384 |
| TR Q6UZF1 Q6UZF1_CVHSA         | CLLRLKVDTSNPKTPKYKFVRIQPGQTFSVLACYNGSPSGVYQCAMRPNHTIKGSFLNGS | 3384 |
| TR Q6JH48 Q6JH48_CVHSA         | CLLRLKVDTSNPKTPKYKFVRIQPGQTFSVLACYNGSPSGVYQCAMRPNHTIKGSFLNGS | 3384 |
| TR Q692E6 Q692E6_CVHSA         | CLLRLKVDTSNPKTPKYKFVRIQPGQTFSVLACYNGSPSGVYQCAMRPNHTIKGSFLNGS | 3384 |
| TR A0A0K1YZY7 A0A0K1YZY7_CVHSA | CLLRLKVDTSNPKTPKYKFVRIQPGQTFSVLACYNGSPSGVYQCAMRPNHTIKGSFLNGS | 3384 |
| SP P0C6W2 R1AB_BCHK3           | CLLRLKVDTSNPKTPKYKFVRIQPGQTFSVLACYNGSPSGVYQCAMRPNHTIKGSFLNGS | 3378 |
| SP P0C6W6 R1AB_BCRP3           | CLLRLKVDTSNPKTPKYKFVRIQPGQTFSVLACYNGSPSGVYQCAMRPNHTIKGSFLNGS | 3382 |
| SP P0C6V9 R1AB_BC279           | CLLRLKVDTSNPKTPKYKFVRIQPGQTFSVLACYNGSPSGVYQCAMRPNHTIKGSFLNGS | 3390 |
| TR A0A0U1WHI4 A0A0U1WHI4_CVHSA | CLLRLKVDTSNPKTPKYKFVRIQPGQTFSVLACYNGSPSGVYQCAMRPNHTIKGSFLNGS | 3379 |
| TR A0A0U1WHG0 A0A0U1WHG0_CVHSA | CLLRLKVDTSNPKTPKYKFVRIQPGQTFSVLACYNGSPSGVYQCAMRPNHTIKGSFLNGS | 3379 |
| TR A0A166ZL34 A0A166ZL34_9NIDO | CLLRLKVDTSNPKTPKYKFVRIQPGQTFSVLACYNGSPSGVYQCAMRPNHTIKGSFLNGS | 3186 |
| TR R9QTB2 R9QTB2_CVHSA         | CLLRLKVDTSNPKTPKYKFVRIQPGQTFSVLACYNGSPSGVYQCAMRPNHTIKGSFLNGS | 3376 |
| TR R9QTH2 R9QTH2_CVHSA         | CLLRLKVDTSNPKTPKYKFVRIQPGQTFSVLACYNGSPSGVYQCAMRPNHTIKGSFLNGS | 3385 |
| SP P0C6U8 R1A_CVHSA            | CLLRLKVDTSNPKTPKYKFVRIQPGQTFSVLACYNGSPSGVYQCAMRPNHTIKGSFLNGS | 3384 |
| TR Q6JH47 Q6JH47_CVHSA         | CLLRLKVDTSNPKTPKYKFVRIQPGQTFSVLACYNGSPSGVYQCAMRPNHTIKGSFLNGS | 3384 |
| TR Q692E5 Q692E5_CVHSA         | CLLRLKVDTSNPKTPKYKFVRIQPGQTFSVLACYNGSPSGVYQCAMRPNHTIKGSFLNGS | 3384 |
| SP P0C6F8 R1A_BCHK3            | CLLRLKVDTSNPKTPKYKFVRIQPGQTFSVLACYNGSPSGVYQCAMRPNHTIKGSFLNGS | 3378 |
| TR A0A0K1Z0N1 A0A0K1Z0N1_CVHSA | CLLRLKVDTSNPKTPKYKFVRIQPGQTFSVLACYNGSPSGVYQCAMRPNHTIKGSFLNGS | 3384 |
| SP P0C6F5 R1A_BC279            | CLLRLKVDTSNPKTPKYKFVRIQPGQTFSVLACYNGSPSGVYQCAMRPNHTIKGSFLNGS | 3390 |
| SP P0C6T7 R1A_BCRP3            | CLLRLKVDTSNPKTPKYKFVRIQPGQTFSVLACYNGSPSGVYQCAMRPNHTIKGSFLNGS | 3382 |

\*.\*:\*\*\*\*\*:\*\*\*\*\*.\*\*\*\*\*

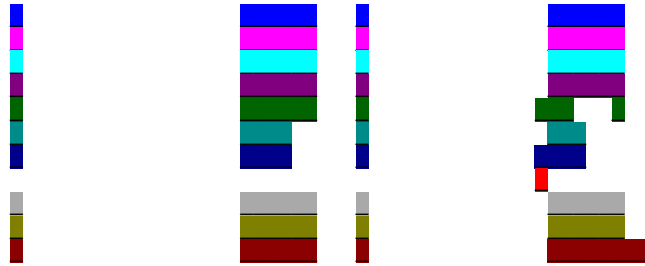

QHN73794 CGSVGFNIDYDCVSFCYMHHMELPTGVHAGTDLEGNFYGPFVDRQTAQAAGDTTITVNV 3467  
SP|P0C6X7|R1AB\_CVHSA CGSVGFNIDYDCVSFCYMHHMELPTGVHAGTDLEKFGYGPVDRQTAQAAGDTTITLNV 3444  
TR|Q6UZF5|Q6UZF5\_CVHSA CGSVGFNIDYDCVSFCYMHHMELPTGVHAGTDLEKFGYGPVDRQTAQAAGDTTITLNV 3444  
TR|Q6UZF1|Q6UZF1\_CVHSA CGSVGFNIDYDCVSFCYMHHMELPTGVHAGTDLEKFGYGPVDRQTAQAAGDTTITLNV 3444  
TR|Q6JH48|Q6JH48\_CVHSA CGSVGFNIDYDCVSFCYMHHMELPTGVHAGTDLEKFGYGPVDRQTAQAAGDTTITLNV 3444  
TR|Q692E6|Q692E6\_CVHSA CGSVGFNIDYDCVSFCYMHHMELPTGVHAGTDLEKFGYGPVDRQTAQAAGDTTITLNV 3444  
TR|A0A0K1YZY7|A0A0K1YZY7\_CVHSA CGSVGFNIDYDCVSFCYMHHMELPTGVHAGTDLEKFGYGPVDRQTAQAAGDTTITLNV 3444  
SP|P0C6W2|R1AB\_BCHK3 CGSVGFNIDYDCVSFCYMHHMELPTGVHAGTDLEKFGYGPVDRQTAQAAGDTTITLNV 3438  
SP|P0C6W6|R1AB\_BCRP3 CGSVGFNIDYDCVSFCYMHHMELPTGVHAGTDLEKFGYGPVDRQTAQAAGDTTITLNV 3442  
SP|P0C6V9|R1AB\_BC279 CGSVGFNIDYDCVSFCYMHHMELPTGVHAGTDLEKFGYGPVDRQTAQAAGDTTITLNV 3450  
TR|A0A0U1WHI4|A0A0U1WHI4\_CVHSA CGSVGFNIDYDCVSFCYMHHMELPTGVHAGTDLEKFGYGPVDRQTAQAAGDTTITLNV 3439  
TR|A0A0U1WHG0|A0A0U1WHG0\_CVHSA CGSVGFNIDYDCVSFCYMHHMELPTGVHAGTDLEKFGYGPVDRQTAQAAGDTTITLNV 3439  
TR|A0A166ZL34|A0A166ZL34\_9NIDO CGSVGFNIDYDCVSFCYMHHMELPTGVHAGTDLEKFGYGPVDRQTAQAAGDTTITLNV 3246  
TR|R9QTB2|R9QTB2\_CVHSA CGSVGFNIDYDCVSFCYMHHMELPTGVHAGTDLEKFGYGPVDRQTAQAAGDTTITLNV 3436  
TR|R9QTH2|R9QTH2\_CVHSA CGSVGFNIDYDCVSFCYMHHMELPTGVHAGTDLEKFGYGPVDRQTAQAAGDTTITLNV 3445  
SP|P0C6U8|R1A\_CVHSA CGSVGFNIDYDCVSFCYMHHMELPTGVHAGTDLEKFGYGPVDRQTAQAAGDTTITLNV 3444  
TR|Q6JH47|Q6JH47\_CVHSA CGSVGFNIDYDCVSFCYMHHMELPTGVHAGTDLEKFGYGPVDRQTAQAAGDTTITLNV 3444  
TR|Q692E5|Q692E5\_CVHSA CGSVGFNIDYDCVSFCYMHHMELPTGVHAGTDLEKFGYGPVDRQTAQAAGDTTITLNV 3444  
SP|P0C6F8|R1A\_BCHK3 CGSVGFNIDYDCVSFCYMHHMELPTGVHAGTDLEKFGYGPVDRQTAQAAGDTTITLNV 3438  
TR|A0A0K1Z0N1|A0A0K1Z0N1\_CVHSA CGSVGFNIDYDCVSFCYMHHMELPTGVHAGTDLEKFGYGPVDRQTAQAAGDTTITLNV 3444  
SP|P0C6F5|R1A\_BC279 CGSVGFNIDYDCVSFCYMHHMELPTGVHAGTDLEKFGYGPVDRQTAQAAGDTTITLNV 3450  
SP|P0C6T7|R1A\_BCRP3 CGSVGFNIDYDCVSFCYMHHMELPTGVHAGTDLEKFGYGPVDRQTAQAAGDTTITLNV 3442  
\*\*\*\*\*:\*\*\*\*\*:\*\*\*

QHN73794 LAWLYAAVINGDRWFLNRFTTTLNDFNLVAMKYNIEPLTQDHVDILGPLSAQTGIAVLDM 3527  
SP|P0C6X7|R1AB\_CVHSA LAWLYAAVINGDRWFLNRFTTTLNDFNLVAMKYNIEPLTQDHVDILGPLSAQTGIAVLDM 3504  
TR|Q6UZF5|Q6UZF5\_CVHSA LAWLYAAVINGDRWFLNRFTTTLNDFNLVAMKYNIEPLTQDHVDILGPLSAQTGIAVLDM 3504  
TR|Q6UZF1|Q6UZF1\_CVHSA LAWLYAAVINGDRWFLNRFTTTLNDFNLVAMKYNIEPLTQDHVDILGPLSAQTGIAVLDM 3504  
TR|Q6JH48|Q6JH48\_CVHSA LAWLYAAVINGDRWFLNRFTTTLNDFNLVAMKYNIEPLTQDHVDILGPLSAQTGIAVLDM 3504  
TR|Q692E6|Q692E6\_CVHSA LAWLYAAVINGDRWFLNRFTTTLNDFNLVAMKYNIEPLTQDHVDILGPLSAQTGIAVLDM 3504  
TR|A0A0K1YZY7|A0A0K1YZY7\_CVHSA LAWLYAAVINGDRWFLNRFTTTLNDFNLVAMKYNIEPLTQDHVDILGPLSAQTGIAVLDM 3504  
SP|P0C6W2|R1AB\_BCHK3 LAWLYAAVINGDRWFLNRFTTTLNDFNLVAMKYNIEPLTQDHVDILGPLSAQTGIAVLDM 3498  
SP|P0C6W6|R1AB\_BCRP3 LAWLYAAVINGDRWFLNRFTTTLNDFNLVAMKYNIEPLTQDHVDILGPLSAQTGIAVLDM 3502  
SP|P0C6V9|R1AB\_BC279 LAWLYAAVINGDRWFLNRFTTTLNDFNLVAMKYNIEPLTQDHVDILGPLSAQTGIAVLDM 3510  
TR|A0A0U1WHI4|A0A0U1WHI4\_CVHSA LAWLYAAVINGDRWFLNRFTTTLNDFNLVAMKYNIEPLTQDHVDILGPLSAQTGIAVLDM 3499  
TR|A0A0U1WHG0|A0A0U1WHG0\_CVHSA LAWLYAAVINGDRWFLNRFTTTLNDFNLVAMKYNIEPLTQDHVDILGPLSAQTGIAVLDM 3499  
TR|A0A166ZL34|A0A166ZL34\_9NIDO LAWLYAAVINGDRWFLNRFTTTLNDFNLVAMKYNIEPLTQDHVDILGPLSAQTGIAVLDM 3306  
TR|R9QTB2|R9QTB2\_CVHSA LAWLYAAVINGDRWFLNRFTTTLNDFNLVAMKYNIEPLTQDHVDILGPLSAQTGIAVLDM 3496  
TR|R9QTH2|R9QTH2\_CVHSA LAWLYAAVINGDRWFLNRFTTTLNDFNLVAMKYNIEPLTQDHVDILGPLSAQTGIAVLDM 3505  
SP|P0C6U8|R1A\_CVHSA LAWLYAAVINGDRWFLNRFTTTLNDFNLVAMKYNIEPLTQDHVDILGPLSAQTGIAVLDM 3504  
TR|Q6JH47|Q6JH47\_CVHSA LAWLYAAVINGDRWFLNRFTTTLNDFNLVAMKYNIEPLTQDHVDILGPLSAQTGIAVLDM 3504  
TR|Q692E5|Q692E5\_CVHSA LAWLYAAVINGDRWFLNRFTTTLNDFNLVAMKYNIEPLTQDHVDILGPLSAQTGIAVLDM 3504  
SP|P0C6F8|R1A\_BCHK3 LAWLYAAVINGDRWFLNRFTTTLNDFNLVAMKYNIEPLTQDHVDILGPLSAQTGIAVLDM 3498  
TR|A0A0K1Z0N1|A0A0K1Z0N1\_CVHSA LAWLYAAVINGDRWFLNRFTTTLNDFNLVAMKYNIEPLTQDHVDILGPLSAQTGIAVLDM 3504  
SP|P0C6F5|R1A\_BC279 LAWLYAAVINGDRWFLNRFTTTLNDFNLVAMKYNIEPLTQDHVDILGPLSAQTGIAVLDM 3510  
SP|P0C6T7|R1A\_BCRP3 LAWLYAAVINGDRWFLNRFTTTLNDFNLVAMKYNIEPLTQDHVDILGPLSAQTGIAVLDM 3502  
\*\*\*\*\*:\*\*\*\*\*

|          |                             |                                                               |      |
|----------|-----------------------------|---------------------------------------------------------------|------|
| QHN73794 |                             | CASLKELLQNGMNGRTILGSALLEDEFTPFDDVVRQCSGVTFQSAVKRTIKGTHHWLLTI  | 3587 |
| SP       | P0C6X7 R1AB_CVHSA           | CAALKELLQNGMNGRTILGSTILEDEFTPFDDVVRQCSGVTFQGKFKKIVKGTHHWMLLTF | 3564 |
| TR       | Q6UZF5 Q6UZF5_CVHSA         | CAALKELLQNGMNGRTILGSTILEDEFTPFDDVVRQCSGVTFQGKFKKIVKGTHHWMLLTF | 3564 |
| TR       | Q6UZF1 Q6UZF1_CVHSA         | CAALKELLQNGMNGRTILGSTILEDEFTPFDDVVRQCSGVTFQGKFKKIVKGTHHWMLLTF | 3564 |
| TR       | Q6JH48 Q6JH48_CVHSA         | CAALKELLQNGMNGRTILGSTILEDEFTPFDDVVRQCSGVTFQGKFKKIVKGTHHWMLLTF | 3564 |
| TR       | Q692E6 Q692E6_CVHSA         | CAALKELLQNGMNGRTILGSTILEDEFTPFDDVVRQCSGVTFQGKFKKIVKGTHHWMLLTF | 3564 |
| TR       | A0A0K1YZY7 A0A0K1YZY7_CVHSA | CAALKELLQNGMNGRTILGSTILEDEFTPFDDVVRQCSGVTFQGKFKKIVKGTHHWMLLTF | 3564 |
| SP       | P0C6W2 R1AB_BCHK3           | CAALKELLQNGMNGRTILGSTILEDEFTPFDDVVRQCSGVTFQGKFKKIVKGTHHWMLLTF | 3558 |
| SP       | P0C6W6 R1AB_BCRP3           | CAALKELLQNGMNGRTILGSTILEDEFTPFDDVVRQCSGVTFQGKFKKIVKGTHHWMLLTF | 3562 |
| SP       | P0C6V9 R1AB_BC279           | CAALKELLQNGMNGRTILGSTILEDEFTPFDDVVRQCSGVTFQGKFKKIVKGTHHWMLLTF | 3570 |
| TR       | A0A0U1WHI4 A0A0U1WHI4_CVHSA | CAALKELLQNGMNGRTILGSTILEDEFTPFDDVVRQCSGVTFQGKFKKIVKGTHHWMLLTF | 3559 |
| TR       | A0A0U1WHG0 A0A0U1WHG0_CVHSA | CAALKELLQNGMNGRTILGSTILEDEFTPFDDVVRQCSGVTFQGKFKKIVKGTHHWMLLTF | 3559 |
| TR       | A0A166ZL34 A0A166ZL34_9NIDO | CAALKELLQNGMNGRTILGSTILEDEFTPFDDVVRQCSGVTFQGKFKKIVKGTHHWMLLTF | 3366 |
| TR       | R9QTB2 R9QTB2_CVHSA         | CAALKELLQNGMNGRTILGSTILEDEFTPFDDVVRQCSGVTFQGKFKKIVKGTHHWMLLTF | 3556 |
| TR       | R9QTH2 R9QTH2_CVHSA         | CAALKELLQNGMNGRTILGSTILEDEFTPFDDVVRQCSGVTFQGKFKKIVKGTHHWMLLTF | 3565 |
| SP       | P0C6U8 R1A_CVHSA            | CAALKELLQNGMNGRTILGSTILEDEFTPFDDVVRQCSGVTFQGKFKKIVKGTHHWMLLTF | 3564 |
| TR       | Q6JH47 Q6JH47_CVHSA         | CAALKELLQNGMNGRTILGSTILEDEFTPFDDVVRQCSGVTFQGKFKKIVKGTHHWMLLTF | 3564 |
| TR       | Q692E5 Q692E5_CVHSA         | CAALKELLQNGMNGRTILGSTILEDEFTPFDDVVRQCSGVTFQGKFKKIVKGTHHWMLLTF | 3564 |
| SP       | P0C6F8 R1A_BCHK3            | CAALKELLQNGMNGRTILGSTILEDEFTPFDDVVRQCSGVTFQGKFKKIVKGTHHWMLLTF | 3558 |
| TR       | A0A0K1Z0N1 A0A0K1Z0N1_CVHSA | CAALKELLQNGMNGRTILGSTILEDEFTPFDDVVRQCSGVTFQGKFKKIVKGTHHWMLLTF | 3564 |
| SP       | P0C6F5 R1A_BC279            | CAALKELLQNGMNGRTILGSTILEDEFTPFDDVVRQCSGVTFQGKFKKIVKGTHHWMLLTF | 3570 |
| SP       | P0C6T7 R1A_BCRP3            | CAALKELLQNGMNGRTILGSTILEDEFTPFDDVVRQCSGVTFQGKFKKIVKGTHHWMLLTF | 3562 |

\*\*:\*\*\*\*\*:\*\*\*\*\*. .\*:\*\*\*\*\*:\*\*\*:
