# Supplementary material for: Structural Genomics of SARS-CoV-2 Indicates Evolutionary Conserved Functional Regions of Viral Proteins
Source: MDPI journal article supplement (doi:10.3390/v12040360), 2020-03-25
Supplement: s1 [file s1]

|          |            |                                                             |                                                               |      |
|----------|------------|-------------------------------------------------------------|---------------------------------------------------------------|------|
| QHN73794 |            | KWADNNCYLATALLTQQIELKFNPPALQDAYYRARAGEAANFCALILAYCNKTVGELGD | 1727                                                          |      |
| SP       | P0C6X7     | R1AB_CVHSA                                                  | KWADNNCYLSSVLLALQQLEVKFNAPALQEAYYRARAGDAANFCALILAYSNKTVGELGD  | 1704 |
| TR       | Q6UZF5     | Q6UZF5_CVHSA                                                | KWADNNCYLSSVLLALQQLEVKFNAPALQEAYYRARAGDAANFCALILAYSNKTVGELGD  | 1704 |
| TR       | Q6UZF1     | Q6UZF1_CVHSA                                                | KWADNNCYLSSVLLALQQLEVKFNAPALQEAYYRARAGDAANFCALILAYSNKTVGELGD  | 1704 |
| TR       | Q6JH48     | Q6JH48_CVHSA                                                | KWADNNCYLSSVLLALQQLEVKFNAPALQEAYYRARAGDAANFCALILAYSNKTVGELGD  | 1704 |
| TR       | Q692E6     | Q692E6_CVHSA                                                | KWADNNCYLSSVLLALQQLEVKFNAPALQEAYYRARAGDAANFCALILAYSNKTVGELGD  | 1704 |
| TR       | A0A0K1YZY7 | A0A0K1YZY7_CVHSA                                            | KWADNNCYLSSVLLALQQIEVKFNAPALQEAYYRARAGDAANFCALILAYSNKTVGELGD  | 1704 |
| SP       | P0C6W2     | R1AB_BCHK3                                                  | KWADNNCYLSSVLLALQQVEVKFNAPALQEAYYRARAGDAANFCALILAYSNKTVGELGD  | 1698 |
| SP       | P0C6W6     | R1AB_BCRP3                                                  | KWADNNCYLSSVLLALQQIEVKFNAPALQEAYYRARAGDAANFCALILAYSNKTVGELGD  | 1702 |
| SP       | P0C6V9     | R1AB_BC279                                                  | KWADNNCYLSSVLLALQQIEVKFNAPALQEAYYRARAGDAANFCALILAYSNRTVGELGD  | 1710 |
| TR       | A0A0U1WHI4 | A0A0U1WHI4_CVHSA                                            | KWADNNCYLSSVLLALQQIEVKFNAPALQEAYYRARAGDAANFCALILAYSNKTVGELGD  | 1699 |
| TR       | A0A0U1WHG0 | A0A0U1WHG0_CVHSA                                            | KWADNNCYLSSVLLALQQIEVKFNAPALQEAYYRARAGDAANFCALILAYSNKTVGELGD  | 1699 |
| TR       | A0A166ZL34 | A0A166ZL34_9NIDO                                            | KWADNNCYLSSVLLALQQIEVKFNAPALQEAYYRARAGDAANFCALTLAYSNKTVGDLGD  | 1699 |
| TR       | R9QTB2     | R9QTB2_CVHSA                                                | KWADNNCYLSSVLLALQQIEVKFNAPALQEAYYRARAGDAANFCALILAYS YKTVGELGD | 1696 |
| TR       | R9QTH2     | R9QTH2_CVHSA                                                | KWADNNCYLSSVLLALQQIEVKFNAPALQEAYYRARAGDAANFCALILAYSNKTVGELGD  | 1705 |
| SP       | P0C6U8     | R1A_CVHSA                                                   | KWADNNCYLSSVLLALQQLEVKFNAPALQEAYYRARAGDAANFCALILAYSNKTVGELGD  | 1704 |
| TR       | Q6JH47     | Q6JH47_CVHSA                                                | KWADNNCYLSSVLLALQQLEVKFNAPALQEAYYRARAGDAANFCALILAYSNKTVGELGD  | 1704 |
| TR       | Q692E5     | Q692E5_CVHSA                                                | KWADNNCYLSSVLLALQQLEVKFNAPALQEAYYRARAGDAANFCALILAYSNKTVGELGD  | 1704 |
| SP       | P0C6F8     | R1A_BCHK3                                                   | KWADNNCYLSSVLLALQQVEVKFNAPALQEAYYRARAGDAANFCALILAYSNKTVGELGD  | 1698 |
| TR       | A0A0K1Z0N1 | A0A0K1Z0N1_CVHSA                                            | KWADNNCYLSSVLLALQQIEVKFNAPALQEAYYRARAGDAANFCALILAYSNKTVGELGD  | 1704 |
| SP       | P0C6F5     | R1A_BC279                                                   | KWADNNCYLSSVLLALQQIEVKFNAPALQEAYYRARAGDAANFCALILAYSNRTVGELGD  | 1710 |
| SP       | P0C6T7     | R1A_BCRP3                                                   | KWADNNCYLSSVLLALQQIEVKFNAPALQEAYYRARAGDAANFCALILAYSNKTVGELGD  | 1702 |

QHN73794 VRETMSYLFQHANLDSCKRVLNVVCKTCGQQQTTLKGVEAVMYMGTLSEYQFKKGVIQPC 1787  
SP|P0C6X7|R1AB\_CVHSA VRETMTLLQHANLES AKRVLNVVCKHCGQKTTTLTGVEAVMYMGTLSDNLKTGVSIPC 1764  
TR|Q6UZF5|Q6UZF5\_CVHSA VRETMTLLQHANLES AKRVLNVVCKHCGQKTTTLTGVEAVMYMGTLSDNLKTGVSIPC 1764  
TR|Q6UZF1|Q6UZF1\_CVHSA VRETMTLLQHANLES AKRVLNVVCKHCGQKTTTLTGVEAVMYMGTLSDNLKTGVSIPC 1764  
TR|Q6JH48|Q6JH48\_CVHSA VRETMTLLQHANLES AKRVLNVVCKHCGQKTTTLTGVEAVMYMGTLSDNLKTGVSIPC 1764  
TR|Q692E6|Q692E6\_CVHSA VRETMTLLQHANLES AKRVLNVVCKHCGQKTTTLTGVEAVMYMGTLSDNLKTGVSIPC 1764  
TR|A0A0K1YZY7|A0A0K1YZY7\_CVHSA VRETMTLLQHANLES AKRVLNVVCKHCGQKTTTLTGVEAVMYMGTLSDNLKTGVSIPC 1764  
SP|P0C6W2|R1AB\_BCHK3 VRETMTLLQHANLES AKRVLNVVCKHCGQKTTTLKGVEAVMYMGTLSDNLKTGVSIPC 1758  
SP|P0C6W6|R1AB\_BCRP3 VRETMTLLQHANLES AKRVLNVVCKHCGQKTTTLTGVEAVMYMGTLSDNLKMGVSIPC 1762  
SP|P0C6V9|R1AB\_BC279 VRETMTLLQHANLES AKRVLNVVCKTCGQKSTTLTGVEAVMYMGTLSEELKTGV TIP 1770  
TR|A0A0U1WHI4|A0A0U1WHI4\_CVHSA VRETMTLLQHANLES AKRVLNVVCKHCGQKTTTLTGVEAVMYMGTLSDNLKTGVSIPC 1759  
TR|A0A0U1WHG0|A0A0U1WHG0\_CVHSA VRETMTLLQHANLES AKRVLNVVCKHCGQKTTTLTGVEAVMYMGTLSDNLKTGVSIPC 1759  
TR|A0A166ZL34|A0A166ZL34\_9NIDO VRETMTLLQHANLES AKRVLNVVCKHCGQKTTTLTGVEAVMYMGTLSDNLKTGVSIPC 1759  
TR|R9QTB2|R9QTB2\_CVHSA VRETMTLLQHANLES AKRVLNVVCKHCGQKTTTLTGVEAVMYMGTLSDNLKTGVSIPC 1756  
TR|R9QTH2|R9QTH2\_CVHSA VRETMAHLLQHANLES AKRVLNVVCKHCGQKTTTLTGVEAVMYMGTLSDNLKTGVSIPC 1765  
SP|P0C6U8|R1A\_CVHSA VRETMTLLQHANLES AKRVLNVVCKHCGQKTTTLTGVEAVMYMGTLSDNLKTGVSIPC 1764  
TR|Q6JH47|Q6JH47\_CVHSA VRETMTLLQHANLES AKRVLNVVCKHCGQKTTTLTGVEAVMYMGTLSDNLKTGVSIPC 1764  
TR|Q692E5|Q692E5\_CVHSA VRETMTLLQHANLES AKRVLNVVCKHCGQKTTTLTGVEAVMYMGTLSDNLKTGVSIPC 1764  
SP|P0C6F8|R1A\_BCHK3 VRETMTLLQHANLES AKRVLNVVCKHCGQKTTTLKGVEAVMYMGTLSDNLKTGVSIPC 1758  
TR|A0A0K1Z0N1|A0A0K1Z0N1\_CVHSA VRETMTLLQHANLES AKRVLNVVCKHCGQKTTTLTGVEAVMYMGTLSDNLKTGVSIPC 1764  
SP|P0C6F5|R1A\_BC279 VRETMTLLQHANLES AKRVLNVVCKTCGQKSTTLTGVEAVMYMGTLSEELKTGV TIP 1770  
SP|P0C6T7|R1A\_BCRP3 VRETMTLLQHANLES AKRVLNVVCKHCGQKTTTLTGVEAVMYMGTLSDNLKTGVSIPC 1762  
\*\*\*\*\*:\*:\*\*\*\*\*: .\*\*\*\*\*:\*\*\* \*\*\*: \*\*\*.\*\*\*\*\*:~::~\* \*\* :\*

QHN73794 TCGKQATKYLQVQESSFVMMSAPPAEYKELKHGFTTCASEYTGNYQCQGHYKHITSKETLYC 1847  
SP|P0C6X7|R1AB\_CVHSA VCGRDATQYLVQQESSFVMMSAPPAEYKELQGGTFLCANEYTGNYQCQGHYTHITAKETLYR 1824  
TR|Q6UZF5|Q6UZF5\_CVHSA VCGRDATQYLVQQESSFVMMSAPPAEYKELQGGTFLCANEYTGNYQCQGHYTHITAKETLYR 1824  
TR|Q6UZF1|Q6UZF1\_CVHSA VCGRDATQYLVQQESSFVMMSAPPAEYKELQGGTFLCANEYTGNYQCQGHYTHITAKETLYR 1824  
TR|Q6JH48|Q6JH48\_CVHSA VCGRDATQYLVQQESSFVMMSAPPAEYKELQGGTFLCANEYTGNYQCQGHYTHITAKETLYR 1824  
TR|Q692E6|Q692E6\_CVHSA VCGRDATQYLVQQESSFVMMSAPPAEYKELQGGTFLCANEYTGNYQCQGHYTHITAKETLYR 1824  
TR|A0A0K1YZY7|A0A0K1YZY7\_CVHSA VCGRDATQYLVQQESSFVMMSAPPAEYKELQGGTFLCANEYTGNYQCQGHYTHITAKETLYR 1824  
SP|P0C6W2|R1AB\_BCHK3 VCGRNATQYLVQQESSFVMMSAPPAEYKELQGGTFLCANEYTGNYQCQGHYTHITAKETLYR 1818  
SP|P0C6W6|R1AB\_BCRP3 VCGRDATQYLVQQESSFVMMSAPPAEYKELQGGTFLCANEYTGNYQCQGHYTHITAKETLYR 1822  
SP|P0C6V9|R1AB\_BC279 ICGRDATQYLVQQESSFVMMSAPPAEYKELQGGTFLCANEYTGNYQCQGHYTHITAKETLYR 1830  
TR|A0A0U1WHI4|A0A0U1WHI4\_CVHSA VCGRGAATQYLVQQESSFVMMSAPPAEYKELQGGTFLCANEYTGNYQCQGHYTHITAKETLYR 1819  
TR|A0A0U1WHG0|A0A0U1WHG0\_CVHSA VCGRDATQYLVQQESSFVMMSAPPAEYKELQGGTFLCANEYTGNYQCQGHYTHITAKETLYR 1819  
TR|A0A166ZL34|A0A166ZL34\_9NIDO VCGRDATQYLVQQESSFVMMSAPPAEYKELQGGTFLCANEYTGNYQCQGHYTHITAKETLYR 1819  
TR|R9QTB2|R9QTB2\_CVHSA VCGRNATQYLVQQESSFVMMSAPPAEYKELQGGTFLCANEYTGNYQCQGHYTHITAKETLYR 1816  
TR|R9QTH2|R9QTH2\_CVHSA VCGRDATQYLVQQESSFVMMSAPPAEYKELQGGTFLCANEYTGNYQCQGHYTHITAKETLYR 1825  
SP|P0C6U8|R1A\_CVHSA VCGRDATQYLVQQESSFVMMSAPPAEYKELQGGTFLCANEYTGNYQCQGHYTHITAKETLYR 1824  
TR|Q6JH47|Q6JH47\_CVHSA VCGRDATQYLVQQESSFVMMSAPPAEYKELQGGTFLCANEYTGNYQCQGHYTHITAKETLYR 1824  
TR|Q692E5|Q692E5\_CVHSA VCGRDATQYLVQQESSFVMMSAPPAEYKELQGGTFLCANEYTGNYQCQGHYTHITAKETLYR 1824  
SP|P0C6F8|R1A\_BCHK3 VCGRNATQYLVQQESSFVMMSAPPAEYKELQGGTFLCANEYTGNYQCQGHYTHITAKETLYR 1818  
TR|A0A0K1Z0N1|A0A0K1Z0N1\_CVHSA VCGRDATQYLVQQESSFVMMSAPPAEYKELQGGTFLCANEYTGNYQCQGHYTHITAKETLYR 1824  
SP|P0C6F5|R1A\_BC279 ICGRDATQYLVQQESSFVMMSAPPAEYKELQGGTFLCANEYTGNYQCQGHYTHITAKETLYR 1830  
SP|P0C6T7|R1A\_BCRP3 VCGRDATQYLVQQESSFVMMSAPPAEYKELQGGTFLCANEYTGNYQCQGHYTHITAKETLYR 1822  
\*\*: \*\*:~::~\* \*\* :\*

QHN73794 IDGALLTKSSEYKGPITDVIFYKENSYTTTIKPVTYKLDGVVCTEIDPKLDNYYKKDNYSYF 1907  
SP|P0C6X7|R1AB\_CVHSA IDGAHLTKMSEYKGPVTDVIFYKETSYTTTIKPVSYKLDGVVCTEIEPKLDGYYKKDNAYY 1884  
TR|Q6UZF5|Q6UZF5\_CVHSA IDGAHLTKMSEYKGPVTDVIFYKETSYTTTIKPVSYKLDGVVCTEIEPKLDGYYKKDNAYY 1884  
TR|Q6UZF1|Q6UZF1\_CVHSA IDGAHLTKMSEYKGPVTDVIFYKETSYTTTIKPVSYKLDGVVCTEIEPKLDGYYKKDNAYY 1884  
TR|Q6JH48|Q6JH48\_CVHSA IDGAHLTKMSEYKGPVTDVIFYKETSYTTTIKPVSYKLDGVVCTEIEPKLDGYYKKDNAYY 1884  
TR|Q692E6|Q692E6\_CVHSA IDGAHLTKMSEYKGPVTDVIFYKETSYTTTIKPVSYKLDGVVCTEIEPKLDGYYKKDNAYY 1884  
TR|A0A0K1YZY7|A0A0K1YZY7\_CVHSA IDGAHLTKMSEYKGPVTDVIFYKETSYTTTIKPVSYKLDGVVCTEIEPKLDGYYKKDNAYY 1884  
SP|P0C6W2|R1AB\_BCHK3 VDG AHLTKMSEYKGPVTDVIFYKETSYT TAIKPVSYKLDGVVCTEIEPKLDGYYKKGNAYY 1878  
SP|P0C6W6|R1AB\_BCRP3 IDGAHLTKMSEYKGPVTDVIFYKETSYTTTIKPVSYKLDGVVCTEIEPKLDGYYKKDNAYY 1882  
SP|P0C6V9|R1AB\_BC279 IDGAYLTKMSEYKGPVTDVIFYKEISYTTTIKPVSYKLDGVIYTEIQPKLDEYYKKDNAYY 1890  
TR|A0A0U1WHI4|A0A0U1WHI4\_CVHSA IDGAHLTKMSEYKGPVTDVIFYKETSYTTTIKPVSYKLDGVVCTEIEPKLDGYYKKDNAYY 1879  
TR|A0A0U1WHG0|A0A0U1WHG0\_CVHSA IDGAHLTKMSEYKGPVTDVIFYKETSYTTTIKPVSYKLDGVVCTEIEPKLDGYYKKDNAYY 1879  
TR|A0A166ZL34|A0A166ZL34\_9NIDO IDGAHLTKMSEYKGPVTDVIFYKETSYTTTIKPVSYKLDGVVCTEIEPKLDGYYKKDNAYY 1878  
TR|R9QTB2|R9QTB2\_CVHSA IDGAHLTKMSEYKGPVTDVIFYKETSYTTTIKPVSYKLDGVVCTEIEPKLDGYYKKDNAYY 1876  
TR|R9QTH2|R9QTH2\_CVHSA IDGAHLTKMSEYKGPVTDVIFYKETSYTTTIKPVSYKLDGVVCTEIEPKLDGYYKKDNAYY 1885  
SP|P0C6U8|R1A\_CVHSA IDGAHLTKMSEYKGPVTDVIFYKETSYTTTIKPVSYKLDGVVCTEIEPKLDGYYKKDNAYY 1884  
TR|Q6JH47|Q6JH47\_CVHSA IDGAHLTKMSEYKGPVTDVIFYKETSYTTTIKPVSYKLDGVVCTEIEPKLDGYYKKDNAYY 1884  
TR|Q692E5|Q692E5\_CVHSA IDGAHLTKMSEYKGPVTDVIFYKETSYTTTIKPVSYKLDGVVCTEIEPKLDGYYKKDNAYY 1884  
SP|P0C6F8|R1A\_BCHK3 VDG AHLTKMSEYKGPVTDVIFYKETSYT TAIKPVSYKLDGVVCTEIEPKLDGYYKKGNAYY 1878  
TR|A0A0K1Z0N1|A0A0K1Z0N1\_CVHSA IDGAHLTKMSEYKGPVTDVIFYKETSYTTTIKPVSYKLDGVVCTEIEPKLDGYYKKDNAYY 1884  
SP|P0C6F5|R1A\_BC279 IDGAYLTKMSEYKGPVTDVIFYKEISYTTTIKPVSYKLDGVIYTEIQPKLDEYYKKDNAYY 1890  
SP|P0C6T7|R1A\_BCRP3 IDGAHLTKMSEYKGPVTDVIFYKETSYTTTIKPVSYKLDGVVCTEIEPKLDGYYKKDNAYY 1882  
:\*\*\* \*\* \*\*\*\*\*:\*\*\*\*\* \*\*\*\*\*:\*\*\*\*\* \*\*\*\*\*:\*\*\*\*\* \*\*\*\*\*:~::~\* \*\* :\*
