# Supplementary material for: Structural Genomics of SARS-CoV-2 Indicates Evolutionary Conserved Functional Regions of Viral Proteins
Source: MDPI journal article supplement (doi:10.3390/v12040360), 2020-03-25
Supplement: s1 [file s1]

### Intra-Viral Heteromeric Interaction Protein Binding Sites:

[illegible]





|                         |                             |                                                              |      |
|-------------------------|-----------------------------|--------------------------------------------------------------|------|
| QHN73794                |                             | TVCTVCGMWKGYGCSCDQLREPLMQSADAQSFNLRVCGVSAARLTPCGTGTSTDVVYRAF | 4427 |
| SP                      | P0C6X7 R1AB_CVHSA           | TVCTVCGMWKGYGCSCDQLREPLMQSADASTFLNRVCGVSAARLTPCGTGTSTDVVYRAF | 4404 |
| TR                      | Q6UZF5 Q6UZF5_CVHSA         | TVCTVCGMWKGYGCSCDQLREPLMQSADASTFLNRVCGVSAARLTPCGTGTSTDVVYRAF | 4404 |
| TR                      | Q6UZF1 Q6UZF1_CVHSA         | TVCTVCGMWKGYGCSCDQLREPLMQSADASTFLNRVCGVSAARLTPCGTGTSTDVVYRAF | 4404 |
| TR                      | Q6JH48 Q6JH48_CVHSA         | TVCTVCGMWKGYGCSCDQLREPLMQSADASTFLNRVCGVSAARLTPCGTGTSTDVVYRAF | 4404 |
| TR                      | Q692E6 Q692E6_CVHSA         | TVCTVCGMWKGYGCSCDQLREPLMQSADASTFFKRVCGVSAARLTPCGTGTSTDVVYRAF | 4404 |
| TR                      | A0A0K1YZY7 A0A0K1YZY7_CVHSA | TVCTVCGMWKGYGCSCDQLREPLMQSADASTFLNRVCGVSAARLTPCGTGTSTDVVYRAF | 4404 |
| SP                      | P0C6W2 R1AB_BCHK3           | TVCTVCGMWKGYGCSCDQLREPLMQSADASTFLNRVCGVSAARLTPCGTGTSTDVVYRAF | 4398 |
| SP                      | P0C6W6 R1AB_BCRP3           | TVCTVCGMWKGYGCSCDQLREPLMQSADASTFLNRVCGVSAARLTPCGTGTSTDVVYRAF | 4402 |
| SP                      | P0C6V9 R1AB_BC279           | TVCTVCGTWKGYGCSCDQLREPLMQSADASTFLNRVCGVSAARLTPCGTGTSTDVVYRAF | 4410 |
| TR                      | A0A0U1WHI4 A0A0U1WHI4_CVHSA | TVCTVCGMWKGYGCSCDQLREPLMQSADASTFLNRVCGVSAARLTPCGTGTSTDVVYRAF | 4399 |
| TR                      | A0A0U1WHG0 A0A0U1WHG0_CVHSA | TVCTVCGMWKGYGCSCDQLREPLMQSADASTFLNRVCGVSAARLTPCGTGTSTDVVYRAF | 4399 |
| TR                      | A0A166ZL34 A0A166ZL34_9NIDO | TVCTVCGMWKGYGCSCDQLREPLMQSADASTFLNRVCGVSAARLTPCGTGTSTDVVYRAF | 4206 |
| TR                      | R9QTB2 R9QTB2_CVHSA         | TVCTVCGMWKGYGCSCDQLREPLMQSADASTFLNGFAV-----                  | 4374 |
| TR                      | R9QTH2 R9QTH2_CVHSA         | TVCTVCGMWKGYGCSCDQLREPLMQSADASTFLNGFAV-----                  | 4383 |
| SP                      | P0C6U8 R1A_CVHSA            | TVCTVCGMWKGYGCSCDQLREPLMQSADASTFLNGFAV-----                  | 4382 |
| TR                      | Q6JH47 Q6JH47_CVHSA         | TVCTVCGMWKGYGCSCDQLREPLMQSADASTFLNGFAV-----                  | 4382 |
| TR                      | Q692E5 Q692E5_CVHSA         | TVCTVCGMWKGYGCSCDQLREPLMQSADASTFLNGFAV-----                  | 4382 |
| SP                      | P0C6F8 R1A_BCHK3            | TVCTVCGMWKGYGCSCDQLREPLMQSADASTFLNGFAV-----                  | 4376 |
| TR                      | A0A0K1Z0N1 A0A0K1Z0N1_CVHSA | TVCTVCGMWKGYGCSCDQLREPLMQSADASTFLNGFAV-----                  | 4382 |
| SP                      | P0C6F5 R1A_BC279            | TVCTVCGTWKGYGCSCDQLREPLMQSADASTFLNGFAV-----                  | 4388 |
| SP                      | P0C6T7 R1A_BCRP3            | TVCTVCGMWKGYGCSCDQLREPLMQSADASTFLNGFAV-----                  | 4380 |
| ***** *****:*****. *:.. |                             |                                                              |      |

|          |                             |                                                                |      |
|----------|-----------------------------|----------------------------------------------------------------|------|
| QHN73794 |                             | DIYNKDVAGFAKFLKTNCCRFQEKDEEDNLLIDSYFVVKRHTFSNYQHEETIYNLLKDCPA  | 4487 |
| SP       | P0C6X7 R1AB_CVHSA           | DIYNEKVAGFAKFLKTNCCRFQEKDEEGNLLDSYFVVKRHTMSNYQHEETIYNLVKDCPA   | 4464 |
| TR       | Q6UZF5 Q6UZF5_CVHSA         | DIYNEKVAGFAKFLKTNCCRFQEKDEEGNLLDSYFVVKRHTMSNYQHEETIYNLVKDCPA   | 4464 |
| TR       | Q6UZF1 Q6UZF1_CVHSA         | DIYNEKVAGFAKFLKTNCCRFQEKDEEGNLLDSYFVVKRHTMSNYQHEETIYNLVKDCPA   | 4464 |
| TR       | Q6JH48 Q6JH48_CVHSA         | DIYNEKVAGFAKFLKTNCCRFQEKDEEGNLLDSYFVVKRHTMSNYQHEETIYNLVKDCPA   | 4464 |
| TR       | Q692E6 Q692E6_CVHSA         | DIYNEKVAGFAKFLKTNCCRFQEKDEEGNLLDSYFVVKRHTMSNYQHEETIYNLVKDCPA   | 4464 |
| TR       | A0A0K1YZY7 A0A0K1YZY7_CVHSA | DIYNEKVAGFAKFLKTNCCRFQEKDEEGNLLDSYFVVKRHTMSNYQHEETIYNLVKDCPA   | 4464 |
| SP       | P0C6W2 R1AB_BCHK3           | DIYNEKVAGFAKFLKTNCCRFQEKDEEGNLLDSYFVVKRHTMSNYQHEETIYNLVKECPA   | 4458 |
| SP       | P0C6W6 R1AB_BCRP3           | DIYNEKVAGFAKFLKTNCCRFQEKDEEGNLLDSYFVVKRHTMSNYQHEETIYNLVKDCPA   | 4462 |
| SP       | P0C6V9 R1AB_BC279           | DIYNERVAGFAKFLKTNCCRFQEKDEEGNLLDSYFVVKRHTMSNYQHEETIYNLVKECPA   | 4470 |
| TR       | A0A0U1WHI4 A0A0U1WHI4_CVHSA | DIYNEKVAGFAKFLKTNCCRFQEKDEEGNLLDSYFVVKRHTMSNYQHEEAIYNLLKECPA   | 4459 |
| TR       | A0A0U1WHG0 A0A0U1WHG0_CVHSA | DIYNEKVAGFAKFLKTNCCRFQEMDEEDGNLLIDSYFVVKRHTMSNYQHEEAIYNLLKECPA | 4459 |
| TR       | A0A166ZL34 A0A166ZL34_9NIDO | DIYNEKVAGFAKFLKTNCCRFQEMDEEDGNLLIDSYFVVKRHTMSNYQHEEAIYNLLKECPA | 4266 |
| TR       | R9QTB2 R9QTB2_CVHSA         | -----                                                          |      |
| TR       | R9QTH2 R9QTH2_CVHSA         | -----                                                          |      |
| SP       | P0C6U8 R1A_CVHSA            | -----                                                          |      |
| TR       | Q6JH47 Q6JH47_CVHSA         | -----                                                          |      |
| TR       | Q692E5 Q692E5_CVHSA         | -----                                                          |      |
| SP       | P0C6F8 R1A_BCHK3            | -----                                                          |      |
| TR       | A0A0K1Z0N1 A0A0K1Z0N1_CVHSA | -----                                                          |      |
| SP       | P0C6F5 R1A_BC279            | -----                                                          |      |
| SP       | P0C6T7 R1A_BCRP3            | -----                                                          |      |

|          |                             |                                                            |      |
|----------|-----------------------------|------------------------------------------------------------|------|
| QHN73794 |                             | VAKHDFKFRVDGDMVPHISRQLTKYTMADLVYALRHFDEGNCDTLKEILVTYNCCDDD | 4547 |
| SP       | P0C6X7 R1AB_CVHSA           | VAVHDFKFRVDGDMVPHISRQLTKYTMADLVYALRHFDEGNCDTLKEILVTYNCCDDD | 4524 |
| TR       | Q6UZF5 Q6UZF5_CVHSA         | VAVHDFKFRVDGDMVPHISRQLTKYTMADLVYALRHFDEGNCDTLKEILVTYNCCDDD | 4524 |
| TR       | Q6UZF1 Q6UZF1_CVHSA         | VAVHDFKFRVDGDMVPHISRQLTKYTMADLVYALRHFDEGNCDTLKEILVTYNCCDDD | 4524 |
| TR       | Q6JH48 Q6JH48_CVHSA         | VAVHDFKFRVDGDMVPHISRQLTKYTMADLVYALRHFDEGNCDTLKEILVTYNCCDDD | 4524 |
| TR       | Q692E6 Q692E6_CVHSA         | VAVHDFKFRVDGDMVPHISRQLTKYTMADLVYALRHFDEGNCDTLKEILVTYNCCDDD | 4524 |
| TR       | A0A0K1YZY7 A0A0K1YZY7_CVHSA | VAVHDFKFRVDGDMVPHISRQLTKYTMADLVYALRHFDEGNCDTLKEILVTYNCCDDD | 4524 |
| SP       | P0C6W2 R1AB_BCHK3           | VAVHDFKFRVDGDMVPHISRQLTKYTMADLVYALRHFDEGNCDTLKEILVTYNCCDDN | 4518 |
| SP       | P0C6W6 R1AB_BCRP3           | VAVHDFKFRVDGDMVPHISRQLTKYTMADLVYALRHFDEGNCDTLKEILVTYNCCDDD | 4522 |
| SP       | P0C6V9 R1AB_BC279           | VAVHDFKFRVDGDMVPHISRQLTKYTMADLVYALRHFDEGNCDTLKEILVTYNCCDDD | 4530 |
| TR       | A0A0U1WHI4 A0A0U1WHI4_CVHSA | VAVHDFKFRVDGDMVPHISRQLTKYTMADLVYALRHFDEGNCDTLKEILVTYNCCDDD | 4519 |
| TR       | A0A0U1WHG0 A0A0U1WHG0_CVHSA | VAVHDFKFRVDGDMVPHISRQLTKYTMADLVYALRHFDEGNCDTLKEILVTYNCCDDD | 4519 |
| TR       | A0A166ZL34 A0A166ZL34_9NIDO | VAVHDFKFRVDGDMVPHISRQLTKYTMADLVYALRHFDEGNCDTLKEILVTYNCCDDD | 4326 |
| TR       | R9QTB2 R9QTB2_CVHSA         | -----                                                      |      |
| TR       | R9QTH2 R9QTH2_CVHSA         | -----                                                      |      |
| SP       | P0C6U8 R1A_CVHSA            | -----                                                      |      |
| TR       | Q6JH47 Q6JH47_CVHSA         | -----                                                      |      |
| TR       | Q692E5 Q692E5_CVHSA         | -----                                                      |      |
| SP       | P0C6F8 R1A_BCHK3            | -----                                                      |      |
| TR       | A0A0K1Z0N1 A0A0K1Z0N1_CVHSA | -----                                                      |      |
| SP       | P0C6F5 R1A_BC279            | -----                                                      |      |
| SP       | P0C6T7 R1A_BCRP3            | -----                                                      |      |



|          |                             |                                                              |      |
|----------|-----------------------------|--------------------------------------------------------------|------|
| QHN73794 |                             | YFNKKDWYDFVENPDILRVYANLGERVRQALLKTVQFCDAMRNAGIVGVLTLDNQDLNGN | 4607 |
| SP       | P0C6X7 R1AB_CVHSA           | YFNKKDWYDFVENPDILRVYANLGERVRQSLLKTVQFCDAMRDAGIVGVLTLDNQDLNGN | 4584 |
| TR       | Q6UZF5 Q6UZF5_CVHSA         | YFNKKDWYDFVENPDILRVYANLGERVRQSLLKTVQFCDAMRDAGIVGVLTLDNQDLNGN | 4584 |
| TR       | Q6UZF1 Q6UZF1_CVHSA         | YFNKKDWYDFVENPDILRVYANLGERVRQSLLKTVQFCDAMRDAGIVGVLTLDNQDLNGN | 4584 |
| TR       | Q6JH48 Q6JH48_CVHSA         | YFNKKDWYDFVENPDILRVYANLGERVRQSLLKTVQFCDAMRDAGIVGVLTLDNQDLNGN | 4584 |
| TR       | Q692E6 Q692E6_CVHSA         | YFNKKDWYDFVENPDILRVYANLGERVRQSLLKTVQFCDAMRDAGIVGVLTLDNQDLNGN | 4584 |
| TR       | A0A0K1YZY7 A0A0K1YZY7_CVHSA | YFNKKDWYDFVENPDILRVYANLGERVRQALLKTVQFCDAMRDAGIVGVLTLDNQDLNGN | 4584 |
| SP       | P0C6W2 R1AB_BCHK3           | YFNKKDWYDFVENPDVLRVYANLGERVRRALLKTVQFCDAMRDAGIVGVLTLDNQDLNGN | 4578 |
| SP       | P0C6W6 R1AB_BCRP3           | YFNKKDWYDFVENPDILRVYANLGERVRQALLKTVQFCDAMRDAGIVGVLTLDNQDLNGN | 4582 |
| SP       | P0C6V9 R1AB_BC279           | YFNKKDWYDFVENPDILRVYANLGERVRQALLKTVQFCDAMRDAGIVGVLTLDNQDLNGN | 4590 |
| TR       | A0A0U1WHI4 A0A0U1WHI4_CVHSA | YFNKKDWYDFVENPDILRVYANLGERVRQALLKTVQFCDAMRDAGIVGVLTLDNQDLNGN | 4579 |
| TR       | A0A0U1WHG0 A0A0U1WHG0_CVHSA | YFNKKDWYDFVENPDILRVYANLGERVRQALLKTVQFCDAMRDAGIVGVLTLDNQDLNGN | 4579 |
| TR       | A0A166ZL34 A0A166ZL34_9NIDO | YFNKKDWYDFVENPDILRVYANLGERVRQALLKTVQFCDAMRDAGIVGVLTLDNQDLNGN | 4386 |
| TR       | R9QTB2 R9QTB2_CVHSA         | -----                                                        |      |
| TR       | R9QTH2 R9QTH2_CVHSA         | -----                                                        |      |
| SP       | P0C6U8 R1A_CVHSA            | -----                                                        |      |
| TR       | Q6JH47 Q6JH47_CVHSA         | -----                                                        |      |
| TR       | Q692E5 Q692E5_CVHSA         | -----                                                        |      |
| SP       | P0C6F8 R1A_BCHK3            | -----                                                        |      |
| TR       | A0A0K1Z0N1 A0A0K1Z0N1_CVHSA | -----                                                        |      |
| SP       | P0C6F5 R1A_BC279            | -----                                                        |      |
| SP       | P0C6T7 R1A_BCRP3            | -----                                                        |      |

|          |                             |                                                                |      |
|----------|-----------------------------|----------------------------------------------------------------|------|
| QHN73794 |                             | WYDFGDFIQTTTPGSGVPVVDSSYSSLLMPILTLTRALTAESHVDTDLTKPIYIKWDLKDYF | 4667 |
| SP       | P0C6X7 R1AB_CVHSA           | WYDFGDFVQVAPGCGVPVVDSSYSSLLMPILTLTRALAAESHMDADLAKPLIKWDLKDYF   | 4644 |
| TR       | Q6UZF5 Q6UZF5_CVHSA         | WYDFGDFVQVAPGCGVPVVDSSYSSLLMPILTLTRALAAESHMDADLAKPLIKWDLKDYF   | 4644 |
| TR       | Q6UZF1 Q6UZF1_CVHSA         | WYDFGDFVQVAPGCGVPVVDSSYSSLLMPILTLTRALAAESHMDADLAKPLIKWDLKDYF   | 4644 |
| TR       | Q6JH48 Q6JH48_CVHSA         | WYDFGDFVQVAPGCGVPVVDSSYSSLLMPILTLTRALAAESHMDADLAKPLIKWDLKDYF   | 4644 |
| TR       | Q692E6 Q692E6_CVHSA         | WYDFGDFVQVAPGCGVPVVDSSYSSLLMPILTLTRALAAESHMDADLAKPLIKWDLKDYF   | 4644 |
| TR       | A0A0K1YZY7 A0A0K1YZY7_CVHSA | WYDFGDFVQVAPGCGVPVVDSSYSSLLMPILTMTRALAAESHMDADLAKPLIKWDLKDYF   | 4644 |
| SP       | P0C6W2 R1AB_BCHK3           | WYDFGDFVQVAPGCGVPVVDSSYSSLLMPILTLTKALAAESHMDADLAKPLVWDLKDYF    | 4638 |
| SP       | P0C6W6 R1AB_BCRP3           | WYDFGDFVQVAPGCGVPVVDSSYSSLLMPILTLTRALAAESHMDADLAKPLIKWDLKDYF   | 4642 |
| SP       | P0C6V9 R1AB_BC279           | WYDFGDFVQVAPGCGVPVVDSSYSSLLMPILTLTKALAAESHMDADLAKPLIKWDLKDYF   | 4650 |
| TR       | A0A0U1WHI4 A0A0U1WHI4_CVHSA | WYDFGDFVQVAPGCGVPVVDSSYSSLLMPILTLTRALAAESHMDADLTKPLIKWDLKDYF   | 4639 |
| TR       | A0A0U1WHG0 A0A0U1WHG0_CVHSA | WYDFGDFVQVTPGCGVPVVDSSYSSLLMPILTLTRALAAESHMDTDLTKPLIKWDLKDYF   | 4639 |
| TR       | A0A166ZL34 A0A166ZL34_9NIDO | WYDFGDFVQVTPGCGVPVVDSSYSSLLMPILTLTRALAAESHMDTDLTKPLIKWDLKDYF   | 4446 |
| TR       | R9QTB2 R9QTB2_CVHSA         | -----                                                          |      |
| TR       | R9QTH2 R9QTH2_CVHSA         | -----                                                          |      |
| SP       | P0C6U8 R1A_CVHSA            | -----                                                          |      |
| TR       | Q6JH47 Q6JH47_CVHSA         | -----                                                          |      |
| TR       | Q692E5 Q692E5_CVHSA         | -----                                                          |      |
| SP       | P0C6F8 R1A_BCHK3            | -----                                                          |      |
| TR       | A0A0K1Z0N1 A0A0K1Z0N1_CVHSA | -----                                                          |      |
| SP       | P0C6F5 R1A_BC279            | -----                                                          |      |
| SP       | P0C6T7 R1A_BCRP3            | -----                                                          |      |

|          |                             |                                                              |      |
|----------|-----------------------------|--------------------------------------------------------------|------|
| QHN73794 |                             | TEERLCLFDRYFKYWDQTYHPNCVNCILDDRCILHCANFNVLSTVFPPTSFGPLVRKIFV | 4727 |
| SP       | P0C6X7 R1AB_CVHSA           | TEERLCLFDRYFKYWDQTYHPNCINCLDDRCILHCANFNVLSTVFPPTSFGPLVRKIFV  | 4704 |
| TR       | Q6UZF5 Q6UZF5_CVHSA         | TEERLCLFDRYFKYWDQTYHPNCINCLDDRCILHCANFNVLSTVFPPTSFGPLVRKIFV  | 4704 |
| TR       | Q6UZF1 Q6UZF1_CVHSA         | TEERLCLFDRYFKYWDQTYHPNCINCLDDRCILHCANFNVLSTVFPPTSFGPLVRKIFV  | 4704 |
| TR       | Q6JH48 Q6JH48_CVHSA         | TEERLCLFDRYFKYWDQTYHPNCINCLDDRCILHCANFNVLSTVFPPTSFGPLVRKIFV  | 4704 |
| TR       | Q692E6 Q692E6_CVHSA         | TEERLCLFDRYFKYWDQTYHPNCINCLDDRCILHCANFNVLSTVFPPTSFGPLVRKIFV  | 4704 |
| TR       | A0A0K1YZY7 A0A0K1YZY7_CVHSA | TEERLCLFDRYFKYWDQTYHPNCINCLDDRCILHCANFNVLSTVFPPTSFGPLVRKIFV  | 4704 |
| SP       | P0C6W2 R1AB_BCHK3           | TEERLCLFDRYFKYWDQTYHPNCINCLDDRCILHCANFNVLSTVFPPTSFGPLVRKIFV  | 4698 |
| SP       | P0C6W6 R1AB_BCRP3           | TAERLCLFDRYFKYWDQTYHPNCINCLDDRCILHCANFNVLSTVFPPTSFGPLVRKIFV  | 4702 |
| SP       | P0C6V9 R1AB_BC279           | TEERLCLFDRYFKYWDQTYHPNCINCLDDRCILHCANFNVLSTVFPPTSFGPLVRKIFV  | 4710 |
| TR       | A0A0U1WHI4 A0A0U1WHI4_CVHSA | TEERLCLFDRYFKYWDQTYHPNCVNCILDDRCILHCANFNVLSTVFPPTSFGPLVRKIFV | 4699 |
| TR       | A0A0U1WHG0 A0A0U1WHG0_CVHSA | TEERLCLFDRYFKYWDQTYHPNCINCLDDRCILHCANFNVLSTVFPPTSFGPLVRKIFV  | 4699 |
| TR       | A0A166ZL34 A0A166ZL34_9NIDO | TEERLCLFDRYFKYWDQTYHPNCINCLDDRCILHCANFNVLSTVFPPTSFGPLVRKIFV  | 4506 |
| TR       | R9QTB2 R9QTB2_CVHSA         | -----                                                        |      |
| TR       | R9QTH2 R9QTH2_CVHSA         | -----                                                        |      |
| SP       | P0C6U8 R1A_CVHSA            | -----                                                        |      |
| TR       | Q6JH47 Q6JH47_CVHSA         | -----                                                        |      |
| TR       | Q692E5 Q692E5_CVHSA         | -----                                                        |      |
| SP       | P0C6F8 R1A_BCHK3            | -----                                                        |      |
| TR       | A0A0K1Z0N1 A0A0K1Z0N1_CVHSA | -----                                                        |      |
| SP       | P0C6F5 R1A_BC279            | -----                                                        |      |
| SP       | P0C6T7 R1A_BCRP3            | -----                                                        |      |

QHN73794  
SP P0C6X7 | R1AB\_CVHSA  
TR Q6UZF5 | Q6UZF5\_CVHSA  
TR Q6UZF1 | Q6UZF1\_CVHSA  
TR Q6JH48 | Q6JH48\_CVHSA  
TR Q692E6 | Q692E6\_CVHSA  
TR A0A0K1YZY7 | A0A0K1YZY7\_CVHSA  
SP P0C6W2 | R1AB\_BCHK3  
SP P0C6W6 | R1AB\_BCRP3  
SP P0C6V9 | R1AB\_BC279  
TR A0A0U1WHI4 | A0A0U1WHI4\_CVHSA  
TR A0A0U1WHG0 | A0A0U1WHG0\_CVHSA  
TR A0A166ZL34 | A0A166ZL34\_9NIDO  
TR R9QTB2 | R9QTB2\_CVHSA  
TR R9QTH2 | R9QTH2\_CVHSA  
SP P0C6U8 | R1A\_CVHSA  
TR Q6JH47 | Q6JH47\_CVHSA  
TR Q692E5 | Q692E5\_CVHSA  
SP P0C6F8 | R1A\_BCHK3  
TR A0A0K1Z0N1 | A0A0K1Z0N1\_CVHSA  
SP P0C6F5 | R1A\_BC279  
SP P0C6T7 | R1A\_BCRP3

DGVPFVVSTGYHFRELGVVHNQDVNLHSSRSLFKELLVYAADPAMHAASGNLLLDKRTTC 4787  
DGVPFVVSTGYHFRELGVVHNQDVNLHSSRSLFKELLVYAADPAMHAASGNLLLDKRTTC 4764  
DGVPFVVSTGYHFRELGVVHNQDVNLHSSRSLFKELLVYAADPAMHAASGNLLLDKRTTC 4764  
DGVPFVVSTGYHFRELGVVHNQDVNLHSSRSLFKELLVYAADPAMHAASGNLLLDKRTTC 4764  
DGVPFVVSTGYHFRELGVVHNQDVNLHSSRSLFKELLVYAADPAMHAASGNLLLDKRTTC 4764  
DGVPFVVSTGYHFRELGVVHNQDVNLHSSRSLFKELLVYAADPAMHAASGNLLLDKRTTC 4764  
DGVPFVVSTGYHFRELGVVHNQDVNLHSSRSLFKELLVYAADPAMHAASGNLLLDKRTTC 4758  
DGVPFVVSTGYHFRELGVVHNQDVNLHSSRSLFKELLVYAADPAMHAASGNLLLDKRTTC 4762  
DGVPFVVSTGYHFRELGVVHNQDVNLHSSRSLFKELLVYAADPAMHAASGNLLLDKRTTC 4770  
DGVPFVVSTGYHFRELGVVHNQDVNLHSSRSLFKELLVYAADPAMHAASGNLLLDKRTTC 4759  
DGVPFVVSTGYHFRELGVVHNQDVNLHSSRSLFKELLVYAADPAMHAASGNLLLDKRTTC 4759  
DGVPFVVSTGYHFRELGVVHNQDVNLHSSRSLFKELLVYAADPAMHAASGNLLLDKRTTC 4566

QHN73794  
SP P0C6X7 | R1AB\_CVHSA  
TR Q6UZF5 | Q6UZF5\_CVHSA  
TR Q6UZF1 | Q6UZF1\_CVHSA  
TR Q6JH48 | Q6JH48\_CVHSA  
TR Q692E6 | Q692E6\_CVHSA  
TR A0A0K1YZY7 | A0A0K1YZY7\_CVHSA  
SP P0C6W2 | R1AB\_BCHK3  
SP P0C6W6 | R1AB\_BCRP3  
SP P0C6V9 | R1AB\_BC279  
TR A0A0U1WHI4 | A0A0U1WHI4\_CVHSA  
TR A0A0U1WHG0 | A0A0U1WHG0\_CVHSA  
TR A0A166ZL34 | A0A166ZL34\_9NIDO  
TR R9QTB2 | R9QTB2\_CVHSA  
TR R9QTH2 | R9QTH2\_CVHSA  
SP P0C6U8 | R1A\_CVHSA  
TR Q6JH47 | Q6JH47\_CVHSA  
TR Q692E5 | Q692E5\_CVHSA  
SP P0C6F8 | R1A\_BCHK3  
TR A0A0K1Z0N1 | A0A0K1Z0N1\_CVHSA  
SP P0C6F5 | R1A\_BC279  
SP P0C6T7 | R1A\_BCRP3

FSVAALTNNVAFQTVKPGNFNKFDFYDFAVSKGFFKEGSSVELKHFFFAQDGNAAISDYDY 4847  
FSVAALTNNVAFQTVKPGNFNKFDFYDFAVSKGFFKEGSSVELKHFFFAQDGNAAISDYDY 4824  
FSVAALTNNVAFQTVKPGNFNKFDFYDFAVSKGFFKEGSSVELKHFFFAQDGNAAISDYDY 4824  
FSVAALTNNVAFQTVKPGNFNKFDFYDFAVSKGFFKEGSSVELKHFFFAQDGNAAISDYDY 4824  
FSVAALTNNVAFQTVKPGNFNKFDFYDFAVSKGFFKEGSSVELKHFFFAQDGNAAISDYDY 4824  
FSVAALTNNVAFQTVKPGNFNKFDFYDFAVSKGFFKEGSSVELKHFFFAQDGNAAISDYDY 4824  
FSVAALTNNVAFQTVKPGNFNKFDFYDFAVSKGFFKEGSSVELKHFFFAQDGNAAISDYDY 4818  
FSVAALTNNVAFQTVKPGNFNKFDFYDFAVSKGFFKEGSSVELKHFFFAQDGNAAISDYDY 4822  
FSVAALTNNVAFQTVKPGNFNKFDFYDFAVSKGFFKEGSSVELKHFFFAQDGNAAISDYDY 4830  
FSVAALTNVFSQTVKPGNFNKFDFYDFAVSKGFFKEGSSVELKHFFFAQDGNAAISDYDY 4819  
FSVAALTNVFSQTVKPGNFNKFDFYDFAVSKGFFKEGSSVELKHFFFAQDGNAAISDYDY 4819  
FSVAALTNVFSQTVKPGNFNKFDFYDFAVSKGFFKEGSSVELKHFFFAQDGNAAISDYDY 4626

QHN73794  
SP P0C6X7 | R1AB\_CVHSA  
TR Q6UZF5 | Q6UZF5\_CVHSA  
TR Q6UZF1 | Q6UZF1\_CVHSA  
TR Q6JH48 | Q6JH48\_CVHSA  
TR Q692E6 | Q692E6\_CVHSA  
TR A0A0K1YZY7 | A0A0K1YZY7\_CVHSA  
SP P0C6W2 | R1AB\_BCHK3  
SP P0C6W6 | R1AB\_BCRP3  
SP P0C6V9 | R1AB\_BC279  
TR A0A0U1WHI4 | A0A0U1WHI4\_CVHSA  
TR A0A0U1WHG0 | A0A0U1WHG0\_CVHSA  
TR A0A166ZL34 | A0A166ZL34\_9NIDO  
TR R9QTB2 | R9QTB2\_CVHSA  
TR R9QTH2 | R9QTH2\_CVHSA  
SP P0C6U8 | R1A\_CVHSA  
TR Q6JH47 | Q6JH47\_CVHSA  
TR Q692E5 | Q692E5\_CVHSA  
SP P0C6F8 | R1A\_BCHK3  
TR A0A0K1Z0N1 | A0A0K1Z0N1\_CVHSA  
SP P0C6F5 | R1A\_BC279  
SP P0C6T7 | R1A\_BCRP3

YRYNLPTMCDIRQLLFVVEVDKYFDCYDGGCINANQVIVNNLDKSAGFPFNKWKARLY 4907  
YRYNLPTMCDIRQLLFVVEVDKYFDCYDGGCINANQVIVNNLDKSAGFPFNKWKARLY 4884  
YRYNLPTMCDIRQLLFVVEVDKYFDCYDGGCINANQVIVNNLDKSAGFPFNKWKARLY 4884  
YRYNLPTMCDIRQLLFVVEVDKYFDCYDGGCINANQVIVNNLDKSAGFPFNKWKARLY 4884  
YRYNLPTMCDIRQLLFVVEVDKYFDCYDGGCINANQVIVNNLDKSAGFPFNKWKARLY 4884  
YRYNLPTMCDIRQLLFVVEVDKYFDCYDGGCINANQVIVNNLDKSAGFPFNKWKARLY 4884  
YRYNLPTMCDIRQLLFVVEVDKYFDCYDGGCINANQVIVNNLDKSAGFPFNKWKARLY 4878  
YRYNLPTMCDIRQLLFVVEVDKYFDCYDGGCINANQVIVNNLDKSAGFPFNKWKARLY 4882  
YRYNLPTMCDIRQLLFVVEVDKYFDCYDGGCINANQVIVNNLDKSAGFPFNKWKARLY 4890  
YRYNLPTMCDIRQLLFVVEVDKYFDCYDGGCINANQVIVNNLDKSAGFPFNKWKARLY 4879  
YRYNLPTMCDIRQLLFVVEVDKYFDCYDGGCINANQVIVNNLDKSAGFPFNKWKARLY 4879  
YRYNLPTMCDIRQLLFVVEVDKYFDCYDGGCINANQVIVNNLDKSAGFPFNKWKARLY 4686

|          |                             |                                                 |      |
|----------|-----------------------------|-------------------------------------------------|------|
| QHN73794 |                             | YDSMSYEDQDALFAYTKRNVIPITITQMNLYAISAKNRARTVAGVSI | 4967 |
| SP       | P0C6X7 R1AB_CVHSA           | YDSMSYEDQDALFAYTKRNVIPITITQMNLYAISAKNRARTVAGVSI | 4944 |
| TR       | Q6UZF5 Q6UZF5_CVHSA         | YDSMSYEDQDALFAYTKRNVIPITITQMNLYAISAKNRARTVAGVSI | 4944 |
| TR       | Q6UZF1 Q6UZF1_CVHSA         | YDSMSYEDQDALFAYTKRNVIPITITQMNLYAISAKNRARTVAGVSI | 4944 |
| TR       | Q6JH48 Q6JH48_CVHSA         | YDSMSYEDQDALFAYTKRNVIPITITQMNLYAISAKNRARTVAGVSI | 4944 |
| TR       | Q692E6 Q692E6_CVHSA         | YDSMSYEDQDALFAYTKRNVIPITITQMNLYAISAKNRARTVAGVSI | 4944 |
| TR       | A0A0K1YZY7 A0A0K1YZY7_CVHSA | YDSMSYEDQDALFAYTKRNVIPITITQMNLYAISAKNRARTVAGVSI | 4944 |
| SP       | P0C6W2 R1AB_BCHK3           | YDSMSYEDQDALFAYTKRNVIPITITQMNLYAISAKNRARTVAGVSI | 4938 |
| SP       | P0C6W6 R1AB_BCRP3           | YDSMSYEDQDALFAYTKRNVIPITITQMNLYAISAKNRARTVAGVSI | 4942 |
| SP       | P0C6V9 R1AB_BC279           | YDSMSYEDQDALFAYTKRNVIPITITQMNLYAISAKNRARTVAGVSI | 4950 |
| TR       | A0A0U1WHI4 A0A0U1WHI4_CVHSA | YDSMSYEDQDALFAYTKRNVLPITITQMNLYAISAKNRARTVAGVSI | 4939 |
| TR       | A0A0U1WHG0 A0A0U1WHG0_CVHSA | YDSMSYEDQDALFAYTKRNVLPITITQMNLYAISAKNRARTVAGVSI | 4939 |
| TR       | A0A166ZL34 A0A166ZL34_9NIDO | YDSMSYEDQDALFAYTKRNVLPITITQMNLYAISAKNRARTVAGVSI | 4746 |
| TR       | R9QTB2 R9QTB2_CVHSA         | -----                                           |      |
| TR       | R9QTH2 R9QTH2_CVHSA         | -----                                           |      |
| SP       | P0C6U8 R1A_CVHSA            | -----                                           |      |
| TR       | Q6JH47 Q6JH47_CVHSA         | -----                                           |      |
| TR       | Q692E5 Q692E5_CVHSA         | -----                                           |      |
| SP       | P0C6F8 R1A_BCHK3            | -----                                           |      |
| TR       | A0A0K1Z0N1 A0A0K1Z0N1_CVHSA | -----                                           |      |
| SP       | P0C6F5 R1A_BC279            | -----                                           |      |
| SP       | P0C6T7 R1A_BCRP3            | -----                                           |      |

|          |                             |                                                              |      |
|----------|-----------------------------|--------------------------------------------------------------|------|
| QHN73794 |                             | LKSIAATRGATVVIGTSKFYGGWHNMLKTVYSDVENPHLMGWDYPKCDRAMPNMLRIMAS | 5027 |
| SP       | P0C6X7 R1AB_CVHSA           | LKSIAATRGATVVIGTSKFYGGWHNMLKTVYSDVETPHLMGWDYPKCDRAMPNMLRIMAS | 5004 |
| TR       | Q6UZF5 Q6UZF5_CVHSA         | LKSIAATRGATVVIGTSKFYGGWHNMLKTVYSDVETPHLMGWDYPKCDRAMPNMLRIMAS | 5004 |
| TR       | Q6UZF1 Q6UZF1_CVHSA         | LKSIAATRGATVVIGTSKFYGGWHNMLKTVYSDVETPHLMGWDYPKCDRAMPNMLRIMAS | 5004 |
| TR       | Q6JH48 Q6JH48_CVHSA         | LKSIAATRGATVVIGTSKFYGGWHNMLKTVYSDVETPHLMGWDYPKCDRAMPNMLRIMAS | 5004 |
| TR       | Q692E6 Q692E6_CVHSA         | LKSIAATRGATVVIGTSKFYGGWHNMLKTVYSDVETPHLMGWDYPKCDRAMPNMLRIMAS | 5004 |
| TR       | A0A0K1YZY7 A0A0K1YZY7_CVHSA | LKSIAATRGATVVIGTSKFYGGWHNMLKTVYSDVETPHLMGWDYPKCDRAMPNMLRIMAS | 5004 |
| SP       | P0C6W2 R1AB_BCHK3           | LKSIAATRGATVVIGTSKFYGGWHNMLKTVYSDVESPHLMGWDYPKCDRAMPNMLRIMAS | 4998 |
| SP       | P0C6W6 R1AB_BCRP3           | LKSIAATRGATVVIGTSKFYGGWHNMLKTVYSDVETPHLMGWDYPKCDRAMPNMLRIMAS | 5002 |
| SP       | P0C6V9 R1AB_BC279           | LKSIAATRGATVVIGTSKFYGGWHNMLKTVYSDVETPHLMGWDYPKCDRAMPNMLRIMAS | 5010 |
| TR       | A0A0U1WHI4 A0A0U1WHI4_CVHSA | LKSIAATRGATVVIGTSKFYGGWHNMLKTVYSDVETPYLMGWDYPKCDRAMPNMLRIMAF | 4999 |
| TR       | A0A0U1WHG0 A0A0U1WHG0_CVHSA | LKSIAATRGATVVIGTSKFYGGWHNMLKTVYSDVETPHLMGWDYPKCDRAMPNMLRIMAS | 4999 |
| TR       | A0A166ZL34 A0A166ZL34_9NIDO | LKSIAATRGATVVIGTSKFYGGWHNMLKTVYSDVETPHLMGWDYPKCDRAMPNMLRIMAS | 4806 |
| TR       | R9QTB2 R9QTB2_CVHSA         | -----                                                        |      |
| TR       | R9QTH2 R9QTH2_CVHSA         | -----                                                        |      |
| SP       | P0C6U8 R1A_CVHSA            | -----                                                        |      |
| TR       | Q6JH47 Q6JH47_CVHSA         | -----                                                        |      |
| TR       | Q692E5 Q692E5_CVHSA         | -----                                                        |      |
| SP       | P0C6F8 R1A_BCHK3            | -----                                                        |      |
| TR       | A0A0K1Z0N1 A0A0K1Z0N1_CVHSA | -----                                                        |      |
| SP       | P0C6F5 R1A_BC279            | -----                                                        |      |
| SP       | P0C6T7 R1A_BCRP3            | -----                                                        |      |

|          |                             |                                                              |      |
|----------|-----------------------------|--------------------------------------------------------------|------|
| QHN73794 |                             | LVLARKHTTCCSLSHRFYRLANEAQVLSSEMVMCGGSLYVKPGGTSSGDATTAYANSVFN | 5087 |
| SP       | P0C6X7 R1AB_CVHSA           | LVLARKHNTCCNLSHRFYRLANEAQVLSSEMVMCGGSLYVKPGGTSSGDATTAYANSVFN | 5064 |
| TR       | Q6UZF5 Q6UZF5_CVHSA         | LVLARKHNTCCNLSHRFYRLANEAQVLSSEMVMCGGSLYVKPGGTSSGDATTAYANSVFN | 5064 |
| TR       | Q6UZF1 Q6UZF1_CVHSA         | LVLARKHNTCCNLSHRFYRLANEAQVLSSEMVMCGGSLYVKPGGTSSGDATTAYANSVFN | 5064 |
| TR       | Q6JH48 Q6JH48_CVHSA         | LVLARKHNTCCNLSHRFYRLANEAQVLSSEMVMCGGSLYVKPGGTSSGDATTAYANSVFN | 5064 |
| TR       | Q692E6 Q692E6_CVHSA         | LVLARKHNTCCNLSHRFYRLANEAQVLSSEMVMCGGSLYVKPGGTSSGDATTAYANSVFN | 5064 |
| TR       | A0A0K1YZY7 A0A0K1YZY7_CVHSA | LVLARKHSTCCNLSHRFYRLANEAQVLSSEMVMCGGSLYVKPGGTSSGDATTAYANSVFN | 5064 |
| SP       | P0C6W2 R1AB_BCHK3           | LILARKHSTCCNLSHRFYRLANEAQVLSSEMVMCGGSLYVKPGGTSSGDATTAYANSVFN | 5058 |
| SP       | P0C6W6 R1AB_BCRP3           | LVLARKHSTCCNLSHRFYRLANEAQVLSSEMVMCGGSLYVKPGGTSSGDATTAYANSVFN | 5062 |
| SP       | P0C6V9 R1AB_BC279           | LVLARKHSTCCNLSHRFYRLANEAQVLSSEMVMCGGSLYVKPGGTSSGDATTAYANSVFN | 5070 |
| TR       | A0A0U1WHI4 A0A0U1WHI4_CVHSA | LVFSRKHSTCCNLSHRFYRLANEAQVLSSEMVMCGGSLYVKPGGTSSGDATTAYANSVFN | 5059 |
| TR       | A0A0U1WHG0 A0A0U1WHG0_CVHSA | LVLARKHSTCCNLSHRFYRLANEAQVLSSEMVMCGGSLYVKPGGTSSGDATTAYANSVFN | 5059 |
| TR       | A0A166ZL34 A0A166ZL34_9NIDO | LVLARKHSTCCNLSHRFYRLANEAQVLSSEMVMCGGSLYVKPGGTSSGDATTAYANSVFN | 4866 |
| TR       | R9QTB2 R9QTB2_CVHSA         | -----                                                        |      |
| TR       | R9QTH2 R9QTH2_CVHSA         | -----                                                        |      |
| SP       | P0C6U8 R1A_CVHSA            | -----                                                        |      |
| TR       | Q6JH47 Q6JH47_CVHSA         | -----                                                        |      |
| TR       | Q692E5 Q692E5_CVHSA         | -----                                                        |      |
| SP       | P0C6F8 R1A_BCHK3            | -----                                                        |      |
| TR       | A0A0K1Z0N1 A0A0K1Z0N1_CVHSA | -----                                                        |      |
| SP       | P0C6F5 R1A_BC279            | -----                                                        |      |
| SP       | P0C6T7 R1A_BCRP3            | -----                                                        |      |

|          |                             |                                                             |      |
|----------|-----------------------------|-------------------------------------------------------------|------|
| QHN73794 |                             | ICQAVTANVNALLSTDGNKIADKYVRNLQHRLYECLYRNRDVTDFVNEFYAYLRKHFSM | 5147 |
| SP       | P0C6X7 R1AB_CVHSA           | ICQAVTANVNALLSTDGNKIADKYVRNLQHRLYECLYRNRDVEHFVDEFYAYLRKHFSM | 5124 |
| TR       | Q6UZF5 Q6UZF5_CVHSA         | ICQAVTANVNALLSTDGNKIADKYVRNLQHRLYECLYRNRDVEHFVDEFYAYLRKHFSM | 5124 |
| TR       | Q6UZF1 Q6UZF1_CVHSA         | ICQAVTANVNALLSTDGNKIADKYVRNLQHRLYECLYRNRDVEHFVDEFYAYLRKHFSM | 5124 |
| TR       | Q6JH48 Q6JH48_CVHSA         | ICQAVTANVNALLSTDGNKIADKYVRNLQHRLYECLYRNRDVEHFVDEFYAYLRKHFSM | 5124 |
| TR       | Q692E6 Q692E6_CVHSA         | ICQAVTANVNALLSTDGNKIADKYVRNLQHRLYECLYRNRDVEHFVDEFYAYLRKHFSM | 5124 |
| TR       | A0A0K1YZY7 A0A0K1YZY7_CVHSA | ICQAVTANVNALLSTDGNKIADKYVRNLQHRLYECLYRNRDVEHFVDEFYAYLRKHFSM | 5124 |
| SP       | P0C6W2 R1AB_BCHK3           | ICQAVTANVNALLSTDGNKIADKYVRNLQHRLYECLYRNRDVEHFVDEFYAYLRKHFSM | 5118 |
| SP       | P0C6W6 R1AB_BCRP3           | ICQAVTANVNALLSTDGNKIADKYVRNLQHRLYECLYRNRDVEHFVDEFYAYLRKHFSM | 5122 |
| SP       | P0C6V9 R1AB_BC279           | ICQAVTANVNALLSTDGNKIADKYVRNLQHRLYECLYRNRDVEHFVDEFYAYLRKHFSM | 5130 |
| TR       | A0A0U1WHI4 A0A0U1WHI4_CVHSA | ICQAVTANVNALLSTDGNKIADKYVRNLQHRLYECLYRNRDVEHFVDEFYAYLRKHFSM | 5119 |
| TR       | A0A0U1WHG0 A0A0U1WHG0_CVHSA | ICQAVTANVNALLSTDGNKIADKYVRNLQHRLYECLYRNRDVEHFVDEFYAYLRKHFSM | 5119 |
| TR       | A0A166ZL34 A0A166ZL34_9NIDO | ICQAVTANVNALLSTDGNKIADKYVRNLQHRLYECLYRNRDVEHFVDEFYAYLRKHFSM | 4926 |
| TR       | R9QTB2 R9QTB2_CVHSA         | -----                                                       |      |
| TR       | R9QTH2 R9QTH2_CVHSA         | -----                                                       |      |
| SP       | P0C6U8 R1A_CVHSA            | -----                                                       |      |
| TR       | Q6JH47 Q6JH47_CVHSA         | -----                                                       |      |
| TR       | Q692E5 Q692E5_CVHSA         | -----                                                       |      |
| SP       | P0C6F8 R1A_BCHK3            | -----                                                       |      |
| TR       | A0A0K1Z0N1 A0A0K1Z0N1_CVHSA | -----                                                       |      |
| SP       | P0C6F5 R1A_BC279            | -----                                                       |      |
| SP       | P0C6T7 R1A_BCRP3            | -----                                                       |      |

|          |                             |                                                              |      |
|----------|-----------------------------|--------------------------------------------------------------|------|
| QHN73794 |                             | MILSDDAVVCFNSTYASQGLVASIKNFKSVLYYQNNVFMSEAKCWTETDLTKGPHEFCSQ | 5207 |
| SP       | P0C6X7 R1AB_CVHSA           | MILSDDAVVCYNSNYAAQGLVASIKNFKAVLYYQNNVFMSEAKCWTETDLTKGPHEFCSQ | 5184 |
| TR       | Q6UZF5 Q6UZF5_CVHSA         | MILSDDAVVCYNSNYAAQGLVASIKNFKAVLYYQNNVFMSEAKCWTETDLTKGPHEFCSQ | 5184 |
| TR       | Q6UZF1 Q6UZF1_CVHSA         | MILSDDAVVCYNSNYAAQGLVASIKNFKAVLYYQNNVFMSEAKCWTETDLTKGPHEFCSQ | 5184 |
| TR       | Q6JH48 Q6JH48_CVHSA         | MILSDDAVVCYNSNYAAQGLVASIKNFKAVLYYQNNVFMSEAKCWTETDLTKGPHEFCSQ | 5184 |
| TR       | Q692E6 Q692E6_CVHSA         | MILSDDAVVCYNSNYAAQGLVASIKNFKAVLYYQNNVFMSEAKCWTETDLTKGPHEFCSQ | 5184 |
| TR       | A0A0K1YZY7 A0A0K1YZY7_CVHSA | MILSDDAVVCYNSNYAAQGLVASIKNFKAVLYYQNNVFMSEAKCWTETDLTKGPHEFCSQ | 5184 |
| SP       | P0C6W2 R1AB_BCHK3           | MILSDDAVVCYNSNYAAQGLVASIKNFKAVLYYQNNVFMSEAKCWTETDLTKGPHEFCSQ | 5178 |
| SP       | P0C6W6 R1AB_BCRP3           | MILSDDAVVCYNSNYAAQGLVASIKNFKAVLYYQNNVFMSEAKCWTETDLTKGPHEFCSQ | 5182 |
| SP       | P0C6V9 R1AB_BC279           | MILSDDAVVCYNSNYAAQGLVASIKNFKAVHYQNNVFMSEAKCWTETDLTKGPHEFCSQ  | 5190 |
| TR       | A0A0U1WHI4 A0A0U1WHI4_CVHSA | MILSDDAVVCYNSNYAAQGLVASIKNFKAVLYYQNNVFMSEAKCWTETDLTKGPHEFCSQ | 5179 |
| TR       | A0A0U1WHG0 A0A0U1WHG0_CVHSA | MILSDDAVVCYNSNYAAQGLVASIKNFKAVLYYQNNVFMSEAKCWTETDLTKGPHEFCSQ | 5179 |
| TR       | A0A166ZL34 A0A166ZL34_9NIDO | MILSDDAVVCYNSNYAAQGLVASIKNFKAVLYYQNNVFMSEAKCWTETDLTKGPHEFCSQ | 4986 |
| TR       | R9QTB2 R9QTB2_CVHSA         | -----                                                        |      |
| TR       | R9QTH2 R9QTH2_CVHSA         | -----                                                        |      |
| SP       | P0C6U8 R1A_CVHSA            | -----                                                        |      |
| TR       | Q6JH47 Q6JH47_CVHSA         | -----                                                        |      |
| TR       | Q692E5 Q692E5_CVHSA         | -----                                                        |      |
| SP       | P0C6F8 R1A_BCHK3            | -----                                                        |      |
| TR       | A0A0K1Z0N1 A0A0K1Z0N1_CVHSA | -----                                                        |      |
| SP       | P0C6F5 R1A_BC279            | -----                                                        |      |
| SP       | P0C6T7 R1A_BCRP3            | -----                                                        |      |

|          |                             |                                                              |      |
|----------|-----------------------------|--------------------------------------------------------------|------|
| QHN73794 |                             | HTMLVKQGDDYVYLPYPDPSRILGAGCFVDDIVKTDGTLMIERFVSLAIDAYPLTKHPNQ | 5267 |
| SP       | P0C6X7 R1AB_CVHSA           | HTMLVKQGDDYVYLPYPDPSRILGAGCFVDDIVKTDGTLMIERFVSLAIDAYPLTKHPNQ | 5244 |
| TR       | Q6UZF5 Q6UZF5_CVHSA         | HTMLVKQGDDYVYLPYPDPSRILGAGCFVDDIVKTDGTLMIERFVSLAIDAYPLTKHPNQ | 5244 |
| TR       | Q6UZF1 Q6UZF1_CVHSA         | HTMLVKQGDDYVYLPYPDPSRILGAGCFVDDIVKTDGTLMIERFVSLAIDAYPLTKHPNQ | 5244 |
| TR       | Q6JH48 Q6JH48_CVHSA         | HTMLVKQGDDYVYLPYPDPSRILGAGCFVDDIVKTDGTLMIERFVSLAIDAYPLTKHPNQ | 5244 |
| TR       | Q692E6 Q692E6_CVHSA         | HTMLVKQGDDYVYLPYPDPSRILGAGCFVDDIVKTDGTLMIERFVSLAIDAYPLTKHPNQ | 5244 |
| TR       | A0A0K1YZY7 A0A0K1YZY7_CVHSA | HTMLVKQGDDYVYLPYPDPSRILGAGCFVDDIVKTDGTLMIERFVSLAIDAYPLTKHPNQ | 5244 |
| SP       | P0C6W2 R1AB_BCHK3           | HTMLVKQGDDYVYLPYPDPSRILGAGCFVDDIVKTDGTLMIERFVSLAIDAYPLTKHPNQ | 5238 |
| SP       | P0C6W6 R1AB_BCRP3           | HTMLVKQGDDYVYLPYPDPSRILGAGCFVDDIVKTDGTLMIERFVSLAIDAYPLTKHPNQ | 5242 |
| SP       | P0C6V9 R1AB_BC279           | HTMLVKQGDDYVYLPYPDPSRILGAGCFVDDIVKTDGTLMIERFVSLAIDAYPLTKHPNQ | 5250 |
| TR       | A0A0U1WHI4 A0A0U1WHI4_CVHSA | HTMLVKQGDDYVYLPYPDPSRILGAGCFVDDIVKTDGTLMIERFVSLAIDAYPLTKHPNQ | 5239 |
| TR       | A0A0U1WHG0 A0A0U1WHG0_CVHSA | HTMLVKQGDDYVYLPYPDPSRILGAGCFVDDIVKTDGTLMIERFVSLAIDAYPLTKHPNQ | 5239 |
| TR       | A0A166ZL34 A0A166ZL34_9NIDO | HTMLVKQGDDYVYLPYPDPSRILGAGCFVDDIVKTDGTLMIERFVSLAIDAYPLTKHPNQ | 5046 |
| TR       | R9QTB2 R9QTB2_CVHSA         | -----                                                        |      |
| TR       | R9QTH2 R9QTH2_CVHSA         | -----                                                        |      |
| SP       | P0C6U8 R1A_CVHSA            | -----                                                        |      |
| TR       | Q6JH47 Q6JH47_CVHSA         | -----                                                        |      |
| TR       | Q692E5 Q692E5_CVHSA         | -----                                                        |      |
| SP       | P0C6F8 R1A_BCHK3            | -----                                                        |      |
| TR       | A0A0K1Z0N1 A0A0K1Z0N1_CVHSA | -----                                                        |      |
| SP       | P0C6F5 R1A_BC279            | -----                                                        |      |
| SP       | P0C6T7 R1A_BCRP3            | -----                                                        |      |



|          |                             |                                                             |      |
|----------|-----------------------------|-------------------------------------------------------------|------|
| QHN73794 |                             | EYADVFLHYLQYIRKLHDELTHGMLDMYSVMLTNDNTSRYWEPEFYEAMYPHTVLQAVG | 5327 |
| SP       | P0C6X7 R1AB_CVHSA           | EYADVFLHYLQYIRKLHDELTHGMLDMYSVMLTNDNTSRYWEPEFYEAMYPHTVLQAVG | 5304 |
| TR       | Q6UZF5 Q6UZF5_CVHSA         | EYADVFLHYLQYIRKLHDELTHGMLDMYSVMLTNDNTSRYWEPEFYEAMYPHTVLQAVG | 5304 |
| TR       | Q6UZF1 Q6UZF1_CVHSA         | EYADVFLHYLQYIRKLHDELTHGMLDMYSVMLTNDNTSRYWEPEFYEAMYPHTVLQAVG | 5304 |
| TR       | Q6JH48 Q6JH48_CVHSA         | EYAAVFHLYLQYIRKLHDELTHGMLDMYSVMLTNDNTSRYWEPEFYEAMYPHTVLQAVG | 5304 |
| TR       | Q692E6 Q692E6_CVHSA         | EYADVFLHYLQYIRKLHDELTHGMLDMYSVMLTNDNTSRYWEPEFYEAMYPHTVLQAVG | 5304 |
| TR       | A0A0K1YZY7 A0A0K1YZY7_CVHSA | EYADVFLHYLQYIRKLHDELTHGMLDMYSVMLTNDNTSRYWEPEFYEAMYPHTVLQAVG | 5304 |
| SP       | P0C6W2 R1AB_BCHK3           | EYADVFLHYLQYIRKLHDELTHGMLDMYSVMLTNDNTSRYWEPEFYEAMYPHTVLQAVG | 5298 |
| SP       | P0C6W6 R1AB_BCRP3           | EYADVFLHYLQYIRKLHDELTHGMLDMYSVMLTNDNTSRYWEPEFYEAMYPHTVLQAVG | 5302 |
| SP       | P0C6V9 R1AB_BC279           | EYADVFLHYLQYIRKLHDELTHGMLDMYSVMLTNDNTSRYWEPEFYEAMYPHTVLQAVG | 5310 |
| TR       | A0A0U1WHI4 A0A0U1WHI4_CVHSA | EYADVFLHYLQYIRKLHDELTHGMLDMYSVMLTNDNTSRYWEPEFYEAMYPHTILQAVG | 5299 |
| TR       | A0A0U1WHG0 A0A0U1WHG0_CVHSA | EYADVFLHYLQYIRKLHDELTHGMLDMYSVMLTNDNTSRYWEPEFYEAMYPHTILQAVG | 5299 |
| TR       | A0A166ZL34 A0A166ZL34_9NIDO | EYADVFLHYLQYIRKLHDELTHGMLDMYSVMLTNDNTSRYWEPEFYEAMYPHTILQAVG | 5106 |
| TR       | R9QTB2 R9QTB2_CVHSA         | -----                                                       |      |
| TR       | R9QTH2 R9QTH2_CVHSA         | -----                                                       |      |
| SP       | P0C6U8 R1A_CVHSA            | -----                                                       |      |
| TR       | Q6JH47 Q6JH47_CVHSA         | -----                                                       |      |
| TR       | Q692E5 Q692E5_CVHSA         | -----                                                       |      |
| SP       | P0C6F8 R1A_BCHK3            | -----                                                       |      |
| TR       | A0A0K1Z0N1 A0A0K1Z0N1_CVHSA | -----                                                       |      |
| SP       | P0C6F5 R1A_BC279            | -----                                                       |      |
| SP       | P0C6T7 R1A_BCRP3            | -----                                                       |      |

|          |                             |                                                              |      |
|----------|-----------------------------|--------------------------------------------------------------|------|
| QHN73794 |                             | ACVLCNSQTSRLCGACIRRPFLCCKCCYDHVISTSHKLVLVSVPYVCNAPGCDVTDVTQL | 5387 |
| SP       | P0C6X7 R1AB_CVHSA           | ACVLCNSQTSRLCGACIRRPFLCCKCCYDHVISTSHKLVLVSVPYVCNAPGCDVTDVTQL | 5364 |
| TR       | Q6UZF5 Q6UZF5_CVHSA         | ACVLCNSQTSRLCGACIRRPFLCCKCCYDHVISTSHKLVLVSVPYVCNAPGCDVTDVTQL | 5364 |
| TR       | Q6UZF1 Q6UZF1_CVHSA         | ACVLCNSQTSRLCGACIRRPFLCCKCCYDHVISTSHKLVLVSVPYVCNAPGCDVTDVTQL | 5364 |
| TR       | Q6JH48 Q6JH48_CVHSA         | ACVLCNSQTSRLCGACIRRPFLCCKCCYDHVISTSHKLVLVSVPYVCNAPGCDVTDVTQL | 5364 |
| TR       | Q692E6 Q692E6_CVHSA         | ACVLCNSQTSRLCGACIRRPFLCCKCCYDHVISTSHKLVLVSVPYVCNAPGCDVTDVTQL | 5364 |
| TR       | A0A0K1YZY7 A0A0K1YZY7_CVHSA | ACVLCNSQTSRLCGACIRRPFLCCKCCYDHVISTSHKLVLVSVPYVCNAPGCDVTDVTQL | 5364 |
| SP       | P0C6W2 R1AB_BCHK3           | ACVLCNSQTSRLCGACIRRPFLCCKCCYDHVISTSHKLVLVSVPYVCNAPGCDVTDVTQL | 5358 |
| SP       | P0C6W6 R1AB_BCRP3           | ACVLCNSQTSRLCGACIRRPFLCCKCCYDHVISTSHKLVLVSVPYVCNAPGCDVTDVTQL | 5362 |
| SP       | P0C6V9 R1AB_BC279           | ACVLCNSQTSRLCGACIRRPFLCCKCCYDHVISTSHKLVLVSVPYVCNAPGCDVTDVTQL | 5370 |
| TR       | A0A0U1WHI4 A0A0U1WHI4_CVHSA | ACVLCNSQTSRLCGACIRRPFLCCKCCYDHVISTSHKLVLVSVPYVCNAPGCDVTDVTQL | 5359 |
| TR       | A0A0U1WHG0 A0A0U1WHG0_CVHSA | ACVLCNSQTSRLCGACIRRPFLCCKCCYDHVISTSHKLVLVSVPYVCNAPGCDVTDVTQL | 5359 |
| TR       | A0A166ZL34 A0A166ZL34_9NIDO | ACVLCNSQTSRLCGACIRRPFLCCKCCYDHVISTSHKLVLVSVPYVCNAPGCDVTDVTQL | 5166 |
| TR       | R9QTB2 R9QTB2_CVHSA         | -----                                                        |      |
| TR       | R9QTH2 R9QTH2_CVHSA         | -----                                                        |      |
| SP       | P0C6U8 R1A_CVHSA            | -----                                                        |      |
| TR       | Q6JH47 Q6JH47_CVHSA         | -----                                                        |      |
| TR       | Q692E5 Q692E5_CVHSA         | -----                                                        |      |
| SP       | P0C6F8 R1A_BCHK3            | -----                                                        |      |
| TR       | A0A0K1Z0N1 A0A0K1Z0N1_CVHSA | -----                                                        |      |
| SP       | P0C6F5 R1A_BC279            | -----                                                        |      |
| SP       | P0C6T7 R1A_BCRP3            | -----                                                        |      |

|          |                             |                                                                |      |
|----------|-----------------------------|----------------------------------------------------------------|------|
| QHN73794 |                             | YLGGMSSYYCKSHKPPISFPLCANGQVFGLYKNTCVGSDNVDTDFNAIATCDWTNAGDYILA | 5447 |
| SP       | P0C6X7 R1AB_CVHSA           | YLGGMSSYYCKSHKPPISFPLCANGQVFGLYKNTCVGSDNVDTDFNAIATCDWTNAGDYILA | 5424 |
| TR       | Q6UZF5 Q6UZF5_CVHSA         | YLGGMSSYYCKSHKPPISFPLCANGQVFGLYKNTCVGSDNVDTDFNAIATCDWTNAGDYILA | 5424 |
| TR       | Q6UZF1 Q6UZF1_CVHSA         | YLGGMSSYYCKSHKPPISFPLCANGQVFGLYKNTCVGSDNVDTDFNAIATCDWTNAGDYILA | 5424 |
| TR       | Q6JH48 Q6JH48_CVHSA         | YLGGMSSYYCKSHKPPISFPLCANGQVFGLYKNTCVGSDNVDTDFNAIATCDWTNAGDYILA | 5424 |
| TR       | Q692E6 Q692E6_CVHSA         | YLGGMSSYYCKSHKPPISFPLCANGQVFGLYKNTCVGSDNVDTDFNAIATCDWTNAGDYILA | 5424 |
| TR       | A0A0K1YZY7 A0A0K1YZY7_CVHSA | YLGGMSSYYCKSHKPPISFPLCANGQVFGLYKNTCVGSDNVDTDFNAIATCDWTNAGDYILA | 5424 |
| SP       | P0C6W2 R1AB_BCHK3           | YLGGMSSYYCKSHKPPISFPLCANGQVFGLYKNTCVGSDNVDTDFNAIATCDWTNAGDYILA | 5418 |
| SP       | P0C6W6 R1AB_BCRP3           | YLGGMSSYYCKSHKPPISFPLCANGQVFGLYKNTCVGSDNVDTDFNAIATCDWTNAGDYILA | 5422 |
| SP       | P0C6V9 R1AB_BC279           | YLGGMSSYYCKSHKPPISFPLCANGQVFGLYKNTCVGSDNVDTDFNAIATCDWTNAGDYILA | 5430 |
| TR       | A0A0U1WHI4 A0A0U1WHI4_CVHSA | YLGGMSSYYCKSHKPPISFPLCANGQVFGLYKNTCVGSDNVDTDFNAIATCDWTNAGDYILA | 5419 |
| TR       | A0A0U1WHG0 A0A0U1WHG0_CVHSA | YLGGMSSYYCKSHKPPISFPLCANGQVFGLYKNTCVGSDNVDTDFNAIATCDWTNAGDYILA | 5419 |
| TR       | A0A166ZL34 A0A166ZL34_9NIDO | YLGGMSSYYCKSHKPPISFPLCANGQVFGLYKNTCVGSDNVDTDFNAIATCDWTNAGDYILA | 5226 |
| TR       | R9QTB2 R9QTB2_CVHSA         | -----                                                          |      |
| TR       | R9QTH2 R9QTH2_CVHSA         | -----                                                          |      |
| SP       | P0C6U8 R1A_CVHSA            | -----                                                          |      |
| TR       | Q6JH47 Q6JH47_CVHSA         | -----                                                          |      |
| TR       | Q692E5 Q692E5_CVHSA         | -----                                                          |      |
| SP       | P0C6F8 R1A_BCHK3            | -----                                                          |      |
| TR       | A0A0K1Z0N1 A0A0K1Z0N1_CVHSA | -----                                                          |      |
| SP       | P0C6F5 R1A_BC279            | -----                                                          |      |
| SP       | P0C6T7 R1A_BCRP3            | -----                                                          |      |

|          |                             |                                                             |      |
|----------|-----------------------------|-------------------------------------------------------------|------|
| QHN73794 |                             | NTCTERLKLFAAETLKATEETFKLSYGIATVREVLSRELHLSWEVGKPRPPLNRRNVFT | 5507 |
| SP       | P0C6X7 R1AB_CVHSA           | NTCTERLKLFAAETLKATEETFKLSYGIATVREVLSRELHLSWEVGKPRPPLNRRNVFT | 5484 |
| TR       | Q6UZF5 Q6UZF5_CVHSA         | NTCTERLKLFAAETLKATEETFKLSYGIATVREVLSRELHLSWEVGKPRPPLNRRNVFT | 5484 |
| TR       | Q6UZF1 Q6UZF1_CVHSA         | NTCTERLKLFAAETLKATEETFKLSYGIATVREVLSRELHLSWEVGKPRPPLNRRNVFT | 5484 |
| TR       | Q6JH48 Q6JH48_CVHSA         | NTCTERLKLFAAETLKATEETFKLSYGIATVREVLSRELHLSWEVGKPRPPLNRRNVFT | 5484 |
| TR       | Q692E6 Q692E6_CVHSA         | NTCTERLKLFAAETLKATEETFKLSYGIATVREVLSRELHLSWEVGKPRPPLNRRNVFT | 5484 |
| TR       | A0A0K1YZY7 A0A0K1YZY7_CVHSA | NTCTERLKLFAAETLKATEETFKLSYGIATVREVLSRELHLSWEVGKPRPPLNRRNVFT | 5484 |
| SP       | P0C6W2 R1AB_BCHK3           | NTCTERLKLFAAETLKATEETFKLSYGIATVREVLSRELHLSWEVGKPRPPLNRRNVFT | 5478 |
| SP       | P0C6W6 R1AB_BCRP3           | NTCTERLKLFAAETLKATEETFKLSYGIATVREVLSRELHLSWEVGKPRPPLNRRNVFT | 5482 |
| SP       | P0C6V9 R1AB_BC279           | NTCTERLKLFAAETLKATEETFKLSYGIATVREVLSRELHLSWEVGKPRPPLNRRNVFT | 5490 |
| TR       | A0A0U1WHI4 A0A0U1WHI4_CVHSA | NTCTERLKLFAAETLKATEETFKLSYGIATVREVLSRELHLSWEVGKPRPPLNRRNVFT | 5479 |
| TR       | A0A0U1WHG0 A0A0U1WHG0_CVHSA | NTCTERLKLFAAETLKATEETFKLSYGIATVREVLSRELHLSWEVGKPRPPLNRRNVFT | 5479 |
| TR       | A0A166ZL34 A0A166ZL34_9NIDO | NTCTERLKLFAAETLKATEETFKLSYGIATVREVLSRELHLSWEVGKPRPPLNRRNVFT | 5286 |
| TR       | R9QTB2 R9QTB2_CVHSA         | -----                                                       |      |
| TR       | R9QTH2 R9QTH2_CVHSA         | -----                                                       |      |
| SP       | P0C6U8 R1A_CVHSA            | -----                                                       |      |
| TR       | Q6JH47 Q6JH47_CVHSA         | -----                                                       |      |
| TR       | Q692E5 Q692E5_CVHSA         | -----                                                       |      |
| SP       | P0C6F8 R1A_BCHK3            | -----                                                       |      |
| TR       | A0A0K1Z0N1 A0A0K1Z0N1_CVHSA | -----                                                       |      |
| SP       | P0C6F5 R1A_BC279            | -----                                                       |      |
| SP       | P0C6T7 R1A_BCRP3            | -----                                                       |      |

|          |                             |                                                              |      |
|----------|-----------------------------|--------------------------------------------------------------|------|
| QHN73794 |                             | GYRVTKNSKVQIGEYTFEKGDYGDVAVYRGTTTYKLVNGDYFVLTSHTVMPLSAPTLVPQ | 5567 |
| SP       | P0C6X7 R1AB_CVHSA           | GYRVTKNSKVQIGEYTFEKGDYGDVAVYRGTTTYKLVNGDYFVLTSHTVMPLSAPTLVPQ | 5544 |
| TR       | Q6UZF5 Q6UZF5_CVHSA         | GYRVTKNSKVQIGEYTFEKGDYGDVAVYRGTTTYKLVNGDYFVLTSHTVMPLSAPTLVPQ | 5544 |
| TR       | Q6UZF1 Q6UZF1_CVHSA         | GYRVTKNSKVQIGEYTFEKGDYGDVAVYRGTTTYKLVNGDYFVLTSHTVMPLSAPTLVPQ | 5544 |
| TR       | Q6JH48 Q6JH48_CVHSA         | GYRVTKNSKVQIGEYTFEKGDYGDVAVYRGTTTYKLVNGDYFVLTSHTVMPLSAPTLVPQ | 5544 |
| TR       | Q692E6 Q692E6_CVHSA         | GYRVTKNSKVQIGEYTFEKGDYGDVAVYRGTTTYKLVNGDYFVLTSHTVMPLSAPTLVPQ | 5544 |
| TR       | A0A0K1YZY7 A0A0K1YZY7_CVHSA | GYRVTKNSKVQIGEYTFEKGDYGDVAVYRGTTTYKLVNGDYFVLTSHTVMPLSAPTLVPQ | 5544 |
| SP       | P0C6W2 R1AB_BCHK3           | GYRVTKNSKVQIGEYTFEKGDYGDVAVYRGTTTYKLVNGDYFVLTSHTVMPLSAPTLVPQ | 5538 |
| SP       | P0C6W6 R1AB_BCRP3           | GYRVTKNSKVQIGEYTFEKGDYGDVAVYRGTTTYKLVNGDYFVLTSHTVMPLSAPTLVPQ | 5542 |
| SP       | P0C6V9 R1AB_BC279           | GYRVTKNSKVQIGEYTFEKGDYGDVAVYRGTTTYKLVNGDYFVLTSHTVMPLSAPTLVPQ | 5550 |
| TR       | A0A0U1WHI4 A0A0U1WHI4_CVHSA | GYRVTKNSKVQIGEYTFEKGDYGDVAVYRGTTTYKLVNGDYFVLTSHTVMPLSAPTLVPQ | 5539 |
| TR       | A0A0U1WHG0 A0A0U1WHG0_CVHSA | GYRVTKNSKVQIGEYTFEKGDYGDVAVYRGTTTYKLVNGDYFVLTSHTVMPLSAPTLVPQ | 5539 |
| TR       | A0A166ZL34 A0A166ZL34_9NIDO | GYRVTKNSKVQIGEYTFEKGDYGDVAVYRGTTTYKLVNGDYFVLTSHTVMPLSAPTLVPQ | 5346 |
| TR       | R9QTB2 R9QTB2_CVHSA         | -----                                                        |      |
| TR       | R9QTH2 R9QTH2_CVHSA         | -----                                                        |      |
| SP       | P0C6U8 R1A_CVHSA            | -----                                                        |      |
| TR       | Q6JH47 Q6JH47_CVHSA         | -----                                                        |      |
| TR       | Q692E5 Q692E5_CVHSA         | -----                                                        |      |
| SP       | P0C6F8 R1A_BCHK3            | -----                                                        |      |
| TR       | A0A0K1Z0N1 A0A0K1Z0N1_CVHSA | -----                                                        |      |
| SP       | P0C6F5 R1A_BC279            | -----                                                        |      |
| SP       | P0C6T7 R1A_BCRP3            | -----                                                        |      |

|          |                             |                                                               |      |
|----------|-----------------------------|---------------------------------------------------------------|------|
| QHN73794 |                             | EHYVRITGLYPTLNISDEFSSNVANYQKVGMMQKYSTLQGGPGTGKSHFAIGLALYYPSAR | 5627 |
| SP       | P0C6X7 R1AB_CVHSA           | EHYVRITGLYPTLNISDEFSSNVANYQKVGMMQKYSTLQGGPGTGKSHFAIGLALYYPSAR | 5604 |
| TR       | Q6UZF5 Q6UZF5_CVHSA         | EHYVRITGLYPTLNISDEFSSNVANYQKVGMMQKYSTLQGGPGTGKSHFAIGLALYYPSAR | 5604 |
| TR       | Q6UZF1 Q6UZF1_CVHSA         | EHYVRITGLYPTLNISDEFSSNVANYQKVGMMQKYSTLQGGPGTGKSHFAIGLALYYPSAR | 5604 |
| TR       | Q6JH48 Q6JH48_CVHSA         | EHYVRITGLYPTLNISDEFSSNVANYQKVGMMQKYSTLQGGPGTGKSHFAIGLALYYPSAR | 5604 |
| TR       | Q692E6 Q692E6_CVHSA         | EHYVRITGLYPTLNISDEFSSNVANYQKVGMMQKYSTLQGGPGTGKSHFAIGLALYYPSAR | 5604 |
| TR       | A0A0K1YZY7 A0A0K1YZY7_CVHSA | EHYVRITGLYPTLNISDEFSSNVANYQKVGMMQKYSTLQGGPGTGKSHFAIGLALYYPSAR | 5604 |
| SP       | P0C6W2 R1AB_BCHK3           | EHYVRITGLYPTLNISDEFSSNVANYQKVGMMQKYSTLQGGPGTGKSHFAIGLALYYPSAR | 5598 |
| SP       | P0C6W6 R1AB_BCRP3           | EHYVRITGLYPTLNISDEFSSNVANYQKVGMMQKYSTLQGGPGTGKSHFAIGLALYYPSAR | 5602 |
| SP       | P0C6V9 R1AB_BC279           | EHYVRITGLYPTLNISDEFSSNVANYQKVGMMQKYSTLQGGPGTGKSHFAIGLALYYPSAR | 5610 |
| TR       | A0A0U1WHI4 A0A0U1WHI4_CVHSA | EHYVRITGLYPTLNISDEFSSNVANYQKVGMMQKYSTLQGGPGTGKSHFAIGLALYYPSAR | 5599 |
| TR       | A0A0U1WHG0 A0A0U1WHG0_CVHSA | EHYVRITGLYPTLNISDEFSSNVANYQKVGMMQKYSTLQGGPGTGKSHFAIGLALYYPSAR | 5599 |
| TR       | A0A166ZL34 A0A166ZL34_9NIDO | EHYVRITGLYPTLNISDEFSSNVANYQKVGMMQKYSTLQGGPGTGKSHFAIGLALYYPSAR | 5406 |
| TR       | R9QTB2 R9QTB2_CVHSA         | -----                                                         |      |
| TR       | R9QTH2 R9QTH2_CVHSA         | -----                                                         |      |
| SP       | P0C6U8 R1A_CVHSA            | -----                                                         |      |
| TR       | Q6JH47 Q6JH47_CVHSA         | -----                                                         |      |
| TR       | Q692E5 Q692E5_CVHSA         | -----                                                         |      |
| SP       | P0C6F8 R1A_BCHK3            | -----                                                         |      |
| TR       | A0A0K1Z0N1 A0A0K1Z0N1_CVHSA | -----                                                         |      |
| SP       | P0C6F5 R1A_BC279            | -----                                                         |      |
| SP       | P0C6T7 R1A_BCRP3            | -----                                                         |      |

|          |                             |                                                              |      |
|----------|-----------------------------|--------------------------------------------------------------|------|
| QHN73794 |                             | IVYTACSHAAVDALCEKALKYLPIDKCSRIIPARARVECFDKFKVNSTLEQYVFCTVNAL | 5687 |
| SP       | P0C6X7 R1AB_CVHSA           | IVYTACSHAAVDALCEKALKYLPIDKCSRIIPARARVECFDKFKVNSTLEQYVFCTVNAL | 5664 |
| TR       | Q6UZF5 Q6UZF5_CVHSA         | IVYTACSHAAVDALCEKALKYLPIDKCSRIIPARARVECFDKFKVNSTLEQYVFCTVNAL | 5664 |
| TR       | Q6UZF1 Q6UZF1_CVHSA         | IVYTACSHAAVDALCEKALKYLPIDKCSRIIPARARVECFDKFKVNSTLEQYVFCTVNAL | 5664 |
| TR       | Q6JH48 Q6JH48_CVHSA         | IVYTACSHAAVDALCEKALKYLPIDKCSRIIPARARVECFDKFKVNSTLEQYVFCTVNAL | 5664 |
| TR       | Q692E6 Q692E6_CVHSA         | IVYTACSHAAVDALCEKALKYLPIDKCSRIIPARARVECFDKFKVNSTLEQYVFCTVNAL | 5664 |
| TR       | A0A0K1YZY7 A0A0K1YZY7_CVHSA | IVYTACSHAAVDALCEKALKYLPIDKCSRIIPARARVECFDKFKVNSTLEQYVFCTVNAL | 5664 |
| SP       | P0C6W2 R1AB_BCHK3           | IVYTACSHAAVDALCEKALKYLPIDKCSRIIPARARVECFDKFKVNSTLEQYVFCTVNAL | 5658 |
| SP       | P0C6W6 R1AB_BCRP3           | IVYTACSHAAVDALCEKALKYLPIDKCSRIIPARARVECFDKFKVNSTLEQYVFCTVNAL | 5662 |
| SP       | P0C6V9 R1AB_BC279           | IVYTACSHAAVDALCEKALKYLPIDKCSRIIPARARVECFDKFKVNSTLEQYVFCTVNAL | 5670 |
| TR       | A0A0U1WHI4 A0A0U1WHI4_CVHSA | IVYTACSHAAVDALCEKALKYLPIDKCSRIIPARARVECFDKFKVNSTLEQYVFCTVNAL | 5659 |
| TR       | A0A0U1WHG0 A0A0U1WHG0_CVHSA | IVYTACSHAAVDALCEKALKYLPIDKCSRIIPARARVECFDKFKVNSTLEQYVFCTVNAL | 5659 |
| TR       | A0A166ZL34 A0A166ZL34_9NIDO | IVYTACSHAAVDALCEKALKYLPIDKCSRIIPARARVECFDKFKVNSTLEQYVFCTVNAL | 5466 |
| TR       | R9QTB2 R9QTB2_CVHSA         | -----                                                        |      |
| TR       | R9QTH2 R9QTH2_CVHSA         | -----                                                        |      |
| SP       | P0C6U8 R1A_CVHSA            | -----                                                        |      |
| TR       | Q6JH47 Q6JH47_CVHSA         | -----                                                        |      |
| TR       | Q692E5 Q692E5_CVHSA         | -----                                                        |      |
| SP       | P0C6F8 R1A_BCHK3            | -----                                                        |      |
| TR       | A0A0K1Z0N1 A0A0K1Z0N1_CVHSA | -----                                                        |      |
| SP       | P0C6F5 R1A_BC279            | -----                                                        |      |
| SP       | P0C6T7 R1A_BCRP3            | -----                                                        |      |

|          |                             |                                                               |      |
|----------|-----------------------------|---------------------------------------------------------------|------|
| QHN73794 |                             | PETTADIVVFDEISMATNYDLSVNNARLRAKHVYVYIGDPAQLPAPRTLLTKGTLEPEYFN | 5747 |
| SP       | P0C6X7 R1AB_CVHSA           | PETTADIVVFDEISMATNYDLSVNNARLRAKHVYVYIGDPAQLPAPRTLLTKGTLEPEYFN | 5724 |
| TR       | Q6UZF5 Q6UZF5_CVHSA         | PETTADIVVFDEISMATNYDLSVNNARLRAKHVYVYIGDPAQLPAPRTLLTKGTLEPEYFN | 5724 |
| TR       | Q6UZF1 Q6UZF1_CVHSA         | PETTADIVVFDEISMATNYDLSVNNARLRAKHVYVYIGDPAQLPAPRTLLTKGTLEPEYFN | 5724 |
| TR       | Q6JH48 Q6JH48_CVHSA         | PETTADIVVFDEISMATNYDLSVNNARLRAKHVYVYIGDPAQLPAPRTLLTKGTLEPEYFN | 5724 |
| TR       | Q692E6 Q692E6_CVHSA         | PETTADIVVFDEISMATNYDLSVNNARLRAKHVYVYIGDPAQLPAPRTLLTKGTLEPEYFN | 5724 |
| TR       | A0A0K1YZY7 A0A0K1YZY7_CVHSA | PETTADIVVFDEISMATNYDLSVNNARLRAKHVYVYIGDPAQLPAPRTLLTKGTLEPEYFN | 5724 |
| SP       | P0C6W2 R1AB_BCHK3           | PETTADIVVFDEISMATNYDLSVNNARLRAKHVYVYIGDPAQLPAPRTLLTKGTLEPEYFN | 5718 |
| SP       | P0C6W6 R1AB_BCRP3           | PETTADIVVFDEISMATNYDLSVNNARLRAKHVYVYIGDPAQLPAPRTLLTKGTLEPEYFN | 5722 |
| SP       | P0C6V9 R1AB_BC279           | PETTADIVVFDEISMATNYDLSVNNARLRAKHVYVYIGDPAQLPAPRTLLTKGTLEPEYFN | 5730 |
| TR       | A0A0U1WHI4 A0A0U1WHI4_CVHSA | PETTADIVVFDEISMATNYDLSVNNARLRAKHVYVYIGDPAQLPAPRTLLTKGTLEPEYFN | 5719 |
| TR       | A0A0U1WHG0 A0A0U1WHG0_CVHSA | PETTADIVVFDEISMATNYDLSVNNARLRAKHVYVYIGDPAQLPAPRTLLTKGTLEPEYFN | 5719 |
| TR       | A0A166ZL34 A0A166ZL34_9NIDO | PETTADIVVFDEISMATNYDLSVNNARLRAKHVYVYIGDPAQLPAPRTLLTKGTLEPEYFN | 5526 |
| TR       | R9QTB2 R9QTB2_CVHSA         | -----                                                         |      |
| TR       | R9QTH2 R9QTH2_CVHSA         | -----                                                         |      |
| SP       | P0C6U8 R1A_CVHSA            | -----                                                         |      |
| TR       | Q6JH47 Q6JH47_CVHSA         | -----                                                         |      |
| TR       | Q692E5 Q692E5_CVHSA         | -----                                                         |      |
| SP       | P0C6F8 R1A_BCHK3            | -----                                                         |      |
| TR       | A0A0K1Z0N1 A0A0K1Z0N1_CVHSA | -----                                                         |      |
| SP       | P0C6F5 R1A_BC279            | -----                                                         |      |
| SP       | P0C6T7 R1A_BCRP3            | -----                                                         |      |

|          |                             |                                                             |      |
|----------|-----------------------------|-------------------------------------------------------------|------|
| QHN73794 |                             | SVCRLMKTIGPDMFLGTCRRCPAEIVDTVSAVYDNKLKAHKDKSAQCCKMFYKGVITHD | 5807 |
| SP       | P0C6X7 R1AB_CVHSA           | SVCRLMKTIGPDMFLGTCRRCPAEIVDTVSAVYDNKLKAHKDKSAQCCKMFYKGVITHD | 5784 |
| TR       | Q6UZF5 Q6UZF5_CVHSA         | SVCRLMKTIGPDMFLGTCRRCPAEIVDTVSAVYDNKLKAHKDKSAQCCKMFYKGVITHD | 5784 |
| TR       | Q6UZF1 Q6UZF1_CVHSA         | SVCRLMKTIGPDMFLGTCRRCPAEIVDTVSAVYDNKLKAHKDKSAQCCKMFYKGVITHD | 5784 |
| TR       | Q6JH48 Q6JH48_CVHSA         | SVCRLMKTIGPDMFLGTCRRCPAEIVDTVSAVYDNKLKAHKDKSAQCCKMFYKGVITHD | 5784 |
| TR       | Q692E6 Q692E6_CVHSA         | SVCRLMKTIGPDMFLGTCRRCPAEIVDTVSAVYDNKLKAHKDKSAQCCKMFYKGVITHD | 5784 |
| TR       | A0A0K1YZY7 A0A0K1YZY7_CVHSA | SVCRLMKTIGPDMFLGTCRRCPAEIVDTVSAVYDNKLKAHKDKSAQCCKMFYKGVITHD | 5784 |
| SP       | P0C6W2 R1AB_BCHK3           | SVCRLMKTIGPDMFLGTCRRCPAEIVDTVSAVYDNKLKAHKDKSAQCCKMFYKGVITHD | 5778 |
| SP       | P0C6W6 R1AB_BCRP3           | SVCRLMKTIGPDMFLGTCRRCPAEIVDTVSAVYDNKLKAHKDKSAQCCKMFYKGVITHD | 5782 |
| SP       | P0C6V9 R1AB_BC279           | SVCRLMKTIGPDMFLGTCRRCPAEIVDTVSAVYDNKLKAHKDKSAQCCKMFYKGVITHD | 5790 |
| TR       | A0A0U1WHI4 A0A0U1WHI4_CVHSA | SVCRLMKTIGPDMFLGTCRRCPAEIVDTVSAVYDNKLKAHKDKSAQCCKMFYKGVITHD | 5779 |
| TR       | A0A0U1WHG0 A0A0U1WHG0_CVHSA | SVCRLMKTIGPDMFLGTCRRCPAEIVDTVSAVYDNKLKAHKDKSAQCCKMFYKGVITHD | 5779 |
| TR       | A0A166ZL34 A0A166ZL34_9NIDO | SVCRLMKTIGPDMFLGTCRRCPAEIVDTVSAVYDNKLKAHKDKSAQCCKMFYKGVITHD | 5586 |
| TR       | R9QTB2 R9QTB2_CVHSA         | -----                                                       |      |
| TR       | R9QTH2 R9QTH2_CVHSA         | -----                                                       |      |
| SP       | P0C6U8 R1A_CVHSA            | -----                                                       |      |
| TR       | Q6JH47 Q6JH47_CVHSA         | -----                                                       |      |
| TR       | Q692E5 Q692E5_CVHSA         | -----                                                       |      |
| SP       | P0C6F8 R1A_BCHK3            | -----                                                       |      |
| TR       | A0A0K1Z0N1 A0A0K1Z0N1_CVHSA | -----                                                       |      |
| SP       | P0C6F5 R1A_BC279            | -----                                                       |      |
| SP       | P0C6T7 R1A_BCRP3            | -----                                                       |      |

QHN73794 VSSAINRPQIGVVREFLTRNPAWRKAVFISPYNSQNAVASKILGLPTQTVDSSQGSEYDY 5867  
SP P0C6X7 R1AB\_CVHSA VSSAINRPQIGVVREFLTRNPAWRKAVFISPYNSQNAVASKILGLPTQTVDSSQGSEYDY 5844  
TR Q6UZF5 Q6UZF5\_CVHSA VSSAINRPQIGVVREFLTRNPAWRKAVFISPYNSQNAVASKILGLPTQTVDSSQGSEYDY 5844  
TR Q6UZF1 Q6UZF1\_CVHSA VSSAINRPQIGVVREFLTRNPAWRKAVFISPYNSQNAVASKILGLPTQTVDSSQGSEYDY 5844  
TR Q6JH48 Q6JH48\_CVHSA VSSAINRPQIGVVREFLTRNPAWRKAVFISPYNSQNAVASKILGLPTQTVDSSQGSEYDY 5844  
TR Q692E6 Q692E6\_CVHSA VSSAINRPQIGVVREFLTRNPAWRKAVFISPYNSQNAVASKILGLPTQTVDSSQGSEYDY 5844  
TR A0A0K1YZY7 A0A0K1YZY7\_CVHSA VSSAINRPQIGVVREFLTRNPAWRKAVFISPYNSQNAVASKILGLPTQTVDSSQGSEYDY 5844  
SP P0C6W2 R1AB\_BCHK3 VSSAINRPQIGVVREFLTRNPAWRKAVFISPYNSQNAVASKILGLPTQTVDSSQGSEYDY 5838  
SP P0C6W6 R1AB\_BCRP3 VSSAINRPQIGVVREFLTRNPAWRKAVFISPYNSQNAVASKILGLPTQTVDSSQGSEYDY 5842  
SP P0C6V9 R1AB\_BC279 VSSAINRPQIGVVREFLTRNPAWRKAVFISPYNSQNAVASKILGLPTQTVDSSQGSEYDY 5850  
TR A0A0U1WHI4 A0A0U1WHI4\_CVHSA VSSAINRPQIGVVREFLTRNPAWRKAVFISPYNSQNAVASKILGLPTQTVDSSQGSEYDY 5839  
TR A0A0U1WHG0 A0A0U1WHG0\_CVHSA VSSAINRPQIGVVREFLTRNPAWRKAVFISPYNSQNAVASKILGLPTQTVDSSQGSEYDY 5839  
TR A0A166ZL34 A0A166ZL34\_9NIDO VSSAINRPQIGVVREFLTRNPAWRKAVFISPYNSQNAVASKILGLPTQTVDSSQGSEYDY 5646  
TR R9QTB2 R9QTB2\_CVHSA -----  
TR R9QTH2 R9QTH2\_CVHSA -----  
SP P0C6U8 R1A\_CVHSA -----  
TR Q6JH47 Q6JH47\_CVHSA -----  
TR Q692E5 Q692E5\_CVHSA -----  
SP P0C6F8 R1A\_BCHK3 -----  
TR A0A0K1Z0N1 A0A0K1Z0N1\_CVHSA -----  
SP P0C6F5 R1A\_BC279 -----  
SP P0C6T7 R1A\_BCRP3 -----

QHN73794 VIFTQTTTETAHSCNVNRFNVAITRAKIGILCIMSDDRDLYDKLQFTSLEIPRRNVATLQAE 5927  
SP P0C6X7 R1AB\_CVHSA VIFTQTTTETAHSCNVNRFNVAITRAKIGILCIMSDDRDLYDKLQFTSLEIPRRNVATLQAE 5904  
TR Q6UZF5 Q6UZF5\_CVHSA VIFTQTTTETAHSCNVNRFNVAITRAKIGILCIMSDDRDLYDKLQFTSLEIPRRNVATLQAE 5904  
TR Q6UZF1 Q6UZF1\_CVHSA VIFTQTTTETAHSCNVNRFNVAITRAKIGILCIMSDDRDLYDKLQFTSLEIPRRNVATLQAE 5904  
TR Q6JH48 Q6JH48\_CVHSA VIFTQTTTETAHSCNVNRFNVAITRAKIGILCIMSDDRDLYDKLQFTSLEIPRRNVATLQAE 5904  
TR Q692E6 Q692E6\_CVHSA VIFTQTTTETAHSCNVNRFNVAITRAKIGILCIMSDDRDLYDKLQFTSLEIPRRNVATLQAE 5904  
TR A0A0K1YZY7 A0A0K1YZY7\_CVHSA VIFTQTTTETAHSCNVNRFNVAITRAKIGILCIMSDDRDLYDKLQFTSLEIPRRNVATLQAE 5904  
SP P0C6W2 R1AB\_BCHK3 VIFTQTTTETAHSCNVNRFNVAITRAKIGILCIMSDDRDLYDKLQFTSLEIPRRNVATLQAE 5898  
SP P0C6W6 R1AB\_BCRP3 VIFTQTTTETAHSCNVNRFNVAITRAKIGILCIMSDDRDLYDKLQFTSLEIPRRNVATLQAE 5902  
SP P0C6V9 R1AB\_BC279 VIFTQTTTETAHSCNVNRFNVAITRAKIGILCIMSDDRDLYDKLQFTSLEIPRRNVATLQAE 5910  
TR A0A0U1WHI4 A0A0U1WHI4\_CVHSA VIFTQTTTETAHSCNVNRFNVAITRAKIGILCIMSDDRDLYDKLQFTSLEIPRRNVATLQAE 5899  
TR A0A0U1WHG0 A0A0U1WHG0\_CVHSA VIFTQTTTETAHSCNVNRFNVAITRAKIGILCIMSDDRDLYDKLQFTSLEIPRRNVATLQAE 5899  
TR A0A166ZL34 A0A166ZL34\_9NIDO VIFTQTTTETAHSCNVNRFNVAITRAKIGILCIMSDDRDLYDKLQFTSLEIPRRNVATLQAE 5706  
TR R9QTB2 R9QTB2\_CVHSA -----  
TR R9QTH2 R9QTH2\_CVHSA -----  
SP P0C6U8 R1A\_CVHSA -----  
TR Q6JH47 Q6JH47\_CVHSA -----  
TR Q692E5 Q692E5\_CVHSA -----  
SP P0C6F8 R1A\_BCHK3 -----  
TR A0A0K1Z0N1 A0A0K1Z0N1\_CVHSA -----  
SP P0C6F5 R1A\_BC279 -----  
SP P0C6T7 R1A\_BCRP3 -----

QHN73794 NVTGLFKDCSKVITGLHPTQAPTHLSVDTKFKTEGLCVDIPGIPKDMTYRRLISMMGFKM 5987  
SP P0C6X7 R1AB\_CVHSA NVTGLFKDCSKVITGLHPTQAPTHLSVDTKFKTEGLCVDIPGIPKDMTYRRLISMMGFKM 5964  
TR Q6UZF5 Q6UZF5\_CVHSA NVTGLFKDCSKVITGLHPTQAPTHLSVDTKFKTEGLCVDIPGIPKDMTYRRLISMMGFKM 5964  
TR Q6UZF1 Q6UZF1\_CVHSA NVTGLFKDCSKVITGLHPTQAPTHLSVDTKFKTEGLCVDIPGIPKDMTYRRLISMMGFKM 5964  
TR Q6JH48 Q6JH48\_CVHSA NVTGLFKDCSKVITGLHPTQAPTHLSVDTKFKTEGLCVDIPGIPKDMTYRRLISMMGFKM 5964  
TR Q692E6 Q692E6\_CVHSA NVTGLFKDCSKVITGLHPTQAPTHLSVDTKFKTEGLCVDIPGIPKDMTYRRLISMMGFKM 5964  
TR A0A0K1YZY7 A0A0K1YZY7\_CVHSA NVTGLFKDCSKVITGLHPTQAPTHLSVDTKFKTEGLCVDIPGIPKDMTYRRLISMMGFKM 5964  
SP P0C6W2 R1AB\_BCHK3 NVTGLFKDCSKVITGLHPTQAPTHLSVDTKFKTEGLCVDIPGIPKDMTYRRLISMMGFKM 5958  
SP P0C6W6 R1AB\_BCRP3 NVTGLFKDCSKVITGLHPTQAPTHLSVDTKFKTEGLCVDIPGIPKDMTYRRLISMMGFKM 5962  
SP P0C6V9 R1AB\_BC279 NVTGLFKDCSKVITGLHPTQAPTHLSVDTKFKTEGLCVDIPGIPKDMTYRRLISMMGFKM 5970  
TR A0A0U1WHI4 A0A0U1WHI4\_CVHSA NVTGLFKDCSKVITGLHPTQAPTHLSVDTKFKTEGLCVDIPGIPKDMTYRRLISMMGFKM 5959  
TR A0A0U1WHG0 A0A0U1WHG0\_CVHSA NVTGLFKDCSKVITGLHPTQAPTHLSVDTKFKTEGLCVDIPGIPKDMTYRRLISMMGFKM 5959  
TR A0A166ZL34 A0A166ZL34\_9NIDO NVTGLFKDCSKVITGLHPTQAPTHLSVDTKFKTEGLCVDIPGIPKDMTYRRLISMMGFKM 5766  
TR R9QTB2 R9QTB2\_CVHSA -----  
TR R9QTH2 R9QTH2\_CVHSA -----  
SP P0C6U8 R1A\_CVHSA -----  
TR Q6JH47 Q6JH47\_CVHSA -----  
TR Q692E5 Q692E5\_CVHSA -----  
SP P0C6F8 R1A\_BCHK3 -----  
TR A0A0K1Z0N1 A0A0K1Z0N1\_CVHSA -----  
SP P0C6F5 R1A\_BC279 -----  
SP P0C6T7 R1A\_BCRP3 -----



QHN73794  
SP P0C6X7 | R1AB\_CVHSA  
TR Q6UZF5 | Q6UZF5\_CVHSA  
TR Q6UZF1 | Q6UZF1\_CVHSA  
TR Q6JH48 | Q6JH48\_CVHSA  
TR Q692E6 | Q692E6\_CVHSA  
TR A0A0K1YZY7 | A0A0K1YZY7\_CVHSA  
SP P0C6W2 | R1AB\_BCHK3  
SP P0C6W6 | R1AB\_BCRP3  
SP P0C6V9 | R1AB\_BC279  
TR A0A0U1WHI4 | A0A0U1WHI4\_CVHSA  
TR A0A0U1WHG0 | A0A0U1WHG0\_CVHSA  
TR A0A166ZL34 | A0A166ZL34\_9NIDO  
TR R9QTB2 | R9QTB2\_CVHSA  
TR R9QTH2 | R9QTH2\_CVHSA  
SP P0C6U8 | R1A\_CVHSA  
TR Q6JH47 | Q6JH47\_CVHSA  
TR Q692E5 | Q692E5\_CVHSA  
SP P0C6F8 | R1A\_BCHK3  
TR A0A0K1Z0N1 | A0A0K1Z0N1\_CVHSA  
SP P0C6F5 | R1A\_BC279  
SP P0C6T7 | R1A\_BCRP3

NYQVNGYPNMFITREEAIRHVRAWIGFDVEGCHATREAVGTNLPLQLGFSTGVNLVAVPT 6047  
NYQVNGYPNMFITREEAIRHVRAWIGFDVEGCHATRDVGTNLPLQLGFSTGVNLVAVPT 6024  
NYQVNGYPNMFITREEAIRHVRAWIGFDVEGCHATRDVGTNLPLQLGFSTGVNLVAVPT 6024  
NYQVNGYPNMFITREEAIRHVRAWIGFDVEGCHATRDVGTNLPLQLGFSTGVNLVAVPT 6024  
NYQVNGYPNMFITREEAIRHVRAWIGFDVEGCHATRDVGTNLPLQLGFSTGVNLVAVPT 6024  
NYQVNGYPNMFITREEAIRHVRAWIGFDVEGCHATRDVGTNLPLQLGFSTGVNLVAVPT 6024  
NYQVNGYPNMFITREEAIRHVRAWIGFDVEGCHATRDVGTNLPLQLGFSTGVNLVAVPT 6018  
NYQVNGYPNMFITREEAIRHVRAWIGFDVEGCHATRDVGTNLPLQLGFSTGVNLVAVPT 6022  
NYQVNGYPNMFITREEAIRHVRAWIGFDVEGCHATRDVGTNLPLQLGFSTGVNLVAVPT 6030  
NYQVNGYPNMFITREEAIRHVRAWIGFDVEGCHATRDVGTNLPLQLGFSTGVNLVAVPT 6019  
NYQVNGYPNMFITREEAIRHVRAWIGFDVEGCHATRDVGTNLPLQLGFSTGVNLVAVPT 6019  
NYQVNGYPNMFITREEAIRHVRAWIGFDVEGCHATRDVGTNLPLQLGFSTGVNLVAVPT 5826

QHN73794  
SP P0C6X7 | R1AB\_CVHSA  
TR Q6UZF5 | Q6UZF5\_CVHSA  
TR Q6UZF1 | Q6UZF1\_CVHSA  
TR Q6JH48 | Q6JH48\_CVHSA  
TR Q692E6 | Q692E6\_CVHSA  
TR A0A0K1YZY7 | A0A0K1YZY7\_CVHSA  
SP P0C6W2 | R1AB\_BCHK3  
SP P0C6W6 | R1AB\_BCRP3  
SP P0C6V9 | R1AB\_BC279  
TR A0A0U1WHI4 | A0A0U1WHI4\_CVHSA  
TR A0A0U1WHG0 | A0A0U1WHG0\_CVHSA  
TR A0A166ZL34 | A0A166ZL34\_9NIDO  
TR R9QTB2 | R9QTB2\_CVHSA  
TR R9QTH2 | R9QTH2\_CVHSA  
SP P0C6U8 | R1A\_CVHSA  
TR Q6JH47 | Q6JH47\_CVHSA  
TR Q692E5 | Q692E5\_CVHSA  
SP P0C6F8 | R1A\_BCHK3  
TR A0A0K1Z0N1 | A0A0K1Z0N1\_CVHSA  
SP P0C6F5 | R1A\_BC279  
SP P0C6T7 | R1A\_BCRP3

GYVDTNNTDFSRVSAKPPPGDQFKHLIPLMYKGLPWNVVRKIVQMLSDTLKGLSDRVV 6107  
GYVDTENNTFTRVNAKPPPGDQFKHLIPLMYKGLPWNVVRKIVQMLSDTLKGLSDRVV 6084  
GYVDTENNTFTRVNAKPPPGDQFKHLIPLMYKGLPWNVVRKIVQMLSDTLKGLSDRVV 6084  
GYVDTENNTFTRVNAKPPPGDQFKHLIPLMYKGLPWNVVRKIVQMLSDTLKGLSDRVV 6084  
GYVDTENNTFTRVNAKPPPGDQFKHLIPLMYKGLPWNVVRKIVQMLSDTLKGLSDRVV 6084  
GYVDTENNTFTRVNAKPPPGDQFKHLIPLMYKGLPWNVVRKIVQMLSDTLKGLSDRVV 6084  
GYVDTENNTFTRVNAKPPPGDQFKHLIPLMYKGLPWNVVRKIVQMLSDTLKGLSDRVV 6078  
GYVDTENNTFTRVNAKPPPGDQFKHLIPLMYKGLPWNVVRKIVQMLSDTLKGLSDRVV 6082  
GYVDTENNTFTRVNAKPPPGDQFKHLIPLMYKGLPWNVVRKIVQMLSDTLKGLSDRVV 6090  
GYVDTENNTFTRVNAKPPPGDQFKHLIPLMYKGLPWNVVRKIVQMLSDTLKGLSDRVV 6079  
GYVDTENNTFTRVNAKPPPGDQFKHLIPLMYKGLPWSVVRKIVQMLSDTLKGLSDRVV 6079  
GYVDTENNTFTRVNAKPPPGDQFKHLIPLMYKGLPWSVVRKIVQMLSDTLKGLSDRVV 5886

QHN73794  
SP P0C6X7 | R1AB\_CVHSA  
TR Q6UZF5 | Q6UZF5\_CVHSA  
TR Q6UZF1 | Q6UZF1\_CVHSA  
TR Q6JH48 | Q6JH48\_CVHSA  
TR Q692E6 | Q692E6\_CVHSA  
TR A0A0K1YZY7 | A0A0K1YZY7\_CVHSA  
SP P0C6W2 | R1AB\_BCHK3  
SP P0C6W6 | R1AB\_BCRP3  
SP P0C6V9 | R1AB\_BC279  
TR A0A0U1WHI4 | A0A0U1WHI4\_CVHSA  
TR A0A0U1WHG0 | A0A0U1WHG0\_CVHSA  
TR A0A166ZL34 | A0A166ZL34\_9NIDO  
TR R9QTB2 | R9QTB2\_CVHSA  
TR R9QTH2 | R9QTH2\_CVHSA  
SP P0C6U8 | R1A\_CVHSA  
TR Q6JH47 | Q6JH47\_CVHSA  
TR Q692E5 | Q692E5\_CVHSA  
SP P0C6F8 | R1A\_BCHK3  
TR A0A0K1Z0N1 | A0A0K1Z0N1\_CVHSA  
SP P0C6F5 | R1A\_BC279  
SP P0C6T7 | R1A\_BCRP3

FVLWAHGFELTSMKYFVKIGPERTCCLCDRRATCFSTASDTYACWNHSGFDYVYNPFMI 6167  
FVLWAHGFELTSMKYFVKIGPERTCCLCDKRATCFSTSSDTYACWNHSGFDYVYNPFMI 6144  
FVLWAHGFELTSMKYFVKIGPERTCCLCDKRATCFSTSSDTYACWNHSGFDYVYNPFMI 6144  
FVLWAHGFELTSMKYFVKIGPERTCCLCDKRATCFSTSSDTYACWNHSGFDYVYNPFMI 6144  
FVLWAHGFELTSMKYFVKIGPERTCCLCDKRATCFSTSSDTYACWNHSGFDYVYNPFMI 6144  
FVLWAHGFELTSMKYFVKIGPERTCCLCDKRATCFSTSSDTYACWNHSGFDYVYNPFMI 6144  
FVLWAHGFELTSMKYFVKIGPERTCCLCDKRATCFSTSSDTYACWNHSGFDYVYNPFMI 6138  
FVLWAHGFELTSMKYFVKIGPERTCCLCDKRATCFSTSSDTYACWNHSGFDYVYNPFMI 6142  
FVLWAHGFELTSMKYFVKIGPERTCCLCDRRATCFSTSSDTYACWNHSGFDYVYNPFMI 6150  
FVLWAHGFELTSMKYFVKIGPERTCCLCDKRATCFSTSSDTYACWNHSGFDYVYNPFMI 6139  
FVLWAHGFELTSMKYFVKIGSERTCCLCDKRATCFSTSSDTYACWNHSGFDYVYNPFMI 6139  
FVLWAHGFELTSMKYFVKIGSERTCCLCDKRATCFSTSSDTYACWNHSGFDYVYNPFMI 5946

|          |                               |                                                                |      |
|----------|-------------------------------|----------------------------------------------------------------|------|
| QHN73794 |                               | DVQQWGF TGNLQSNHDLQCQVHGNAHVASCDAIMTRCLAVHECFVKRVDWDTIEYPIIGDE | 6227 |
| SP       | P0C6X7   R1AB_CVHSA           | DVQQWGF TGNLQSNHDLQCQVHGNAHVASCDAIMTRCLAVHECFVKRVDWSVEYPIIGDE  | 6204 |
| TR       | Q6UZF5   Q6UZF5_CVHSA         | DVQQWGF TGNLQSNHDLQCQVHGNAHVASCDAIMTRCLAVHECFVKRVDWSVEYPIIGDE  | 6204 |
| TR       | Q6UZF1   Q6UZF1_CVHSA         | DVQQWGF TGNLQSNHDLQCQVHGNAHVASCDAIMTRCLAVHECFVKRVDWSVEYPIIGDE  | 6204 |
| TR       | Q6JH48   Q6JH48_CVHSA         | DVQQWGF TGNLQSNHDLQCQVHGNAHVASCDAIMTRCLAVHECFVKRVDWSVEYPIIGDE  | 6204 |
| TR       | Q692E6   Q692E6_CVHSA         | DVQQWGF TGNLQSNHDLQCQVHGNAHVASCDAIMTRCLAVHECFVKRVDWSVEYPIIGDE  | 6204 |
| TR       | A0A0K1YZY7   A0A0K1YZY7_CVHSA | DVQQWGF TGNLQSNHDLQCQVHGNAHVASCDAIMTRCLAVHECFVKRVDWSVEYPIIGDE  | 6204 |
| SP       | P0C6W2   R1AB_BCHK3           | DVQQWGF TGNLQSNHDLQCQVHGNAHVASCDAIMTRCLAVHECFVKRVDWSVEYPIIGDE  | 6198 |
| SP       | P0C6W6   R1AB_BCRP3           | DVQQWGF TGNLQSNHDLQCQVHGNAHVASCDAIMTRCLAVHECFVKRVDWSVEYPIIGDE  | 6202 |
| SP       | P0C6V9   R1AB_BC279           | DVQQWGF TGNLQSNHDLQCQVHGNAHVASCDAIMTRCLAVHECFVKRVDWSVEYPIIGDE  | 6210 |
| TR       | A0A0U1WHI4   A0A0U1WHI4_CVHSA | DVQQWGL TGNLQSNHDLQCQVHGNAHVASCDAIMTRCLAVHECFVKRVDWSVEYPIIGDE  | 6199 |
| TR       | A0A0U1WHG0   A0A0U1WHG0_CVHSA | DVQQWGF TGNLQSNHDLQCQVHGNAHVASCDAIMTRCLAVHECFVKRVDWSVEYPIIGDE  | 6199 |
| TR       | A0A166ZL34   A0A166ZL34_9NIDO | DVQQWGF TGNLQSNHDLQCQVHGNAHVASCDAIMTRCLAVHECFVKRVDWSVEYPIIGDE  | 6006 |
| TR       | R9QTB2   R9QTB2_CVHSA         | -----                                                          |      |
| TR       | R9QTH2   R9QTH2_CVHSA         | -----                                                          |      |
| SP       | P0C6U8   R1A_CVHSA            | -----                                                          |      |
| TR       | Q6JH47   Q6JH47_CVHSA         | -----                                                          |      |
| TR       | Q692E5   Q692E5_CVHSA         | -----                                                          |      |
| SP       | P0C6F8   R1A_BCHK3            | -----                                                          |      |
| TR       | A0A0K1Z0N1   A0A0K1Z0N1_CVHSA | -----                                                          |      |
| SP       | P0C6F5   R1A_BC279            | -----                                                          |      |
| SP       | P0C6T7   R1A_BCRP3            | -----                                                          |      |

|          |                               |                                                                |      |
|----------|-------------------------------|----------------------------------------------------------------|------|
| QHN73794 |                               | LKINAACRKVQHMVVKSAALLADKFPVLHDIGNPKAIKCVPAQADVEWKFYDAQPCSDKAYK | 6287 |
| SP       | P0C6X7   R1AB_CVHSA           | LRVNSACRKVQHMVVKSAALLADKFPVLHDIGNPKAIKCVPAQAEVWKFYDAQPCSDKAYK  | 6264 |
| TR       | Q6UZF5   Q6UZF5_CVHSA         | LRVNSACRKVQHMVVKSAALLADKFPVLHDIGNPKAIKCVPAQAEVWKFYDAQPCSDKAYK  | 6264 |
| TR       | Q6UZF1   Q6UZF1_CVHSA         | LRVNSACRKVQHMVVKSAALLADKFPVLHDIGNPKAIKCVPAQAEVWKFYDAQPCSDKAYK  | 6264 |
| TR       | Q6JH48   Q6JH48_CVHSA         | LRVNSACRKVQHMVVKSAALLADKFPVLHDIGNPKAIKCVPAQAEVWKFYDAQPCSDKAYK  | 6264 |
| TR       | Q692E6   Q692E6_CVHSA         | LRVNSACRKVQHMVVKSAALLADKFPVLHDIGNPKAIKCVPAQAEVWKFYDAQPCSDKAYK  | 6264 |
| TR       | A0A0K1YZY7   A0A0K1YZY7_CVHSA | LKINSACRKVQHMVVKSAALLADKFPVLHDIGNPKAIKCVPAQAEVWKFYDAQPCSDKAYK  | 6264 |
| SP       | P0C6W2   R1AB_BCHK3           | LKINAACRKVQHMVVKSAALLADKFTVLHDIGNPKAIRCVPQAEVDWKFYDAQPCSDKAYK  | 6258 |
| SP       | P0C6W6   R1AB_BCRP3           | LKINSACRKVQHMVVKSAALLADKFPVLHDIGNPKAIKCVPAQAEVWKFYDAQPCSDKAYK  | 6262 |
| SP       | P0C6V9   R1AB_BC279           | LKINAACRKVQHMVVKSAALLADKFSVLHDIGNPKAIKCVPAQAEVDWKFYDAQPCSDKAYK | 6270 |
| TR       | A0A0U1WHI4   A0A0U1WHI4_CVHSA | LKINAACRKVQHMVVKSAALLADKFPVLHDIGNPKAIKCVPAQADVEWKFYDAQPCSDKAYK | 6259 |
| TR       | A0A0U1WHG0   A0A0U1WHG0_CVHSA | LKINAACRKVQHMVVKSAALLADKFPVLHDIGNPKAIKCVPAQADVEWKFYDVQPCSDKAYK | 6259 |
| TR       | A0A166ZL34   A0A166ZL34_9NIDO | LKINAACRKVQHMVVKSAALLADKFPVLHDIGNPKAIKCVPAQADVEWKFYDVQPCSDKAYK | 6066 |
| TR       | R9QTB2   R9QTB2_CVHSA         | -----                                                          |      |
| TR       | R9QTH2   R9QTH2_CVHSA         | -----                                                          |      |
| SP       | P0C6U8   R1A_CVHSA            | -----                                                          |      |
| TR       | Q6JH47   Q6JH47_CVHSA         | -----                                                          |      |
| TR       | Q692E5   Q692E5_CVHSA         | -----                                                          |      |
| SP       | P0C6F8   R1A_BCHK3            | -----                                                          |      |
| TR       | A0A0K1Z0N1   A0A0K1Z0N1_CVHSA | -----                                                          |      |
| SP       | P0C6F5   R1A_BC279            | -----                                                          |      |
| SP       | P0C6T7   R1A_BCRP3            | -----                                                          |      |

|          |                               |                                                                |      |
|----------|-------------------------------|----------------------------------------------------------------|------|
| QHN73794 |                               | IEELFYSYATHSDKFTDGVCLFWNCNVD RYPANAIVCRFDTRVLSNLNLP GCDGGSLYVN | 6347 |
| SP       | P0C6X7   R1AB_CVHSA           | IEELFYSYATHHDKFTDGVCLFWNCNVD RYPANAIVCRFDTRVLSNLNLP GCDGGSLYVN | 6324 |
| TR       | Q6UZF5   Q6UZF5_CVHSA         | IEELFYSYATHHDKFTDGVCLFWNCNVD RYPANAIVCRFDTRVLSNLNLP GCDGGSLYVN | 6324 |
| TR       | Q6UZF1   Q6UZF1_CVHSA         | IEELFYSYATHHDKFTDGVCLFWNCNVD RYPANAIVCRFDTRVLSNLNLP GCDGGSLYVN | 6324 |
| TR       | Q6JH48   Q6JH48_CVHSA         | IEELFYSYATHHDKFTDGVCLFWNCNVD RYPANAIVCRFDTRVLSNLNLP GCDGGSLYVN | 6324 |
| TR       | Q692E6   Q692E6_CVHSA         | IEELFYSYATHHDKFTDGVCLFWNCNVD RYPANAIVCRFDTRVLSNLNLP GCDGGSLYVN | 6324 |
| TR       | A0A0K1YZY7   A0A0K1YZY7_CVHSA | IEELFYSYATHHDKFTDGVCLFWNCNVD RYPANAIVCRFDTRVLSNLNLP GCDGGSLYVN | 6324 |
| SP       | P0C6W2   R1AB_BCHK3           | IEELFYSYATHHDKFTDGVCLFWNCNVD RYPANAIVCRFDTRVLSNLNLP GCDGGSLYVN | 6318 |
| SP       | P0C6W6   R1AB_BCRP3           | IEELFYSYATHHDKFTDGVCLFWNCNVD RYPANAIVCRFDTRVLSNLNLP GCDGGSLYVN | 6322 |
| SP       | P0C6V9   R1AB_BC279           | IEELFYSYATHHDKFTDGVCLFWNCNVD RYPANAIVCRFDTRVLSNLNLP GCDGGSLYVN | 6330 |
| TR       | A0A0U1WHI4   A0A0U1WHI4_CVHSA | IEELFYSYATHHDKFTDGVCLFWNCNVD RYPANAIVCRFDTRVLSNLNLP GCDGGSLYVN | 6319 |
| TR       | A0A0U1WHG0   A0A0U1WHG0_CVHSA | IEELFYSYATHHDKFTDGVCLFWNCNVD RYPANAIVCRFDTRVLSNLNLP GCDGGSLYVN | 6319 |
| TR       | A0A166ZL34   A0A166ZL34_9NIDO | IEELFYSYATHHDKFTDGVCLFWNCNVD RYPANAIVCRFDTRVLSNLNLP GCDGGSLYVN | 6126 |
| TR       | R9QTB2   R9QTB2_CVHSA         | -----                                                          |      |
| TR       | R9QTH2   R9QTH2_CVHSA         | -----                                                          |      |
| SP       | P0C6U8   R1A_CVHSA            | -----                                                          |      |
| TR       | Q6JH47   Q6JH47_CVHSA         | -----                                                          |      |
| TR       | Q692E5   Q692E5_CVHSA         | -----                                                          |      |
| SP       | P0C6F8   R1A_BCHK3            | -----                                                          |      |
| TR       | A0A0K1Z0N1   A0A0K1Z0N1_CVHSA | -----                                                          |      |
| SP       | P0C6F5   R1A_BC279            | -----                                                          |      |
| SP       | P0C6T7   R1A_BCRP3            | -----                                                          |      |

|          |                             |                                                                |      |
|----------|-----------------------------|----------------------------------------------------------------|------|
| QHN73794 |                             | KHAFHTPAFDKSAFVNLKQLPFFYYSDSPCESHGKQVVSDIDYVPLKSATCITRCNLGGA   | 6407 |
| SP       | P0C6X7 R1AB_CVHSA           | KHAFHTPAFDKSAFTNLKQLPFFYYSDSPCESHGKQVVSDIDYVPLKSATCITRCNLGGA   | 6384 |
| TR       | Q6UZF5 Q6UZF5_CVHSA         | KHAFHTPAFDKSAFTNLKQLPFFYYSDSPCESHGKQVVSDIDYVPLKSATCITRCNLGGA   | 6384 |
| TR       | Q6UZF1 Q6UZF1_CVHSA         | KHAFHTPAFDKSAFTNLKQLPFFYYSDSPCESHGKQVVSDIDYVPLKSATCITRCNLGGA   | 6384 |
| TR       | Q6JH48 Q6JH48_CVHSA         | KHAFHTPAFDKSAFTNLKQLPFFYYSDSPCESHGKQVVSDIDYVPLKSATCITRCNLGGA   | 6384 |
| TR       | Q692E6 Q692E6_CVHSA         | KHAFHTPAFDKSAFTNLKQLPFFYYSDSPCESHGKQVVSDIDYVPLKSATCITRCNLGGA   | 6384 |
| TR       | A0A0K1YZY7 A0A0K1YZY7_CVHSA | KHAFHTPAFDKSAFTNLKQLPFFYYSDSPCESHGKQVVSDIDYVPLKSATCITRCNLGGA   | 6384 |
| SP       | P0C6W2 R1AB_BCHK3           | KHAFHTPAFDKSAFTNLKQLPFFYYSDSPCESHGKQVVSDIDYVPLKSATCITRCNLGGA   | 6378 |
| SP       | P0C6W6 R1AB_BCRP3           | KHAFHTPAFDKSAFTNLKQLPFFYYSDSPCESHGKQVVSDIDYVPLKSATCITRCNLGGA   | 6382 |
| SP       | P0C6V9 R1AB_BC279           | KHAFHTPAFDKSAFTYLKQLPFFYYSDSPCESHGKQVVSDIDYVPLKSATCITRCNLGGA   | 6390 |
| TR       | A0A0U1WHI4 A0A0U1WHI4_CVHSA | KHAFHTPAFDKSAFSLNKLKQLPFFYYSDSPCESHGKQVVSDIDYVPLKSATCITRCNLGGA | 6379 |
| TR       | A0A0U1WHG0 A0A0U1WHG0_CVHSA | KHAFHTPAFDKSAFTNLKQLPFFYYSDSPCESHGKQVVSDIDYVPLKSATCITRCNLGGA   | 6379 |
| TR       | A0A166ZL34 A0A166ZL34_9NIDO | KHAFYTPAFDKSAFTHLKQLPFFYYSDSPCESHGKQVVSDIDYVPLKSATCITRCNLGGA   | 6186 |
| TR       | R9QTB2 R9QTB2_CVHSA         | -----                                                          |      |
| TR       | R9QTH2 R9QTH2_CVHSA         | -----                                                          |      |
| SP       | P0C6U8 R1A_CVHSA            | -----                                                          |      |
| TR       | Q6JH47 Q6JH47_CVHSA         | -----                                                          |      |
| TR       | Q692E5 Q692E5_CVHSA         | -----                                                          |      |
| SP       | P0C6F8 R1A_BCHK3            | -----                                                          |      |
| TR       | A0A0K1Z0N1 A0A0K1Z0N1_CVHSA | -----                                                          |      |
| SP       | P0C6F5 R1A_BC279            | -----                                                          |      |
| SP       | P0C6T7 R1A_BCRP3            | -----                                                          |      |

|          |                             |                                                              |      |
|----------|-----------------------------|--------------------------------------------------------------|------|
| QHN73794 |                             | VCRHHANEYRLYLDAYNMMISAGFSLWVYKQFDTYNLWNTFTRLQSLENVAFNVVNKGHF | 6467 |
| SP       | P0C6X7 R1AB_CVHSA           | VCRHHANEYRQYLDAYNMMISAGFSLWIYKQFDTYNLWNTFTRLQSLENVAYNVVNKGHF | 6444 |
| TR       | Q6UZF5 Q6UZF5_CVHSA         | VCRHHANEYRQYLDAYNMMISAGFSLWIYKQFDTYNLWNTFTRLQSLENVAYNVVNKGHF | 6444 |
| TR       | Q6UZF1 Q6UZF1_CVHSA         | VCRHHANEYRQYLDAYNMMISAGFSLWIYKQFDTYNLWNTFTRLQSLENVAYNVVNKGHF | 6444 |
| TR       | Q6JH48 Q6JH48_CVHSA         | VCRHHANEYRQYLDAYNMMISAGFSLWIYKQFDTYNLWNTFTRLQSLENVAYNVVNKGHF | 6444 |
| TR       | Q692E6 Q692E6_CVHSA         | VCRHHANEYRQYLDAYNMMISAGFSLWIYKQFDTYNLWNTFTRLQSLENVAYNVVNKGHF | 6444 |
| TR       | A0A0K1YZY7 A0A0K1YZY7_CVHSA | VCRHHANEYRQYLDAYNMMISAGFSLWIYKQFDTYNLWNTFTRLQSLENVAYNVVNKGHF | 6444 |
| SP       | P0C6W2 R1AB_BCHK3           | VCRHHANEYRQYLDAYNMMISAGFSLWIYKQFDTYNLWNTFTRLQSLENVAYNVVNKGHF | 6438 |
| SP       | P0C6W6 R1AB_BCRP3           | VCRHHANEYRQYLDAYNMMISAGFSLWIYKQFDTYNLWNTFTRLQSLENVAYNVVNKGHF | 6442 |
| SP       | P0C6V9 R1AB_BC279           | VCRHHANEYRQYLDAYNMMISAGFSLWIYKQFDTYNLWNTFTRLQSLENVAYNVVNKGHF | 6450 |
| TR       | A0A0U1WHI4 A0A0U1WHI4_CVHSA | VCRHHANEYRQYLDAYNMMISAGFSLWIYKQFDTYNLWNTFTRLQSLENVAYNVVNKGHF | 6439 |
| TR       | A0A0U1WHG0 A0A0U1WHG0_CVHSA | VCRHHANEYRQYLDAYNMMISAGFSLWIYKQFDTYNLWNTFTRLQSLENVAYNVVNKGHF | 6439 |
| TR       | A0A166ZL34 A0A166ZL34_9NIDO | VCRHHANEYRQYLDAYNMMISAGFSLWIYKQFDTYNLWNTFTRLQSLENVAYNVVNKGHF | 6246 |
| TR       | R9QTB2 R9QTB2_CVHSA         | -----                                                        |      |
| TR       | R9QTH2 R9QTH2_CVHSA         | -----                                                        |      |
| SP       | P0C6U8 R1A_CVHSA            | -----                                                        |      |
| TR       | Q6JH47 Q6JH47_CVHSA         | -----                                                        |      |
| TR       | Q692E5 Q692E5_CVHSA         | -----                                                        |      |
| SP       | P0C6F8 R1A_BCHK3            | -----                                                        |      |
| TR       | A0A0K1Z0N1 A0A0K1Z0N1_CVHSA | -----                                                        |      |
| SP       | P0C6F5 R1A_BC279            | -----                                                        |      |
| SP       | P0C6T7 R1A_BCRP3            | -----                                                        |      |

|          |                             |                                                              |      |
|----------|-----------------------------|--------------------------------------------------------------|------|
| QHN73794 |                             | DGQQGEVPVSIINNTVYTKVDGVDVDFENKTTLPVNVAFELWAKRNIKPVEIKILNNL   | 6527 |
| SP       | P0C6X7 R1AB_CVHSA           | DGHAGEAPVSIINNAVYTKVDGIDVEIFENKTTLPVNVAFELWAKRNIKPVEIKILNNL  | 6504 |
| TR       | Q6UZF5 Q6UZF5_CVHSA         | DGHAGEAPVSIINNAVYTKVDGIDVEIFENKTTLPVNVAFELWAKRNIKPVEIKILNNL  | 6504 |
| TR       | Q6UZF1 Q6UZF1_CVHSA         | DGHAGEAPVSIINNAVYTKVDGIDVEIFENKTTLPVNVAFELWAKRNIKPVEIKILNNL  | 6504 |
| TR       | Q6JH48 Q6JH48_CVHSA         | DGHAGEAPVSIINNAVYTKVDGIDVEIFENKTTLPVNVAFELWAKRNIKPVEIKILNNL  | 6504 |
| TR       | Q692E6 Q692E6_CVHSA         | DGHAGEAPVSIINNAVYTKVDGIDVEIFENKTTLPVNVAFELWAKRNIKPVEIKILNNL  | 6504 |
| TR       | A0A0K1YZY7 A0A0K1YZY7_CVHSA | DGHAGEAPVSIINNAVYTKVDGIDVEIFENKTTLPVNVAFELWAKRNIKPVEIKILNNL  | 6504 |
| SP       | P0C6W2 R1AB_BCHK3           | DGQSAGEAPVSIINNAVYTKVDGIDVEIFENKTTLPVNVAFELWAKRNIKPVEIKILNNL | 6498 |
| SP       | P0C6W6 R1AB_BCRP3           | DGQAGEPVSIIINNAVYTKVDGIDVEIFENKTTLPVNVAFELWAKRNIKSVEIKILNNL  | 6502 |
| SP       | P0C6V9 R1AB_BC279           | DGQIGEPVSIINNAVYTKVDGNDVEIFENKTTLPVNVAFELWAKRNIKPVEIKILNNL   | 6510 |
| TR       | A0A0U1WHI4 A0A0U1WHI4_CVHSA | DGQIGEPVSIINNAVYTKVDGIDVEIFENKTTLPVNVAFELWAKRNIKPVEIKILNNL   | 6499 |
| TR       | A0A0U1WHG0 A0A0U1WHG0_CVHSA | DGQIGEPVSIINNAVYTKVDGIDVEIFENKTTLPVNVAFELWAKRNIKPVEIKILNNL   | 6499 |
| TR       | A0A166ZL34 A0A166ZL34_9NIDO | DGQIGEPVSIINNAVYTKVDGIDVEIFENKTTLPVNVAFELWAKRNIKPVEIKILNNL   | 6306 |
| TR       | R9QTB2 R9QTB2_CVHSA         | -----                                                        |      |
| TR       | R9QTH2 R9QTH2_CVHSA         | -----                                                        |      |
| SP       | P0C6U8 R1A_CVHSA            | -----                                                        |      |
| TR       | Q6JH47 Q6JH47_CVHSA         | -----                                                        |      |
| TR       | Q692E5 Q692E5_CVHSA         | -----                                                        |      |
| SP       | P0C6F8 R1A_BCHK3            | -----                                                        |      |
| TR       | A0A0K1Z0N1 A0A0K1Z0N1_CVHSA | -----                                                        |      |
| SP       | P0C6F5 R1A_BC279            | -----                                                        |      |
| SP       | P0C6T7 R1A_BCRP3            | -----                                                        |      |

|          |                             |                                                              |      |
|----------|-----------------------------|--------------------------------------------------------------|------|
| QHN73794 |                             | GVDIAANTVIWDYKRDAPAHISTIGVCSMTDIAKKPTETICAPLTVFFDGRVDGQVDLFR | 6587 |
| SP       | P0C6X7 R1AB_CVHSA           | GVDIAANTVIWDYKREAPAHVSTIGVCTMTDIAKKPTESACSSLTVLFDGRVEGQVDLFR | 6564 |
| TR       | Q6UZF5 Q6UZF5_CVHSA         | GVDIAANTVIWDYKREAPAHVSTIGVCTMTDIAKKPTESACSSLTVLFDGRVEGQVDLFR | 6564 |
| TR       | Q6UZF1 Q6UZF1_CVHSA         | GVDIAANTVIWDYKREAPAHVSTIGVCTMTDIAKKPTESACSSLTVLFDGRVEGQVDLFR | 6564 |
| TR       | Q6JH48 Q6JH48_CVHSA         | GVDIAANTVIWDYKREAPAHVSTIGVCTMTDIAKKPTESACSSLTVLFDGRVEGQVDLFR | 6564 |
| TR       | Q692E6 Q692E6_CVHSA         | GVDIAANTVIWDYKREAPAHVSTIGVCTMTDIAKKPTESACSSLTVLFDGRVEGQVDLFR | 6564 |
| TR       | A0A0K1YZY7 A0A0K1YZY7_CVHSA | GVDIAANTVIWDYKREAPAHVSTIGVCTMTDIAKKPTESACSSLTVLFDGRVEGQVDLFR | 6564 |
| SP       | P0C6W2 R1AB_BCHK3           | GVDIAANNVIWDYKREAPAHVSTIGVCTMTDIAKKPTESACSSLTVLFDGRVEGQVDLFR | 6558 |
| SP       | P0C6W6 R1AB_BCRP3           | GVDIAANTVIWDYKREAPAHVSTIGVCTMTDIAKKPTESACSSLTVLFDGRVEGQVDLFR | 6562 |
| SP       | P0C6V9 R1AB_BC279           | GVDIAANTVIWDYKREAPAHVSTIGVCTMTDIAKKPTESACSSLTVLFDGRVEGQVDLFR | 6570 |
| TR       | A0A0U1WHI4 A0A0U1WHI4_CVHSA | GVDIAANTVIWDYKREAPAHVSTIGICTMTDIAKKPTESACSSLTVLFDGRVEGQVDLFR | 6559 |
| TR       | A0A0U1WHG0 A0A0U1WHG0_CVHSA | GVDIAANTVIWDYKREAPAHVSTIGICTMTDIAKKPTESACSSLTVLFDGRVEGQVDLFR | 6559 |
| TR       | A0A166ZL34 A0A166ZL34_9NIDO | GVDIAANTVIWDYKREAPAHVSTIGICTMTDIAKKPTESACSSLTVLFDGRVEGQVDLFR | 6366 |
| TR       | R9QTB2 R9QTB2_CVHSA         | -----                                                        |      |
| TR       | R9QTH2 R9QTH2_CVHSA         | -----                                                        |      |
| SP       | P0C6U8 R1A_CVHSA            | -----                                                        |      |
| TR       | Q6JH47 Q6JH47_CVHSA         | -----                                                        |      |
| TR       | Q692E5 Q692E5_CVHSA         | -----                                                        |      |
| SP       | P0C6F8 R1A_BCHK3            | -----                                                        |      |
| TR       | A0A0K1Z0N1 A0A0K1Z0N1_CVHSA | -----                                                        |      |
| SP       | P0C6F5 R1A_BC279            | -----                                                        |      |
| SP       | P0C6T7 R1A_BCRP3            | -----                                                        |      |

|          |                             |                                                               |      |
|----------|-----------------------------|---------------------------------------------------------------|------|
| QHN73794 |                             | NARNGVLITEGSVKGLQPSVGPKQASLNGVTLIGEAVKTFQFNYYKKVDGVVQQLPETYFT | 6647 |
| SP       | P0C6X7 R1AB_CVHSA           | NARNGVLITEGSVKGLTPSKGPAQASVNGVTLIGESVKTQFNYYKKVDGIIQQLPETYFT  | 6624 |
| TR       | Q6UZF5 Q6UZF5_CVHSA         | NARNGVLITEGSVKGLTPSKGPAQASVNGVTLIGESVKTQFNYYKKVDGIIQQLPETYFT  | 6624 |
| TR       | Q6UZF1 Q6UZF1_CVHSA         | NARNGVLITEGSVKGLTPSKGPAQASVNGVTLIGESVKTQFNYYKKVDGIIQQLPETYFT  | 6624 |
| TR       | Q6JH48 Q6JH48_CVHSA         | NARNGVLITEGSVKGLTPSKGPAQASVNGVTLIGESVKTQFNYYKKVDGIIQQLPETYFT  | 6624 |
| TR       | Q692E6 Q692E6_CVHSA         | NARNGVLITEGSVKGLTPSKGPAQASVNGVTLIGESVKTQFNYYKKVDGIIQQLPETYFT  | 6624 |
| TR       | A0A0K1YZY7 A0A0K1YZY7_CVHSA | NARNGVLITEGSVKGLTPSKGPAQASVNGVTLIGESVKTQFNYYKKVDGIIQQLPETYFT  | 6624 |
| SP       | P0C6W2 R1AB_BCHK3           | NARNGVLITEGSVKGLTPSKGPAQASVNGVTLIGESVKTQFNYYKKVDGIIQQLPETYFT  | 6618 |
| SP       | P0C6W6 R1AB_BCRP3           | NARNGVLITEGSVKGLTPSKGPAQASVNGVTLIGESVKTQFNYYKKVDGIIQQLPETYFT  | 6622 |
| SP       | P0C6V9 R1AB_BC279           | NARNGVLITEGSVKGLTPSKGPAQASVNGVTLIGESVKTQFNYYKKVDGIIQQLPETYFT  | 6630 |
| TR       | A0A0U1WHI4 A0A0U1WHI4_CVHSA | NARNGVLITEGSVKGLTPSKGPAQASVNGVTLIGESVKTQFNYYKKVDGIIQQLPETYFT  | 6619 |
| TR       | A0A0U1WHG0 A0A0U1WHG0_CVHSA | NARNGVLITEGSVKGLTPSKGPAQASVNGVTLIGESVKTQFNYYKKVDGIIQQLPETYFT  | 6619 |
| TR       | A0A166ZL34 A0A166ZL34_9NIDO | NARNGVLITEGSVKGLTPSKGPAQASVNGVTLIGESVKTQFNYYKKVDGIIQQLPETYFT  | 6426 |
| TR       | R9QTB2 R9QTB2_CVHSA         | -----                                                         |      |
| TR       | R9QTH2 R9QTH2_CVHSA         | -----                                                         |      |
| SP       | P0C6U8 R1A_CVHSA            | -----                                                         |      |
| TR       | Q6JH47 Q6JH47_CVHSA         | -----                                                         |      |
| TR       | Q692E5 Q692E5_CVHSA         | -----                                                         |      |
| SP       | P0C6F8 R1A_BCHK3            | -----                                                         |      |
| TR       | A0A0K1Z0N1 A0A0K1Z0N1_CVHSA | -----                                                         |      |
| SP       | P0C6F5 R1A_BC279            | -----                                                         |      |
| SP       | P0C6T7 R1A_BCRP3            | -----                                                         |      |

|          |                             |                                                              |      |
|----------|-----------------------------|--------------------------------------------------------------|------|
| QHN73794 |                             | QSRNLEQEFKPRSQMEIDFLELAMDEFIERYKLEGYAFEHIVYGDFSQGLGGLHLLIGLA | 6707 |
| SP       | P0C6X7 R1AB_CVHSA           | QSRDLEDFKPRSQMETDFLELAMDEFIORYKLEGYAFEHIVYGDFSQGLGGLHLMIGLA  | 6684 |
| TR       | Q6UZF5 Q6UZF5_CVHSA         | QSRDLEDFKPRSQMETDFLELAMDEFIORYKLEGYAFEHIVYGDFSQGLGGLHLMIGLA  | 6684 |
| TR       | Q6UZF1 Q6UZF1_CVHSA         | QSRDLEDFKPRSQMETDFLELAMDEFIORYKLEGYAFEHIVYGDFSQGLGGLHLMIGLA  | 6684 |
| TR       | Q6JH48 Q6JH48_CVHSA         | QSRDLEDFKPRSQMETDFLELAMDEFIORYKLEGYAFEHIVYGDFSQGLGGLHLMIGLA  | 6684 |
| TR       | Q692E6 Q692E6_CVHSA         | QSRDLEDFKPRSQMETDFLELAMDEFIORYKLEGYAFEHIVYGDFSQGLGGLHLMIGLA  | 6684 |
| TR       | A0A0K1YZY7 A0A0K1YZY7_CVHSA | QSRDLEDFKPRSQMETDFLELAMDEFIORYKLEGYAFEHIVYGDFSQGLGGLHLMIGLA  | 6684 |
| SP       | P0C6W2 R1AB_BCHK3           | QSRDLEDFKPRSQMETDFLELAMDEFIORYKLEGYAFEHIVYGDFSQGLGGLHLMIGLA  | 6678 |
| SP       | P0C6W6 R1AB_BCRP3           | QSRDLEDFKPRSQMETDFLELAMDEFIORYKLEGYAFEHIVYGDFSQGLGGLHLMIGLA  | 6682 |
| SP       | P0C6V9 R1AB_BC279           | QSRDLEDFKPRSQMETDFLELAMDEFIORYKLEGYAFEHIVYGDFSQGLGGLHLMIGLA  | 6690 |
| TR       | A0A0U1WHI4 A0A0U1WHI4_CVHSA | QSRDLEDFKPRSQMETDFLELAMDEFIORYKLEGYAFEHIVYGDFSQGLGGLHLMIGLA  | 6679 |
| TR       | A0A0U1WHG0 A0A0U1WHG0_CVHSA | QSRDLEDFKPRSQMETDFLELAMDEFIORYKLEGYAFEHIVYGDFSQGLGGLHLMIGLA  | 6679 |
| TR       | A0A166ZL34 A0A166ZL34_9NIDO | QSRDLEDFKPRSQMETDFLELAMDEFIORYKLEGYAFEHIVYGDFSQGLGGLHLMIGLA  | 6486 |
| TR       | R9QTB2 R9QTB2_CVHSA         | -----                                                        |      |
| TR       | R9QTH2 R9QTH2_CVHSA         | -----                                                        |      |
| SP       | P0C6U8 R1A_CVHSA            | -----                                                        |      |
| TR       | Q6JH47 Q6JH47_CVHSA         | -----                                                        |      |
| TR       | Q692E5 Q692E5_CVHSA         | -----                                                        |      |
| SP       | P0C6F8 R1A_BCHK3            | -----                                                        |      |
| TR       | A0A0K1Z0N1 A0A0K1Z0N1_CVHSA | -----                                                        |      |
| SP       | P0C6F5 R1A_BC279            | -----                                                        |      |
| SP       | P0C6T7 R1A_BCRP3            | -----                                                        |      |



|          |                               |                                                              |      |
|----------|-------------------------------|--------------------------------------------------------------|------|
| QHN73794 |                               | KRFKESPFLEDFIPMDSTVKNYFITDAQTGSSKCVCSVIDLLDDFVEI IKSQDLSVVS  | 6767 |
| SP       | P0C6X7   R1AB_CVHSA           | KRSQDSPLKLEDFIPMDSTVKNYFITDAQTGSSKCVCSVIDLLDDFVEI IKSQDLSVIS | 6744 |
| TR       | Q6UZF5   Q6UZF5_CVHSA         | KRSQDSPLKLEDFIPMDSTVKNYFITDAQTGSSKCVCSVIDLLDDFVEI IKSQDLSVIS | 6744 |
| TR       | Q6UZF1   Q6UZF1_CVHSA         | KRSQDSPLKLEDFIPMDSTVKNYFITDAQTGSSKCVCSVIDLLDDFVEI IKSQDLSVIS | 6744 |
| TR       | Q6JH48   Q6JH48_CVHSA         | KRSQDSPLKLEDFIPMDSTVKNYFITDAQTGSSKCVCSVIDLLDDFVEI IKSQDLSVIS | 6744 |
| TR       | Q692E6   Q692E6_CVHSA         | KRSQDSPLKLEDFIPMDSTVKNYFITDAQTGSSKCVCSVIDLLDDFVEI IKSQDLSVIS | 6744 |
| TR       | A0A0K1YZY7   A0A0K1YZY7_CVHSA | KRSQDSPLKLEDFIPMDSTVKNYFITDAQTGSSKCVCSVIDLLDDFVEI IKSQDLSVIS | 6744 |
| SP       | P0C6W2   R1AB_BCHK3           | KRSQDSLLKLEDFIPMDSTVKNYFITDAQTGSSKCVCSVIDLLDDFVEI IKSQDLSVVS | 6738 |
| SP       | P0C6W6   R1AB_BCRP3           | KRSRDSPLKLEDFIPMDSTVKNYFITDAQTGSSKCVCSVIDLLDDFVEI IKSQDLSVVS | 6742 |
| SP       | P0C6V9   R1AB_BC279           | KRSQDSPLKLEDFIPTDSTVKNYFITDAQTGSSKCVCSVIDLLDDFVEI IKSQDLSVIS | 6750 |
| TR       | A0A0U1WHI4   A0A0U1WHI4_CVHSA | KRSQDSPLKLEDFIPMDSTVKNYFITDAQTGSSKCVCSVIDLLDDFVEI IKSQDLSVVS | 6739 |
| TR       | A0A0U1WHG0   A0A0U1WHG0_CVHSA | KRSQDSPLKLEDFIPMDSTVKNYFITDAKTGSSKCVCSVIDLLDDFVEI IKSQDLSVIS | 6739 |
| TR       | A0A166ZL34   A0A166ZL34_9NIDO | KRSQDSPLKLEDFIPMDSTVKNYFITDAQTGSSKCVCSVIDLLDDFVEI IKSQDLSVIS | 6546 |
| TR       | R9QTB2   R9QTB2_CVHSA         | -----                                                        |      |
| TR       | R9QTH2   R9QTH2_CVHSA         | -----                                                        |      |
| SP       | P0C6U8   R1A_CVHSA            | -----                                                        |      |
| TR       | Q6JH47   Q6JH47_CVHSA         | -----                                                        |      |
| TR       | Q692E5   Q692E5_CVHSA         | -----                                                        |      |
| SP       | P0C6F8   R1A_BCHK3            | -----                                                        |      |
| TR       | A0A0K1Z0N1   A0A0K1Z0N1_CVHSA | -----                                                        |      |
| SP       | P0C6F5   R1A_BC279            | -----                                                        |      |
| SP       | P0C6T7   R1A_BCRP3            | -----                                                        |      |

|          |                               |                                                              |      |
|----------|-------------------------------|--------------------------------------------------------------|------|
| QHN73794 |                               | KVVKVTIDYTEISFMLWCKDGHVETFYPKLQSSQAWQPGVAMPNLYKMQRMLLEKCDLQN | 6827 |
| SP       | P0C6X7   R1AB_CVHSA           | KVVKVTIDYAEISFMLWCKDGHVETFYPKLQASQAWQPGVAMPNLYKMQRMLLEKCDLQN | 6804 |
| TR       | Q6UZF5   Q6UZF5_CVHSA         | KVVKVTIDYAEISFMLWCKDGHVETFYPKLQASQAWQPGVAMPNLYKMQRMLLEKCDLQN | 6804 |
| TR       | Q6UZF1   Q6UZF1_CVHSA         | KVVKVTIDYAEISFMLWCKDGHVETFYPKLQASQAWQPGVAMPNLYKMQRMLLEKCDLQN | 6804 |
| TR       | Q6JH48   Q6JH48_CVHSA         | KVVKVTIDYAEISFMLWCKDGHVETFYPKLQASQAWQPGVAMPNLYKMQRMLLEKCDLQN | 6804 |
| TR       | Q692E6   Q692E6_CVHSA         | KVVKVTIDYAEISFMLWCKDGHVETFYPKLQASQAWQPGVAMPNLYKMQRMLLEKCDLQN | 6804 |
| TR       | A0A0K1YZY7   A0A0K1YZY7_CVHSA | KVVKVTIDYVEISFMLWCKDGHVETFYPKLQASQAWQPGVAMPNLYKMQRMLLEKCDLQN | 6804 |
| SP       | P0C6W2   R1AB_BCHK3           | KVVKVTIDYAEISFMLWCKDGHVETFYPKLQASQAWQPGVAMPNLYKMQRMLLEKCDLQN | 6798 |
| SP       | P0C6W6   R1AB_BCRP3           | KVVKVTIDYAEISFMLWCKDGHVETFYPKLQASQAWQPGVAMPNLYKMQRMLLEKCDLQN | 6802 |
| SP       | P0C6V9   R1AB_BC279           | KVVKVTIDYAEISFMLWCKDGHVETFYPKLQASQAWQPGVAMPNLYKMQRMLLEKCDLQN | 6810 |
| TR       | A0A0U1WHI4   A0A0U1WHI4_CVHSA | KVVKVTIDYAEISFMLWCKDGHVETFYPKLQASQAWQPGVAMPNLYKMQRMLLEKCDLQN | 6799 |
| TR       | A0A0U1WHG0   A0A0U1WHG0_CVHSA | KVVKVTIDYAEISFMLWCKDGYVETFYPKLQASQAWQPGVAMPNLYKMQRMLLEKCDLQN | 6799 |
| TR       | A0A166ZL34   A0A166ZL34_9NIDO | KVVKVTIDYAEISFMLWCKDGYVETFYPKLQASQAWQPGVAMPNLYKMQRMLLEKCDLQN | 6606 |
| TR       | R9QTB2   R9QTB2_CVHSA         | -----                                                        |      |
| TR       | R9QTH2   R9QTH2_CVHSA         | -----                                                        |      |
| SP       | P0C6U8   R1A_CVHSA            | -----                                                        |      |
| TR       | Q6JH47   Q6JH47_CVHSA         | -----                                                        |      |
| TR       | Q692E5   Q692E5_CVHSA         | -----                                                        |      |
| SP       | P0C6F8   R1A_BCHK3            | -----                                                        |      |
| TR       | A0A0K1Z0N1   A0A0K1Z0N1_CVHSA | -----                                                        |      |
| SP       | P0C6F5   R1A_BC279            | -----                                                        |      |
| SP       | P0C6T7   R1A_BCRP3            | -----                                                        |      |

|          |                               |                                                              |      |
|----------|-------------------------------|--------------------------------------------------------------|------|
| QHN73794 |                               | YGDSATLPKGIMMNVAKYTQLCQYLNLTTLAVPYNMRVIHFGAGSDKGVPAGTAVLRQWL | 6887 |
| SP       | P0C6X7   R1AB_CVHSA           | YGENAVIPKGIMMNVAKYTQLCQYLNLTTLAVPYNMRVIHFGAGSDKGVPAGTAVLRQWL | 6864 |
| TR       | Q6UZF5   Q6UZF5_CVHSA         | YGENAVIPKGIMMNVAKYTQLCQYLNLTTLAVPYNMRVIHFGAGSDKGVPAGTAVLRQWL | 6864 |
| TR       | Q6UZF1   Q6UZF1_CVHSA         | YGENAVIPKGIMMNVAKYTQLCQYLNLTTLAVPYNMRVIHFGAGSDKGVPAGTAVLRQWL | 6864 |
| TR       | Q6JH48   Q6JH48_CVHSA         | YGENAVIPKGIMMNVAKYTQLCQYLNLTTLAVPYNMRVIHFGAGSDKGVPAGTAVLRQWL | 6864 |
| TR       | Q692E6   Q692E6_CVHSA         | YGENAVIPKGIMMNVAKYTQLCQYLNLTTLAVPYNMRVIHFGAGSDKGVPAGTAVLRQWL | 6864 |
| TR       | A0A0K1YZY7   A0A0K1YZY7_CVHSA | YGENAVIPKGIMMNVAKYTQLCQYLNLTTLAVPYNMRVIHFGAGSDKGVPAGTAVLRQWL | 6864 |
| SP       | P0C6W2   R1AB_BCHK3           | YGENAVIPKGIMMNVAKYTQLCQYLNLTTLAVPYNMRVIHFGAGSDKGVPAGTAVLRQWL | 6858 |
| SP       | P0C6W6   R1AB_BCRP3           | YGENAVIPKGIMMNVAKYTQLCQYLNLTTLAVPYNMRVIHFGAGSDKGVPAGTAVLRQWL | 6862 |
| SP       | P0C6V9   R1AB_BC279           | YGENAVIPKGIMMNVAKYTQLCQYLNLTTLAVPYNMRVIHFGAGSDKGVPAGTAVLRQWL | 6870 |
| TR       | A0A0U1WHI4   A0A0U1WHI4_CVHSA | YGENAVIPKGIMMNVAKYTQLCQYLNLTTLAVPYNMRVIHFGAGSDKGVPAGTAVLRQWL | 6859 |
| TR       | A0A0U1WHG0   A0A0U1WHG0_CVHSA | YGENAVIPKGIMMNVAKYTQLCQYLNLTTLAVPYNMRVIHFGAGSDKGVPAGTAVLRQWL | 6859 |
| TR       | A0A166ZL34   A0A166ZL34_9NIDO | YGENAVIPKGIMMNVAKYTQLCQYLNLTTLAVPYNMRVIHFGAGSDKGVPAGTAVLRQWL | 6666 |
| TR       | R9QTB2   R9QTB2_CVHSA         | -----                                                        |      |
| TR       | R9QTH2   R9QTH2_CVHSA         | -----                                                        |      |
| SP       | P0C6U8   R1A_CVHSA            | -----                                                        |      |
| TR       | Q6JH47   Q6JH47_CVHSA         | -----                                                        |      |
| TR       | Q692E5   Q692E5_CVHSA         | -----                                                        |      |
| SP       | P0C6F8   R1A_BCHK3            | -----                                                        |      |
| TR       | A0A0K1Z0N1   A0A0K1Z0N1_CVHSA | -----                                                        |      |
| SP       | P0C6F5   R1A_BC279            | -----                                                        |      |
| SP       | P0C6T7   R1A_BCRP3            | -----                                                        |      |

QHN73794  
SP P0C6X7 | R1AB\_CVHSA  
TR Q6UZF5 | Q6UZF5\_CVHSA  
TR Q6UZF1 | Q6UZF1\_CVHSA  
TR Q6JH48 | Q6JH48\_CVHSA  
TR Q692E6 | Q692E6\_CVHSA  
TR A0A0K1YZY7 | A0A0K1YZY7\_CVHSA  
SP P0C6W2 | R1AB\_BCHK3  
SP P0C6W6 | R1AB\_BCRP3  
SP P0C6V9 | R1AB\_BC279  
TR A0A0U1WHI4 | A0A0U1WHI4\_CVHSA  
TR A0A0U1WHG0 | A0A0U1WHG0\_CVHSA  
TR A0A166ZL34 | A0A166ZL34\_9NIDO  
TR R9QTB2 | R9QTB2\_CVHSA  
TR R9QTH2 | R9QTH2\_CVHSA  
SP P0C6U8 | R1A\_CVHSA  
TR Q6JH47 | Q6JH47\_CVHSA  
TR Q692E5 | Q692E5\_CVHSA  
SP P0C6F8 | R1A\_BCHK3  
TR A0A0K1Z0N1 | A0A0K1Z0N1\_CVHSA  
SP P0C6F5 | R1A\_BC279  
SP P0C6T7 | R1A\_BCRP3

PTGTLLVDSDLNDFVSDADSTLIGDCATVHTANKWDLIISDMYDPKTKHVTKENDSKEGF 6947  
PTGTLLVDSDLNDFVSDADSTLIGDCATVHTANKWDLIISDMYDPRTKHKVTKENDSKEGF 6924  
PTGTLLVDSDLNDFVSDADSTLIGDCATVHTANKWDLIISDMYDPRTKHKVTKENDSKEGF 6924  
PTGTLLVDSDLNDFVSDADSTLIGDCATVHTANKWDLIISDMYDPRTKHKVTKENDSKEGF 6924  
PTGTLLVDSDLNDFVSDADSTLIGDCATVHTANKWDLIISDMYDPRTKHKVTKENDSKEGF 6924  
PTGTLLVDSDLNDFVSDADSTLIGDCATVHTANKWDLIISDMYDPKTKHVLKDNDSKEGF 6918  
PTGTLLVDSDLNDFVSDADSTLIGDCATVHTANKWDLIISDMYDPKTKHKVTKENDSKEGF 6922  
PTGALLVDSDLNDFVSDADSTLIGDCATVHTANKWDLIISDMYDPKTKHKVTKENDSKEGF 6930  
PIGTLLVDSDLNDFVSDADSTLIGDCATVHTANKWDLIISDMYDPKTKHKVTKENDSKEGF 6919  
PIGTLLVDSDLNDFVSDADSTLIGECATVHTANKWDLIISDMYDPKTKHKVTKENDSKEGF 6919  
PIGTLLVDSDLNDFVSDADSTLIGECATVHTANKWDLIISDMYDPKTKHKVTKENDSKEGF 6726

QHN73794  
SP P0C6X7 | R1AB\_CVHSA  
TR Q6UZF5 | Q6UZF5\_CVHSA  
TR Q6UZF1 | Q6UZF1\_CVHSA  
TR Q6JH48 | Q6JH48\_CVHSA  
TR Q692E6 | Q692E6\_CVHSA  
TR A0A0K1YZY7 | A0A0K1YZY7\_CVHSA  
SP P0C6W2 | R1AB\_BCHK3  
SP P0C6W6 | R1AB\_BCRP3  
SP P0C6V9 | R1AB\_BC279  
TR A0A0U1WHI4 | A0A0U1WHI4\_CVHSA  
TR A0A0U1WHG0 | A0A0U1WHG0\_CVHSA  
TR A0A166ZL34 | A0A166ZL34\_9NIDO  
TR R9QTB2 | R9QTB2\_CVHSA  
TR R9QTH2 | R9QTH2\_CVHSA  
SP P0C6U8 | R1A\_CVHSA  
TR Q6JH47 | Q6JH47\_CVHSA  
TR Q692E5 | Q692E5\_CVHSA  
SP P0C6F8 | R1A\_BCHK3  
TR A0A0K1Z0N1 | A0A0K1Z0N1\_CVHSA  
SP P0C6F5 | R1A\_BC279  
SP P0C6T7 | R1A\_BCRP3

FTYLCGFIQKQKALGGSIAVKITEHSWNADLYKLMGHFAWWTAFVTNVNASSSEAFLLIGC 7007  
FTYLCGFIQKQKALGGSIAVKITEHSWNADLYKLMGHFSWWTAFVTNVNASSSEAFLLIGA 6984  
FTYLCGFIQKQKALGGSIAVKITEHSWNADLYKLMGHFSWWTAFVTNVNASSSEAFLLIGA 6984  
FTYLCGFIQKQKALGGSIAVKITEHSWNADLYKLMGHFSWWTAFVTNVNASSSEAFLLIGA 6984  
FTYLCGFIQKQKALGGSIAVKITEHSWNADLYKLMGHFSWWTAFVTNVNASSSEAFLLIGA 6984  
FTYLCGFIQKQKALGGSAAVKITEHSWNADLYKLMGHFSWWTAFVTNVNASSSEAFLLIGV 6984  
FTYLCGFIQKQKALGGSVAVKITEHSWNADLYKLMGHFSWWTAFVTNVNASSSEAFLLIGV 6978  
FTYLCGFIQKQKALGGSVAVKITEHSWNADLYKLMGHFSWWTAFVTNVNASSSEAFLLIGV 6982  
FTYLCGFIQKQKALGGSVAVKITEHSWNADLYKLMGHFSWWTAFVTNVNASSSEAFLLIGV 6990  
FTYLCGFIQKQKALGGSVAVKITEHSWNADLYKLMGYFSWWTAFVTNVNASSSEAFLLIGV 6979  
FTYLCGFIQKQKALGGSVAVKITEHSWNADLYKLMGHFSWWTAFVTNVNASSSEAFLLIGV 6979  
FTYLCGFIQKQKALGGSVAVKITEHSWNADLYKLMGHFSWWTAFVTNVNASSSEAFLLIGV 6786

QHN73794  
SP P0C6X7 | R1AB\_CVHSA  
TR Q6UZF5 | Q6UZF5\_CVHSA  
TR Q6UZF1 | Q6UZF1\_CVHSA  
TR Q6JH48 | Q6JH48\_CVHSA  
TR Q692E6 | Q692E6\_CVHSA  
TR A0A0K1YZY7 | A0A0K1YZY7\_CVHSA  
SP P0C6W2 | R1AB\_BCHK3  
SP P0C6W6 | R1AB\_BCRP3  
SP P0C6V9 | R1AB\_BC279  
TR A0A0U1WHI4 | A0A0U1WHI4\_CVHSA  
TR A0A0U1WHG0 | A0A0U1WHG0\_CVHSA  
TR A0A166ZL34 | A0A166ZL34\_9NIDO  
TR R9QTB2 | R9QTB2\_CVHSA  
TR R9QTH2 | R9QTH2\_CVHSA  
SP P0C6U8 | R1A\_CVHSA  
TR Q6JH47 | Q6JH47\_CVHSA  
TR Q692E5 | Q692E5\_CVHSA  
SP P0C6F8 | R1A\_BCHK3  
TR A0A0K1Z0N1 | A0A0K1Z0N1\_CVHSA  
SP P0C6F5 | R1A\_BC279  
SP P0C6T7 | R1A\_BCRP3

NYLGKPKREQIDGYTMHANYIFWRNTNPIQLSSYSLFDMSKFPLKLRGTAVMSLKEGQIND 7067  
NYLGKPKREQIDGYTMHANYIFWRNTNPIQLSSYSLFDMSKFPLKLRGTAVMSLKENQIND 7044  
NYLGKPKREQIDGYTMHANYIFWRNTNPIQLSSYSLFDMSKFPLKLRGTAVMSLKENQIND 7044  
NYLGKPKREQIDGYTMHANYIFWRNTNPIQLSSYSLFDMSKFPLKLRGTAVMSLKENQIND 7044  
NYLGKPKREQIDGYTMHANYIFWRNTNPIQLSSYSLFDMSKFPLKLRGTAVMSLKENQIND 7044  
NYLGKPKREQIDGYTMHANYIFWRNTNPIQLSSYSLFDMSKFPLKLRGTAVMSLKENQIND 7044  
NYLGKPKREQIDGYTMHANYIFWRNTNPIQLSSYSLFDMSKFPLKLRGTAVMSLKENQIND 7038  
NYLGKPKREQIDGYTMHANYIFWRNTNPIQLSSYSLFDMSKFPLKLRGTAVMSLKENQIND 7042  
NYLGKPREQIDGYTMHANYIFWRNTNPIQLSSYSLFDMSKFPLKLRGTAVMSLKENQIND 7050  
NYLGKPKREQIDGYTMHANYVFWRNTNPIQLSSYSLFDMSKFPLKLRGTAVMSLKENQIND 7039  
NYLGKPKREQIDGYTMHANYIFWRNTNPIQLSSYSLFDMSKFPLKLRGTAVMSLKENQIND 7039  
NYLGKPKREQIDGYTMHANYIFWRNTNPIQLSSYSLFDMSKFPLKLRGTAVMSLKENQIND 6846
