# Supplementary material for: Structural Genomics of SARS-CoV-2 Indicates Evolutionary Conserved Functional Regions of Viral Proteins
Source: MDPI journal article supplement (doi:10.3390/v12040360), 2020-03-25
Supplement: s1 [file s1]

**Supplementary File 1. Ligand binding sites mapped on the sequence of wN protein aligned with the closest homologs found in UniProt.**

Ligand BS:

|                                                                                   |                                                                                           |
|-----------------------------------------------------------------------------------|-------------------------------------------------------------------------------------------|
|  | N-2~,N-2~-DIMETHYL-N-1~-(6-OXO-5,6-DIHYDROPHENANTHRIDIN-2-YL)GLYCINAMIDE (4KXJ-P34, OC43) |
|  | ADENOSINE MONOPHOSPHATE (4LI4-AMP, OC43)                                                  |
|  | URIDINE-5'-MONOPHOSPHATE (4LM7-U5P, OC43)                                                 |
|  | GUANOSINE-5'-MONOPHOSPHATE (4LM9-5GP, OC43)                                               |
|  | CYTIDINE-5'-MONOPHOSPHATE (4LMC-C5P, OC43)                                                |
|  | 6-chloranyl-7-(2-morpholin-4-ylethylamino)quinoline-5,8-dione (4LMT-CQD,OC43)             |

CLUSTAL O(1.2.4) multiple sequence alignment

|                                |                                                              |     |                                                                                     |
|--------------------------------|--------------------------------------------------------------|-----|-------------------------------------------------------------------------------------|
|                                |                                                              |     | 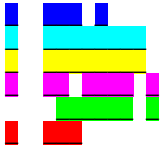 |
| YP_009724397                   | MSDNGPQ-NQRNAPRITFGGPSDSTGSNQNGERSGARSKQRRPQGLPNNTASWFTALTQH | 59  |                                                                                     |
| SP P59595 NCAP_CVHSA           | MSDNGPQSNQRSAPRITFGGPTDSTDNNQNGGRNGARPKQRRPQGLPNNTASWFTALTQH | 60  |                                                                                     |
| TR Q6UZF2 Q6UZF2_CVHSA         | MSDNGPQSNQRSAPRITFGGPTDSTDNNQNGGRNGARPKQRRPQGLPNNTASWFTALTQH | 60  |                                                                                     |
| TR Q6JH41 Q6JH41_CVHSA         | MSDNGPQSNQRSAPRITFGGPTDSTDNNQNGGRNGARPKQRRPQGLPNNTASWFTALTQH | 60  |                                                                                     |
| TR Q6UZE8 Q6UZE8_CVHSA         | MSDNGPQSNQRSAPRITFGGPTDSTDNNQNGGRNGARPKQRRPQGLPNNTASWFTALTQH | 60  |                                                                                     |
| TR Q692D7 Q692D7_CVHSA         | MSDNGPQSNQRSAPRITFGGPTDSTDNNQNGGRNGARPKQRRPQGLPNNTASWFTALTQH | 60  |                                                                                     |
| TR R9QTB4 R9QTB4_CVHSA         | MSDNGPQ-NQRSAPRITFGGPSDSTDNNQDGGRSGARPKQRRPQGLPNNTASWFTALTQH | 59  |                                                                                     |
| SP Q3I5I7 NCAP_BCRP3           | MSDNGPQ-NQRSAPRITFGGPTDSTDNNQDGGRSGARPKQRRPQGLPNNTASWFTALTQH | 59  |                                                                                     |
| TR A0A0K1YZZ7 A0A0K1YZZ7_CVHSA | MSDNGPH-NQRSASRITFGGPTDSTDNNQNGGRNGARPKQRRPQGLPNNTASWFTALTQH | 59  |                                                                                     |
| TR R9QTA2 R9QTA2_CVHSA         | MSDNGPQ-NQRSAPRITFGGPTDSTDNNQDGGRSGARPKQRRPQGLPNNTASWFTALTQH | 60  |                                                                                     |
| SP Q3LZX4 NCAP_BCHK3           | MSDNGPQ-SQRSAPRITFGGPADSDNNQDGGRSGARPKQRRPQGLPNNTASWFTALTQH  | 59  |                                                                                     |
| TR A0A0U1WHJ1 A0A0U1WHJ1_CVHSA | MSDNGPQ-NQRSAPRITFGGPSDSTDNNQDGGRSQVRPKQRRPQGLPNNTASWFTALTQH | 59  |                                                                                     |
| SP Q0Q468 NCAP_BC279           | MSDNGPQ-NQRSAPRITFGGPSDSTDNNQDGGRSGARPKQRRPQGLPNNTASWFTALTQH | 59  |                                                                                     |
| TR A0A166ZLE5 A0A166ZLE5_9NIDO | MSDNGTQ-NQRSASRITFGGPSDSTDNNQDGGRSGARPKQRRPQGLPNNTASWFTALTQH | 59  |                                                                                     |
| TR A0A0U1UZD6 A0A0U1UZD6_CVHSA | MSDNGTQ-NQRSASRITFGGPSDSTDNNQDGGRSGARPKQRRPQGLPNNTASWFTALTQH | 59  |                                                                                     |
|                                | ***** : .*. * *****:*. .*. * *. * . * *****                  |     |  |
| YP_009724397                   | GKEDLKFPQGQVPINTNSPDDQIGYYRRATRRVRGGDGKMKDLSPRWYFYLLGTGPEA   | 119 |                                                                                     |
| SP P59595 NCAP_CVHSA           | GKEELRFPRQGQVPINTNSGPDDQIGYYRRATRRVRGGDGKMKELSPRWYFYLLGTGPEA | 120 |                                                                                     |
| TR Q6UZF2 Q6UZF2_CVHSA         | GKEELRFPRQGQVPINTNSGPDDQIGYYRRATRRVRGGDGKMKELSPRWYFYLLGTGPEA | 120 |                                                                                     |
| TR Q6JH41 Q6JH41_CVHSA         | GKEELRFPRQGQVPINTNSGPDDQIGYYRRATRRVRGGDGKMKELSPRWYFYLLGTGPEA | 120 |                                                                                     |
| TR Q6UZE8 Q6UZE8_CVHSA         | GKEELRFPRQGQVPINTNSGPDDQIGYYRRATRRVRGGDGKMKELSPRWYFYLLGTGPEA | 120 |                                                                                     |
| TR Q692D7 Q692D7_CVHSA         | GKEELRFPRQGQVPINTNSGPDDQIGFYRRATRRVRGGDGKMKELSPRWYFYLLGTGPEA | 120 |                                                                                     |
| TR R9QTB4 R9QTB4_CVHSA         | GKEELRFPRQGQVPINTNSGKDDQIGYYRRATRRVRGGDGKMKELSPRWYFYLLGTGPEA | 119 |                                                                                     |
| SP Q3I5I7 NCAP_BCRP3           | GKEELRFPRQGQVPINTNSGKDDQIGYYRRATRRVRGGDGKMKELSPRWYFYLLGTGPEA | 119 |                                                                                     |
| TR A0A0K1YZZ7 A0A0K1YZZ7_CVHSA | GKEELRFPRQGQVPINTNSGPDDQIGYYRRATRRVRGGDGKMKELSPRWYFYLLGTGPEA | 119 |                                                                                     |
| TR R9QTA2 R9QTA2_CVHSA         | GKEELRFPRQGQVPINTNSGKDDQIGYYRRATRRVRGGDGKMKELSPRWYFYLLGTGPEA | 120 |                                                                                     |
| SP Q3LZX4 NCAP_BCHK3           | GKEELRFPRQGQVPINTNSGKDDQIGYYRRATRRVRGGDGKMKELSPRWYFYLLGTGPEA | 119 |                                                                                     |
| TR A0A0U1WHJ1 A0A0U1WHJ1_CVHSA | GKEGLKFPQGQVPINTNSGRDDQIGYYRRATRRVRGGDGKMKELSPRWYFYLLGTGPEA  | 119 |                                                                                     |
| SP Q0Q468 NCAP_BC279           | GKEELRFPRQGQVPINTNSGKDDQIGYYRRATRRVRGGDGKMKELSPRWYFYLLGTGPEA | 119 |                                                                                     |
| TR A0A166ZLE5 A0A166ZLE5_9NIDO | GKEGLKFPQGQVPINTNSGDDQIGYYRRATRRVRGGDGKMKELSPRWYFYLLGTGPEA   | 119 |                                                                                     |
| TR A0A0U1UZD6 A0A0U1UZD6_CVHSA | GKEGLKFPQGQVPINTNSGRDDQIGYYRRATRRVRGGDGKMKELSPRWYFYLLGTGPEA  | 119 |                                                                                     |
|                                | *** *:*****. *****:*****:*****.*****                         |     |                                                                                     |

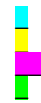

\*\*\*\*\*:\*\*\*:\*\*\*\*\* \*\*\*\*\* \*\*\*\*\* \*\*\*\*\* \*\*\*\*\* \*\*\*\*\* \*\*\*\*\* \*\*\*\*\* \*\*\*\*\*

\*\*\*\*\*

\*\*\*\*\*

• \*\*\*\*\*

```

YP_009724397
SP|P59595|NCAP_CVHSA YKTFPPTEPKKDKKKKADETAQALPQRQKKQPTVTLLPAADLDDFSKQLQQSMSSADSTQA 419
TR|Q6UZF2|Q6UZF2_CVHSA YKTFPPTEPKKDKKKKTDEAQPLPQRQKKQPTVTLLPAADMDDFSRQLQNSMSGASADST 420
TR|Q6JH41|Q6JH41_CVHSA YKTFPPTEPKKDKKKKTDEAQPLPQRQKKQPTVTLLPAADMDDFSRQLQNSMSGASADST 420
TR|Q6UZE8|Q6UZE8_CVHSA YKTFPPTEPKKDKKKKTDEAQPLPQRQKKQPTVTLLPAADMDDFSRQLQNSMSGASADST 420
TR|Q692D7|Q692D7_CVHSA YKTFPPTEPKKDKKKKTDEAQPLPQRQKKQPTVTLLPAADMDDFSRQLQNSMSGASADST 420
TR|R9QTB4|R9QTB4_CVHSA YKTFPPTEPKKDKKKKTDEAQPLPQRK-KQPTVTLLPAADMDDFSRQLQNSMSGASADST 418
SP|Q3I5I7|NCAP_BCRP3 YKIFPPTEPKKDKKKKTDEAQPLPQRQKKQPTVTLLPAADMDDFSRQLQNSMSGASADST 419
TR|A0A0K1YZZ7|A0A0K1YZZ7_CVHSA YKTFPPTEPKKDKKKKTDEAQPLPQRQKKQPTVTLLPAADMDDFSRQLQNSMSGASADST 419
TR|R9QTA2|R9QTA2_CVHSA YKTFPPTEPKKDKKKKTDEAQPLPQRQKKQPTVTLLPAADMDDFSRQLQNSMSGASADST 420
SP|Q3LZX4|NCAP_BCHK3 YKTFPPTEPKKDKKKKTDEAQPLPQRQKKQPTVTLLPAADMDDFSRQLQNSMSGASADST 419
TR|A0A0U1WHJ1|A0A0U1WHJ1_CVHSA YKTFPPTEPKKDKKKKTDEAQPLPQRQKKQPTVTLLPAADMDDFSRQLQNSMSGASADST 419
SP|Q0Q468|NCAP_BC279 YKAFPPTEPKKDKKKKTDEAQPLPQRK-KQPTVTLLPAADMDDFSRQLQNSMSGASADST 418
TR|A0A166ZLE5|A0A166ZLE5_9NIDO YKTFPPTEPKKDKKKKTDEAQPLPQRK-KQPTVTLLPAADMDDFSRQLQNSMSGASADST 418
TR|A0A0U1UZD6|A0A0U1UZD6_CVHSA YKTFPPTEPKKDKKKKTDEAQPLPQRK-KQPTVTLLPAADMDDFSRQLQNSMSGASADST 418
** *****: ** : * ****: * * *****: *****: *****: *****: *.: .:

```

```

YP_009724397
SP|P59595|NCAP_CVHSA QA 422
TR|Q6UZF2|Q6UZF2_CVHSA QA 422
TR|Q6JH41|Q6JH41_CVHSA QA 422
TR|Q6UZE8|Q6UZE8_CVHSA QA 422
TR|Q692D7|Q692D7_CVHSA QA 422
TR|R9QTB4|R9QTB4_CVHSA QA 420
SP|Q3I5I7|NCAP_BCRP3 QA 421
TR|A0A0K1YZZ7|A0A0K1YZZ7_CVHSA QA 421
TR|R9QTA2|R9QTA2_CVHSA QA 422
SP|Q3LZX4|NCAP_BCHK3 QA 421
TR|A0A0U1WHJ1|A0A0U1WHJ1_CVHSA QA 421
SP|Q0Q468|NCAP_BC279 QA 420
TR|A0A166ZLE5|A0A166ZLE5_9NIDO QA 420
TR|A0A0U1UZD6|A0A0U1UZD6_CVHSA QA 420

```
