# Supplementary material for: Structural Genomics of SARS-CoV-2 Indicates Evolutionary Conserved Functional Regions of Viral Proteins
Source: MDPI journal article supplement (doi:10.3390/v12040360), 2020-03-25
Supplement: s1 [file s1]

**Supplementary File 6. Ligand binding sites mapped on the sequence of wNsp14 protein aligned with the closest homologs found in UniProt.**

 GUANOSINE-P3-ADENOSINE-5',5'-TRIPHOSPHATE (5C8S-G3A, SARS)

 S-ADENOSYL-L-HOMOCYSTEINE (5C8S-SAH, SARS)

 S-ADENOSYLMETHIONINE (5C8T-SAM, SARS)

|                                    |  |                                                                |      |
|------------------------------------|--|----------------------------------------------------------------|------|
| QHN73794                           |  | VIFTQTTTETAHSCNVNRFNVAITRAKIGILCIMSDDRDLVDKLFQTSLEIPRRNVATLQAE | 5927 |
| SP   P0C6X7   R1AB_CVHSA           |  | VIFTQTTTETAHSCNVNRFNVAITRAKIGILCIMSDDRDLVDKLFQTSLEIPRRNVATLQAE | 5904 |
| TR   Q6UZF5   Q6UZF5_CVHSA         |  | VIFTQTTTETAHSCNVNRFNVAITRAKIGILCIMSDDRDLVDKLFQTSLEIPRRNVATLQAE | 5904 |
| TR   Q6UZF1   Q6UZF1_CVHSA         |  | VIFTQTTTETAHSCNVNRFNVAITRAKIGILCIMSDDRDLVDKLFQTSLEIPRRNVATLQAE | 5904 |
| TR   Q6JH48   Q6JH48_CVHSA         |  | VIFTQTTTETAHSCNVNRFNVAITRAKIGILCIMSDDRDLVDKLFQTSLEIPRRNVATLQAE | 5904 |
| TR   Q692E6   Q692E6_CVHSA         |  | VIFTQTTTETAHSCNVNRFNVAITRAKIGILCIMSDDRDLVDKLFQTSLEIPRRNVATLQAE | 5904 |
| TR   A0A0K1YZY7   A0A0K1YZY7_CVHSA |  | VIFTQTTTETAHSCNVNRFNVAITRAKIGILCIMSDDRDLVDKLFQTSLEIPRRNVATLQAE | 5904 |
| SP   P0C6W2   R1AB_BCHK3           |  | VIFTQTTTETAHSCNVNRFNVAITRAKIGILCIMSDDRDLVDKLFQTSLEIPRRNVATLQAE | 5898 |
| SP   P0C6W6   R1AB_BCRP3           |  | VIFTQTTTETAHSCNVNRFNVAITRAKIGILCIMSDDRDLVDKLFQTSLEIPRRNVATLQAE | 5902 |
| SP   P0C6V9   R1AB_BC279           |  | VIFTQTTTETAHSCNVNRFNVAITRAKIGILCIMSDDRDLVDKLFQTSLEIPRRNVATLQAE | 5910 |
| TR   A0A0U1WHI4   A0A0U1WHI4_CVHSA |  | VIFTQTTTETAHSCNVNRFNVAITRAKIGILCIMSDDRDLVDKLFQTSLEIPRRNVATLQAE | 5899 |
| TR   A0A0U1WHG0   A0A0U1WHG0_CVHSA |  | VIFTQTTTETAHSCNVNRFNVAITRAKIGILCIMSDDRDLVDKLFQTSLEIPRRNVATLQAE | 5899 |
| TR   A0A166ZL34   A0A166ZL34_9NIDO |  | VIFTQTTTETAHSCNVNRFNVAITRAKIGILCIMSDDRDLVDKLFQTSLEIPRRNVATLQAE | 5706 |
| TR   R9QTB2   R9QTB2_CVHSA         |  | -----                                                          |      |
| TR   R9QTH2   R9QTH2_CVHSA         |  | -----                                                          |      |
| SP   P0C6U8   R1A_CVHSA            |  | -----                                                          |      |
| TR   Q6JH47   Q6JH47_CVHSA         |  | -----                                                          |      |
| TR   Q692E5   Q692E5_CVHSA         |  | -----                                                          |      |
| SP   P0C6F8   R1A_BCHK3            |  | -----                                                          |      |
| TR   A0A0K1Z0N1   A0A0K1Z0N1_CVHSA |  | -----                                                          |      |
| SP   P0C6F5   R1A_BC279            |  | -----                                                          |      |
| SP   P0C6T7   R1A_BCRP3            |  | -----                                                          |      |

|                                    |  |                                                              |      |
|------------------------------------|--|--------------------------------------------------------------|------|
| QHN73794                           |  | NVTGLFKDCSKVITGLHPTQAPTHLSVDTKFKTEGLCVDIPGIPKDMTYRRLISMMGFKM | 5987 |
| SP   P0C6X7   R1AB_CVHSA           |  | NVTGLFKDCSKVITGLHPTQAPTHLSVDIKFKTEGLCVDIPGIPKDMTYRRLISMMGFKM | 5964 |
| TR   Q6UZF5   Q6UZF5_CVHSA         |  | NVTGLFKDCSKVITGLHPTQAPTHLSVDIKFKTEGLCVDIPGIPKDMTYRRLISMMGFKM | 5964 |
| TR   Q6UZF1   Q6UZF1_CVHSA         |  | NVTGLFKDCSKVITGLHPTQAPTHLSVDIKFKTEGLCVDIPGIPKDMTYRRLISMMGFKM | 5964 |
| TR   Q6JH48   Q6JH48_CVHSA         |  | NVTGLFKDCSKVITGLHPTQAPTHLSVDIKFKTEGLCVDIPGIPKDMTYRRLISMMGFKM | 5964 |
| TR   Q692E6   Q692E6_CVHSA         |  | NVTGLFKDCSKVITGLHPTQAPTHLSVDIKFKTEGLCVDIPGIPKDMTYRRLISMMGFKM | 5964 |
| TR   A0A0K1YZY7   A0A0K1YZY7_CVHSA |  | NVTGLFKDCSKVITGLHPTQAPTHLSVDTKFKTEGLCVDIPGIPKDMTYRRLISMMGFKM | 5964 |
| SP   P0C6W2   R1AB_BCHK3           |  | NVTGLFKDCSKVITGLHPTQAPTHLSVDTKFKTEGLCVDIPGIPKDMTYRRLISMMGFKM | 5958 |
| SP   P0C6W6   R1AB_BCRP3           |  | NVTGLFKDCSKVITGLHPTQAPTHLSVDTKFKTEGLCVDIPGIPKDMTYRRLISMMGFKM | 5962 |
| SP   P0C6V9   R1AB_BC279           |  | NVTGLFKDCSKVITGLHPTQAPTHLSVDTKFKTEGLCVDIPGIPKDMTYRRLISMMGFKM | 5970 |
| TR   A0A0U1WHI4   A0A0U1WHI4_CVHSA |  | NVTGLFKDCSKVITGLHPTQAPTHLSVDTKFKTEGLCVDIPGIPKDMTYRRLISMMGFKM | 5959 |
| TR   A0A0U1WHG0   A0A0U1WHG0_CVHSA |  | NVTGLFKDCSKVITGLHPTQAPTHLSVDTKFKTEGLCVDIPGIPKDMTYRRLISMMGFKM | 5959 |
| TR   A0A166ZL34   A0A166ZL34_9NIDO |  | NVTGLFKDCSKVITGLHPTQAPTHLSVDTKFKTEGLCVDIPGIPKDMTYRRLISMMGFKM | 5766 |
| TR   R9QTB2   R9QTB2_CVHSA         |  | -----                                                        |      |
| TR   R9QTH2   R9QTH2_CVHSA         |  | -----                                                        |      |
| SP   P0C6U8   R1A_CVHSA            |  | -----                                                        |      |
| TR   Q6JH47   Q6JH47_CVHSA         |  | -----                                                        |      |
| TR   Q692E5   Q692E5_CVHSA         |  | -----                                                        |      |
| SP   P0C6F8   R1A_BCHK3            |  | -----                                                        |      |
| TR   A0A0K1Z0N1   A0A0K1Z0N1_CVHSA |  | -----                                                        |      |
| SP   P0C6F5   R1A_BC279            |  | -----                                                        |      |
| SP   P0C6T7   R1A_BCRP3            |  | -----                                                        |      |

|                                    |  |                                                              |      |
|------------------------------------|--|--------------------------------------------------------------|------|
| QHN73794                           |  | NYQVNGYPNMFITREEAIRHVRRAWIGFDVEGCHATREAVGTNPLQLGFSTGVNLVAVPT | 6047 |
| SP   P0C6X7   R1AB_CVHSA           |  | NYQVNGYPNMFITREEAIRHVRRAWIGFDVEGCHATREAVGTNPLQLGFSTGVNLVAVPT | 6024 |
| TR   Q6UZF5   Q6UZF5_CVHSA         |  | NYQVNGYPNMFITREEAIRHVRRAWIGFDVEGCHATREAVGTNPLQLGFSTGVNLVAVPT | 6024 |
| TR   Q6UZF1   Q6UZF1_CVHSA         |  | NYQVNGYPNMFITREEAIRHVRRAWIGFDVEGCHATREAVGTNPLQLGFSTGVNLVAVPT | 6024 |
| TR   Q6JH48   Q6JH48_CVHSA         |  | NYQVNGYPNMFITREEAIRHVRRAWIGFDVEGCHATREAVGTNPLQLGFSTGVNLVAVPT | 6024 |
| TR   Q692E6   Q692E6_CVHSA         |  | NYQVNGYPNMFITREEAIRHVRRAWIGFDVEGCHATREAVGTNPLQLGFSTGVNLVAVPT | 6024 |
| TR   A0A0K1YZY7   A0A0K1YZY7_CVHSA |  | NYQVNGYPNMFITREEAIRHVRRAWIGFDVEGCHATREAVGTNPLQLGFSTGVNLVAVPT | 6024 |
| SP   P0C6W2   R1AB_BCHK3           |  | NYQVNGYPNMFITREEAIRHVRRAWIGFDVEGCHATREAVGTNPLQLGFSTGVNLVAVPT | 6018 |
| SP   P0C6W6   R1AB_BCRP3           |  | NYQVNGYPNMFITREEAIRHVRRAWIGFDVEGCHATREAVGTNPLQLGFSTGVNLVAVPT | 6022 |
| SP   P0C6V9   R1AB_BC279           |  | NYQVNGYPNMFITREEAIRHVRRAWIGFDVEGCHATREAVGTNPLQLGFSTGVNLVAVPT | 6030 |
| TR   A0A0U1WHI4   A0A0U1WHI4_CVHSA |  | NYQVNGYPNMFITREEAIRHVRRAWIGFDVEGCHATREAVGTNPLQLGFSTGVNLVAVPT | 6019 |
| TR   A0A0U1WHG0   A0A0U1WHG0_CVHSA |  | NYQVNGYPNMFITREEAIRHVRRAWIGFDVEGCHATREAVGTNPLQLGFSTGVNLVAVPT | 6019 |
| TR   A0A166ZL34   A0A166ZL34_9NIDO |  | NYQVNGYPNMFITREEAIRHVRRAWIGFDVEGCHATREAVGTNPLQLGFSTGVNLVAVPT | 5826 |
| TR   R9QTB2   R9QTB2_CVHSA         |  | -----                                                        |      |
| TR   R9QTH2   R9QTH2_CVHSA         |  | -----                                                        |      |
| SP   P0C6U8   R1A_CVHSA            |  | -----                                                        |      |
| TR   Q6JH47   Q6JH47_CVHSA         |  | -----                                                        |      |
| TR   Q692E5   Q692E5_CVHSA         |  | -----                                                        |      |
| SP   P0C6F8   R1A_BCHK3            |  | -----                                                        |      |
| TR   A0A0K1Z0N1   A0A0K1Z0N1_CVHSA |  | -----                                                        |      |
| SP   P0C6F5   R1A_BC279            |  | -----                                                        |      |
| SP   P0C6T7   R1A_BCRP3            |  | -----                                                        |      |

|          |                             |                                                             |      |
|----------|-----------------------------|-------------------------------------------------------------|------|
| QHN73794 |                             | GYVDTPNNTDFSRVSAKPPPGDQFKHLIPLMYKGLPWNVVRKIVQMLSDTLKNLSDRVV | 6107 |
| SP       | P0C6X7 R1AB_CVHSA           | GYVDTENNTEFTRVNAKPPPGDQFKHLIPLMYKGLPWNVVRKIVQMLSDTLKGLSDRVV | 6084 |
| TR       | Q6UZF5 Q6UZF5_CVHSA         | GYVDTENNTEFTRVNAKPPPGDQFKHLIPLMYKGLPWNVVRKIVQMLSDTLKGLSDRVV | 6084 |
| TR       | Q6UZF1 Q6UZF1_CVHSA         | GYVDTENNTEFTRVNAKPPPGDQFKHLIPLMYKGLPWNVVRKIVQMLSDTLKGLSDRVV | 6084 |
| TR       | Q6JH48 Q6JH48_CVHSA         | GYVDTENNTEFTRVNAKPPPGDQFKHLIPLMYKGLPWNVVRKIVQMLSDTLKGLSDRVV | 6084 |
| TR       | Q692E6 Q692E6_CVHSA         | GYVDTENNTEFTRVNAKPPPGDQFKHLIPLMYKGLPWNVVRKIVQMLSDTLKGLSDRVV | 6084 |
| TR       | A0A0K1YZY7 A0A0K1YZY7_CVHSA | GYVDTENNTEFTRVNAKPPPGDQFKHLIPLMYKGLPWNVVRKIVQMLSDTLKGLSDRVV | 6084 |
| SP       | P0C6W2 R1AB_BCHK3           | GYVDTENSTEFTRVNAKPPPGDQFKHLIPLMYKGLPWNVVRKIVQMLSDTLKGLSDRVV | 6078 |
| SP       | P0C6W6 R1AB_BCRP3           | GYVDTENNTEFTRVNAKPPPGDQFKHLIPLMYKGLPWNVVRKIVQMLSDTLKGLSDRVV | 6082 |
| SP       | P0C6V9 R1AB_BC279           | GYVDTENNTEFTRVNAKPPPGDQFKHLIPLMYKGLPWNVVRKIVQMLSDTLKGLSDRVV | 6090 |
| TR       | A0A0U1WHI4 A0A0U1WHI4_CVHSA | GYVDTENNTEFTRVNAKPPPGDQFKHLIPLMYKGLPWNVVRKIVQMLSDTLKGLSDRVV | 6079 |
| TR       | A0A0U1WHG0 A0A0U1WHG0_CVHSA | GYVDTENNTEFTRVNAKPPPGDQFKHLIPLMYKGLPWSVVRKIVQMLSDTLKGLSDRVV | 6079 |
| TR       | A0A166ZL34 A0A166ZL34_9NIDO | GYVDTENNTEFTRVNAKPPPGDQFKHLIPLMYKGLPWSVVRKIVQMLSDTLKGLSDRVV | 5886 |
| TR       | R9QTB2 R9QTB2_CVHSA         | -----                                                       |      |
| TR       | R9QTH2 R9QTH2_CVHSA         | -----                                                       |      |
| SP       | P0C6U8 R1A_CVHSA            | -----                                                       |      |
| TR       | Q6JH47 Q6JH47_CVHSA         | -----                                                       |      |
| TR       | Q692E5 Q692E5_CVHSA         | -----                                                       |      |
| SP       | P0C6F8 R1A_BCHK3            | -----                                                       |      |
| TR       | A0A0K1Z0N1 A0A0K1Z0N1_CVHSA | -----                                                       |      |
| SP       | P0C6F5 R1A_BC279            | -----                                                       |      |
| SP       | P0C6T7 R1A_BCRP3            | -----                                                       |      |

|          |                             |                                                              |      |
|----------|-----------------------------|--------------------------------------------------------------|------|
| QHN73794 |                             | FVLWAHGFELTSMKYFVKIGPERTCCLCDRRATCFSTASDTYACWHHSIGFDYVYNPFMI | 6167 |
| SP       | P0C6X7 R1AB_CVHSA           | FVLWAHGFELTSMKYFVKIGPERTCCLCDKRATCFSTSSDTYACWNHSGFDYVYNPFMI  | 6144 |
| TR       | Q6UZF5 Q6UZF5_CVHSA         | FVLWAHGFELTSMKYFVKIGPERTCCLCDKRATCFSTSSDTYACWNHSGFDYVYNPFMI  | 6144 |
| TR       | Q6UZF1 Q6UZF1_CVHSA         | FVLWAHGFELTSMKYFVKIGPERTCCLCDKRATCFSTSSDTYACWNHSGFDYVYNPFMI  | 6144 |
| TR       | Q6JH48 Q6JH48_CVHSA         | FVLWAHGFELTSMKYFVKIGPERTCCLCDKRATCFSTSSDTYACWNHSGFDYVYNPFMI  | 6144 |
| TR       | Q692E6 Q692E6_CVHSA         | FVLWAHGFELTSMKYFVKIGPERTCCLCDKRATCFSTSSDTYACWNHSGFDYVYNPFMI  | 6144 |
| TR       | A0A0K1YZY7 A0A0K1YZY7_CVHSA | FVLWAHGFELTSMKYFVKIGPERTCCLCDKRATCFSTSSDTYACWNHSGFDYVYNPFMI  | 6144 |
| SP       | P0C6W2 R1AB_BCHK3           | FVLWAHGFELTSMKYFVKIGPERTCCLCDKRATCFSTSSDTYACWNHSGFDYVYNPFMI  | 6138 |
| SP       | P0C6W6 R1AB_BCRP3           | FVLWAHGFELTSMKYFVKIGPERTCCLCDKRATCFSTSSDTYACWNHSGFDYVYNPFMI  | 6142 |
| SP       | P0C6V9 R1AB_BC279           | FVLWAHGFELTSMKYFVKIGPERTCCLCDRRATCFSTSSDTYACWNHSGFDYVYNPFMI  | 6150 |
| TR       | A0A0U1WHI4 A0A0U1WHI4_CVHSA | FVLWAHGFELTSMKYFVKIGPERTCCLCDKRATCFSTSSDTYACWNHSGFDYVYNPFMI  | 6139 |
| TR       | A0A0U1WHG0 A0A0U1WHG0_CVHSA | FVLWAHGFELTSMKYFVKIGPERTCCLCDKRATCFSTSSDTYACWNHSGFDYVYNPFMI  | 6139 |
| TR       | A0A166ZL34 A0A166ZL34_9NIDO | FVLWAHGFELTSMKYFVKIGSERTCCLCDKRATCFSTSSDTYACWNHSGFDYVYNPFMI  | 5946 |
| TR       | R9QTB2 R9QTB2_CVHSA         | -----                                                        |      |
| TR       | R9QTH2 R9QTH2_CVHSA         | -----                                                        |      |
| SP       | P0C6U8 R1A_CVHSA            | -----                                                        |      |
| TR       | Q6JH47 Q6JH47_CVHSA         | -----                                                        |      |
| TR       | Q692E5 Q692E5_CVHSA         | -----                                                        |      |
| SP       | P0C6F8 R1A_BCHK3            | -----                                                        |      |
| TR       | A0A0K1Z0N1 A0A0K1Z0N1_CVHSA | -----                                                        |      |
| SP       | P0C6F5 R1A_BC279            | -----                                                        |      |
| SP       | P0C6T7 R1A_BCRP3            | -----                                                        |      |

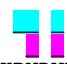

|          |                             |                                                              |      |
|----------|-----------------------------|--------------------------------------------------------------|------|
| QHN73794 |                             | DVQQWGFSGNLSNHDLYCQVHGNAHVASCDAIMTRCLAVHECFVKRVDWSTIEYPIIGDE | 6227 |
| SP       | P0C6X7 R1AB_CVHSA           | DVQQWGFSGNLSNHDQHCQVHGNAHVASCDAIMTRCLAVHECFVKRVDWSEYPIIGDE   | 6204 |
| TR       | Q6UZF5 Q6UZF5_CVHSA         | DVQQWGFSGNLSNHDQHCQVHGNAHVASCDAIMTRCLAVHECFVKRVDWSEYPIIGDE   | 6204 |
| TR       | Q6UZF1 Q6UZF1_CVHSA         | DVQQWGFSGNLSNHDQHCQVHGNAHVASCDAIMTRCLAVHECFVKRVDWSEYPIIGDE   | 6204 |
| TR       | Q6JH48 Q6JH48_CVHSA         | DVQQWGFSGNLSNHDQHCQVHGNAHVASCDAIMTRCLAVHECFVKRVDWSEYPIIGDE   | 6204 |
| TR       | Q692E6 Q692E6_CVHSA         | DVQQWGFSGNLSNHDQHCQVHGNAHVASCDAIMTRCLAVHECFVKRVDWSEYPIIGDE   | 6204 |
| TR       | A0A0K1YZY7 A0A0K1YZY7_CVHSA | DVQQWGFSGNLSNHDQHCQVHGNAHVASCDAIMTRCLAVHECFVKRVDWSEYPIIGDE   | 6204 |
| SP       | P0C6W2 R1AB_BCHK3           | DVQQWGFSGNLSNHDQHCQVHGNAHVASCDAIMTRCLAVHECFVKRVDWSEYPIIGDE   | 6198 |
| SP       | P0C6W6 R1AB_BCRP3           | DVQQWGFSGNLSNHDQHCQVHGNAHVASCDAIMTRCLAVHECFVKRVDWSEYPIIGDE   | 6202 |
| SP       | P0C6V9 R1AB_BC279           | DVQQWGFSGNLSNHDQHCQVHGNAHVASCDAIMTRCLAVHECFVKRVDWSEYPIIGDE   | 6210 |
| TR       | A0A0U1WHI4 A0A0U1WHI4_CVHSA | DVQQWGLTGNLSNHDQHCQVHGNAHVASCDAIMTRCLAVHECFVKRVDWSEYPIIGDE   | 6199 |
| TR       | A0A0U1WHG0 A0A0U1WHG0_CVHSA | DVQQWGFSGNLSNHDQHCQVHGNAHVASCDAIMTRCLAVHECFVKRVDWSEYPIIGDE   | 6199 |
| TR       | A0A166ZL34 A0A166ZL34_9NIDO | DVQQWGFSGNLSNHDQHCQVHGNAHVASCDAIMTRCLAVHECFVKRVDWSEYPIIGDE   | 6006 |
| TR       | R9QTB2 R9QTB2_CVHSA         | -----                                                        |      |
| TR       | R9QTH2 R9QTH2_CVHSA         | -----                                                        |      |
| SP       | P0C6U8 R1A_CVHSA            | -----                                                        |      |
| TR       | Q6JH47 Q6JH47_CVHSA         | -----                                                        |      |
| TR       | Q692E5 Q692E5_CVHSA         | -----                                                        |      |
| SP       | P0C6F8 R1A_BCHK3            | -----                                                        |      |
| TR       | A0A0K1Z0N1 A0A0K1Z0N1_CVHSA | -----                                                        |      |
| SP       | P0C6F5 R1A_BC279            | -----                                                        |      |
| SP       | P0C6T7 R1A_BCRP3            | -----                                                        |      |



|          |            |                  |                                                                |      |
|----------|------------|------------------|----------------------------------------------------------------|------|
| QHN73794 |            |                  | LKINAACRKVQHMVVKSAALLADKFPVLHDIGNPKAIKCVPPQADVEWKFYDAQPCSDKAYK | 6287 |
| SP       | P0C6X7     | R1AB_CVHSA       | LRVNSACRKVQHMVVKSAALLADKFPVLHDIGNPKAIKCVPPQAEVEWKFYDAQPCSDKAYK | 6264 |
| TR       | Q6UZF5     | Q6UZF5_CVHSA     | LRVNSACRKVQHMVVKSAALLADKFPVLHDIGNPKAIKCVPPQAEVEWKFYDAQPCSDKAYK | 6264 |
| TR       | Q6UZF1     | Q6UZF1_CVHSA     | LRVNSACRKVQHMVVKSAALLADKFPVLHDIGNPKAIKCVPPQAEVEWKFYDAQPCSDKAYK | 6264 |
| TR       | Q6JH48     | Q6JH48_CVHSA     | LRVNSACRKVQHMVVKSAALLADKFPVLHDIGNPKAIKCVPPQAEVEWKFYDAQPCSDKAYK | 6264 |
| TR       | Q692E6     | Q692E6_CVHSA     | LRVNSACRKVQHMVVKSAALLADKFPVLHDIGNPKAIKCVPPQAEVEWKFYDAQPCSDKAYK | 6264 |
| TR       | A0A0K1YZY7 | A0A0K1YZY7_CVHSA | LKINSACRKVQHMVVKSAALLADKFPVLHDIGNPKAIKCVPPQAEVEWKFYDAQPCSDKAYK | 6264 |
| SP       | P0C6W2     | R1AB_BCHK3       | LKINAACRKVQHMVVKSAALLADKFTVLHDIGNPKAIKCVPPQAEVDWKFYDAQPCSDKAYK | 6258 |
| SP       | P0C6W6     | R1AB_BCRP3       | LKINSACRKVQHMVVKSAALLADKFPVLHDIGNPKAIKCVPPQAEVEWKFYDAQPCSDKAYK | 6262 |
| SP       | P0C6V9     | R1AB_BC279       | LKINAACRKVQHMVVKSAALLADKFSVLHDIGNPKAIKCVPPQAEVDWKFYDAQPCSDKAYK | 6270 |
| TR       | A0A0U1WHI4 | A0A0U1WHI4_CVHSA | LKINAACRKVQHMVVKSAALLADKFPVLHDIGNPKAIKCVPPQADVEWKFYDAQPCSDKAYK | 6259 |
| TR       | A0A0U1WHG0 | A0A0U1WHG0_CVHSA | LKINAACRKVQHMVVKSAALLADKFPVLHDIGNPKAIKCVPPQADVEWKFYDVQPCSDKAYK | 6259 |
| TR       | A0A166ZL34 | A0A166ZL34_9NIDO | LKINAACRKVQHMVVKSAALLADKFPVLHDIGNPKAIKCVPPQADVEWKFYDVQPCSDKAYK | 6066 |
| TR       | R9QTB2     | R9QTB2_CVHSA     | -----                                                          |      |
| TR       | R9QTH2     | R9QTH2_CVHSA     | -----                                                          |      |
| SP       | P0C6U8     | R1A_CVHSA        | -----                                                          |      |
| TR       | Q6JH47     | Q6JH47_CVHSA     | -----                                                          |      |
| TR       | Q692E5     | Q692E5_CVHSA     | -----                                                          |      |
| SP       | P0C6F8     | R1A_BCHK3        | -----                                                          |      |
| TR       | A0A0K1Z0N1 | A0A0K1Z0N1_CVHSA | -----                                                          |      |
| SP       | P0C6F5     | R1A_BC279        | -----                                                          |      |
| SP       | P0C6T7     | R1A_BCRP3        | -----                                                          |      |



|          |            |                  |                                                                |      |
|----------|------------|------------------|----------------------------------------------------------------|------|
| QHN73794 |            |                  | IEELFYSYATHSDKFTDGVCLFWNCNVD RYPANAIVCRFDTRVLSNLNLP GCDGGSLYVN | 6347 |
| SP       | P0C6X7     | R1AB_CVHSA       | IEELFYSYATHHDKFTDGVCLFWNCNVD RYPANAIVCRFDTRVLSNLNLP GCDGGSLYVN | 6324 |
| TR       | Q6UZF5     | Q6UZF5_CVHSA     | IEELFYSYATHHDKFTDGVCLFWNCNVD RYPANAIVCRFDTRVLSNLNLP GCDGGSLYVN | 6324 |
| TR       | Q6UZF1     | Q6UZF1_CVHSA     | IEELFYSYATHHDKFTDGVCLFWNCNVD RYPANAIVCRFDTRVLSNLNLP GCDGGSLYVN | 6324 |
| TR       | Q6JH48     | Q6JH48_CVHSA     | IEELFYSYATHHDKFTDGVCLFWNCNVD RYPANAIVCRFDTRVLSNLNLP GCDGGSLYVN | 6324 |
| TR       | Q692E6     | Q692E6_CVHSA     | IEELFYSYATHHDKFTDGVCLFWNCNVD RYPANAIVCRFDTRVLSNLNLP GCDGGSLYVN | 6324 |
| TR       | A0A0K1YZY7 | A0A0K1YZY7_CVHSA | IEELFYSYATHHDKFTDGVCLFWNCNVD RYPANAIVCRFDTRVLSNLNLP GCDGGSLYVN | 6324 |
| SP       | P0C6W2     | R1AB_BCHK3       | IEELFYSYATHHDKFTDGVCLFWNCNVD RYPANAIVCRFDTRVLSNLNLP GCDGGSLYVN | 6318 |
| SP       | P0C6W6     | R1AB_BCRP3       | IEELFYSYATHHDKFTDGVCLFWNCNVD RYPANAIVCRFDTRVLSNLNLP GCDGGSLYVN | 6322 |
| SP       | P0C6V9     | R1AB_BC279       | IEELFYSYATHHDKFTDGVCLFWNCNVD RYPANAIVCRFDTRVLSNLNLP GCDGGSLYVN | 6330 |
| TR       | A0A0U1WHI4 | A0A0U1WHI4_CVHSA | IEELFYSYATHHDKFTDGVCLFWNCNVD RYPANAIVCRFDTRVLSNLNLP GCDGGSLYVN | 6319 |
| TR       | A0A0U1WHG0 | A0A0U1WHG0_CVHSA | IEELFYSYATHHDKFTDGVCLFWNCNVD RYPANAIVCRFDTRVLSNLNLP GCDGGSLYVN | 6319 |
| TR       | A0A166ZL34 | A0A166ZL34_9NIDO | IEELFYSYATHHDKFTDGVCLFWNCNVD RYPANAIVCRFDTRVLSNLNLP GCDGGSLYVN | 6126 |
| TR       | R9QTB2     | R9QTB2_CVHSA     | -----                                                          |      |
| TR       | R9QTH2     | R9QTH2_CVHSA     | -----                                                          |      |
| SP       | P0C6U8     | R1A_CVHSA        | -----                                                          |      |
| TR       | Q6JH47     | Q6JH47_CVHSA     | -----                                                          |      |
| TR       | Q692E5     | Q692E5_CVHSA     | -----                                                          |      |
| SP       | P0C6F8     | R1A_BCHK3        | -----                                                          |      |
| TR       | A0A0K1Z0N1 | A0A0K1Z0N1_CVHSA | -----                                                          |      |
| SP       | P0C6F5     | R1A_BC279        | -----                                                          |      |
| SP       | P0C6T7     | R1A_BCRP3        | -----                                                          |      |



|          |            |                  |                                                                 |      |
|----------|------------|------------------|-----------------------------------------------------------------|------|
| QHN73794 |            |                  | KHAFHTPAFDKSAFVN LKQLPFFYYSDSPCESHGKQVVS D IDYVPLKSATCITRCNLGGA | 6407 |
| SP       | P0C6X7     | R1AB_CVHSA       | KHAFHTPAFDKSAFTNLKQLPFFYYSDSPCESHGKQVVS D IDYVPLKSATCITRCNLGGA  | 6384 |
| TR       | Q6UZF5     | Q6UZF5_CVHSA     | KHAFHTPAFDKSAFTNLKQLPFFYYSDSPCESHGKQVVS D IDYVPLKSATCITRCNLGGA  | 6384 |
| TR       | Q6UZF1     | Q6UZF1_CVHSA     | KHAFHTPAFDKSAFTNLKQLPFFYYSDSPCESHGKQVVS D IDYVPLKSATCITRCNLGGA  | 6384 |
| TR       | Q6JH48     | Q6JH48_CVHSA     | KHAFHTPAFDKSAFTNLKQLPFFYYSDSPCESHGKQVVS D IDYVPLKSATCITRCNLGGA  | 6384 |
| TR       | Q692E6     | Q692E6_CVHSA     | KHAFHTPAFDKSAFTNLKQLPFFYYSDSPCESHGKQVVS D IDYVPLKSATCITRCNLGGA  | 6384 |
| TR       | A0A0K1YZY7 | A0A0K1YZY7_CVHSA | KHAFHTPAFDKSAFTNLKQLPFFYYSDSPCESHGKQVVS D IDYVPLKSATCITRCNLGGA  | 6384 |
| SP       | P0C6W2     | R1AB_BCHK3       | KHAFHTPAFDKSAFTHLKQLPFFYYSDSPCESHGKQVVS D IDYVPLKSATCITRCNLGGA  | 6378 |
| SP       | P0C6W6     | R1AB_BCRP3       | KHAFHTPAFDKSAFTNLKQLPFFYYSDSPCESHGKQVVS D IDYVPLKSATCITRCNLGGA  | 6382 |
| SP       | P0C6V9     | R1AB_BC279       | KHAFHTPAFDKSAFTYLKQLPFFYYSDSPCESHGKQVVS D IDYVPLKSATCITRCNLGGA  | 6390 |
| TR       | A0A0U1WHI4 | A0A0U1WHI4_CVHSA | KHAFHTPAFDKSAFSLNKQLPFFYYSDSPCESHGKQVVS D IDYVPLKSATCITRCNLGGA  | 6379 |
| TR       | A0A0U1WHG0 | A0A0U1WHG0_CVHSA | KHAFHTPAFDKSAFTHLKQLPFFYYSDSPCESHGKQVVS D IDYVPLKSATCITRCNLGGA  | 6379 |
| TR       | A0A166ZL34 | A0A166ZL34_9NIDO | KHAFYTPAFDKSAFTHLKQLPFFYYSDSPCESHGKQVVS D IDYVPLKSATCITRCNLGGA  | 6186 |
| TR       | R9QTB2     | R9QTB2_CVHSA     | -----                                                           |      |
| TR       | R9QTH2     | R9QTH2_CVHSA     | -----                                                           |      |
| SP       | P0C6U8     | R1A_CVHSA        | -----                                                           |      |
| TR       | Q6JH47     | Q6JH47_CVHSA     | -----                                                           |      |
| TR       | Q692E5     | Q692E5_CVHSA     | -----                                                           |      |
| SP       | P0C6F8     | R1A_BCHK3        | -----                                                           |      |
| TR       | A0A0K1Z0N1 | A0A0K1Z0N1_CVHSA | -----                                                           |      |
| SP       | P0C6F5     | R1A_BC279        | -----                                                           |      |
| SP       | P0C6T7     | R1A_BCRP3        | -----                                                           |      |

QHN73794  
SP P0C6X7|R1AB\_CVHSA VCRHHANEYRQYLDAYNMMISAGFSLWVYKQFDTYNLWNTFTRLQSLENVAFNVVNKGHF 6467  
TR Q6UZF5|Q6UZF5\_CVHSA VCRHHANEYRQYLDAYNMMISAGFSLWIYKQFDTYNLWNTFTRLQSLENVAYNVVNKGHF 6444  
TR Q6UZF1|Q6UZF1\_CVHSA VCRHHANEYRQYLDAYNMMISAGFSLWIYKQFDTYNLWNTFTRLQSLENVAYNVVNKGHF 6444  
TR Q6JH48|Q6JH48\_CVHSA VCRHHANEYRQYLDAYNMMISAGFSLWYKQFDTYNLWNTFTRLQSLENVAYNVVNKGHF 6444  
TR Q692E6|Q692E6\_CVHSA VCRHHANEYRQYLDAYNMMISAGFSLWIYKQFDTYNLWNTFTRLQSLENVAYNVVNKGHF 6444  
TR A0A0K1YZY7|A0A0K1YZY7\_CVHSA VCRHHANEYRQYLDAYNMMISAGFSLWIYKQFDTYNLWNTFTRLQSLENVAYNVVNKGHF 6444  
SP P0C6W2|R1AB\_BCHK3 VCRHHANEYRQYLDAYNMMISAGFSLWIYKQFDTYNLWNTFTRLQSLENVAYNVVNKGHF 6438  
SP P0C6W6|R1AB\_BCRP3 VCRHHANEYRQYLDAYNMMISAGFSLWIYKQFDTYNLWNTFTRLQSLENVAYNVVNKGHF 6442  
SP P0C6V9|R1AB\_BC279 VCRHHANEYRQYLDAYNMMISAGFSLWIYKQFDTYNLWNTFTRLQSLENVAYNVVNKGHF 6450  
TR A0A0U1WHI4|A0A0U1WHI4\_CVHSA VCRHHANEYRQYLDAYNMMISAGFSLWIYKQFDTYNLWNTFTRLQSLENVAYNVVNKGHF 6439  
TR A0A0U1WHG0|A0A0U1WHG0\_CVHSA VCRHHANEYRQYLDAYNMMISAGFSLWIYKQFDTYNLWNTFTRLQSLENVAYNVVNKGHF 6439  
TR A0A166ZL34|A0A166ZL34\_9NIDO VCRHHANEYRQYLDAYNMMISAGFSLWIYKQFDTYNLWNTFTRLQSLENVAYNVVNKGHF 6246  
TR R9QTB2|R9QTB2\_CVHSA -----  
TR R9QTH2|R9QTH2\_CVHSA -----  
SP P0C6U8|R1A\_CVHSA -----  
TR Q6JH47|Q6JH47\_CVHSA -----  
TR Q692E5|Q692E5\_CVHSA -----  
SP P0C6F8|R1A\_BCHK3 -----  
TR A0A0K1Z0N1|A0A0K1Z0N1\_CVHSA -----  
SP P0C6F5|R1A\_BC279 -----  
SP P0C6T7|R1A\_BCRP3 -----
