# Supplementary material for: Structural Genomics of SARS-CoV-2 Indicates Evolutionary Conserved Functional Regions of Viral Proteins
Source: MDPI journal article supplement (doi:10.3390/v12040360), 2020-03-25
Supplement: s1 [file s1]

**Supplementary File 7. Ligand binding sites mapped on the sequence of wNsp16 protein aligned with the closest homologs found in UniProt.**

Ligand BS:

-  S-ADENOSYLMETHIONINE (5YN6-SAM, MERS)
-  S-ADENOSYL-L-HOMOCYSTEINE (5YN8-SAH, MERS)
-  SINEFUNGIN (5YNB-SFG, MERS)
-  P1-7-METHYLGUANOSINE-P3-ADENOSINE-5',5'-TRIPHOSPHATE (5YNF-GTA, MERS)
-  7-METHYL-GUANOSINE-5'-TRIPHOSPHATE-5'-GUANOSINE (5YNI-GTG, MERS)

|          |                               |                                                               |      |
|----------|-------------------------------|---------------------------------------------------------------|------|
| QHN73794 |                               | KVVKVTIDYTEISFMLWCKDGHVETTFYPKLQSSQAWQPGVAMPNLYKMQRMLLEKCDLQN | 6827 |
| SP       | P0C6X7   R1AB_CVHSA           | KVVKVTIDYAEISFMLWCKDGHVETTFYPKLQASQAWQPGVAMPNLYKMQRMLLEKCDLQN | 6804 |
| TR       | Q6UZF5   Q6UZF5_CVHSA         | KVVKVTIDYAEISFMLWCKDGHVETTFYPKLQASQAWQPGVAMPNLYKMQRMLLEKCDLQN | 6804 |
| TR       | Q6UZF1   Q6UZF1_CVHSA         | KVVKVTIDYAEISFMLWCKDGHVETTFYPKLQASQAWQPGVAMPNLYKMQRMLLEKCDLQN | 6804 |
| TR       | Q6JH48   Q6JH48_CVHSA         | KVVKVTIDYAEISFMLWCKDGHVETTFYPKLQASQAWQPGVAMPNLYKMQRMLLEKCDLQN | 6804 |
| TR       | Q692E6   Q692E6_CVHSA         | KVVKVTIDYAEISFMLWCKDGHVETTFYPKLQASQAWQPGVAMPNLYKMQRMLLEKCDLQN | 6804 |
| TR       | A0A0K1YZY7   A0A0K1YZY7_CVHSA | KVVKVTIDYVEISFMLWCKDGHVETTFYPKLQASQAWQPGVAMPNLYKMQRMLLEKCDLQN | 6804 |
| SP       | P0C6W2   R1AB_BCHK3           | KVVKVTIDYAEISFMLWCKDGHVETTFYPKLQASQAWQPGVAMPNLYKMQRMLLEKCDLQN | 6798 |
| SP       | P0C6W6   R1AB_BCRP3           | KVVKVTIDYAEISFMLWCKDGHVETTFYPKLQASQAWQPGVAMPNLYKMQRMLLEKCDLQN | 6802 |
| SP       | P0C6V9   R1AB_BC279           | KVVKVTIDYAEISFMLWCKDGHVETTFYPKLQASQAWQPGVAMPNLYKMQRMLLEKCDLQN | 6810 |
| TR       | A0A0U1WHI4   A0A0U1WHI4_CVHSA | KVVKVTIDYAEISFMLWCKDGHVETTFYPKLQASQAWQPGVAMPNLYKMQRMLLEKCDLQN | 6799 |
| TR       | A0A0U1WHG0   A0A0U1WHG0_CVHSA | KVVKVTIDYAEISFMLWCKDGYVETTFYPKLQASQAWQPGVAMPNLYKMQRMLLEKCDLQN | 6799 |
| TR       | A0A166ZL34   A0A166ZL34_9NIDO | KVVKVTIDYAEISFMLWCKDGYVETTFYPKLQASQAWQPGVAMPNLYKMQRMLLEKCDLQN | 6606 |
| TR       | R9QTB2   R9QTB2_CVHSA         | -----                                                         |      |
| TR       | R9QTH2   R9QTH2_CVHSA         | -----                                                         |      |
| SP       | P0C6U8   R1A_CVHSA            | -----                                                         |      |
| TR       | Q6JH47   Q6JH47_CVHSA         | -----                                                         |      |
| TR       | Q692E5   Q692E5_CVHSA         | -----                                                         |      |
| SP       | P0C6F8   R1A_BCHK3            | -----                                                         |      |
| TR       | A0A0K1Z0N1   A0A0K1Z0N1_CVHSA | -----                                                         |      |
| SP       | P0C6F5   R1A_BC279            | -----                                                         |      |
| SP       | P0C6T7   R1A_BCRP3            | -----                                                         |      |

|          |                               |                                                              |      |
|----------|-------------------------------|--------------------------------------------------------------|------|
| QHN73794 |                               | YGDSATLPKGIMMNVAKYTQLCQYLNLTTLAVPYNMRVIHFGAGSDKGVPAGTAVLRQWL | 6887 |
| SP       | P0C6X7   R1AB_CVHSA           | YGENAVIPKGIMMNVAKYTQLCQYLNLTTLAVPYNMRVIHFGAGSDKGVPAGTAVLRQWL | 6864 |
| TR       | Q6UZF5   Q6UZF5_CVHSA         | YGENAVIPKGIMMNVAKYTQLCQYLNLTTLAVPYNMRVIHFGAGSDKGVPAGTAVLRQWL | 6864 |
| TR       | Q6UZF1   Q6UZF1_CVHSA         | YGENAVIPKGIMMNVAKYTQLCQYLNLTTLAVPYNMRVIHFGAGSDKGVPAGTAVLRQWL | 6864 |
| TR       | Q6JH48   Q6JH48_CVHSA         | YGENAVIPKGIMMNVAKYTQLCQYLNLTTLAVPYNMRVIHFGAGSDKGVPAGTAVLRQWL | 6864 |
| TR       | Q692E6   Q692E6_CVHSA         | YGENAVIPKGIMMNVAKYTQLCQYLNLTTLAVPYNMRVIHFGAGSDKGVPAGTAVLRQWL | 6864 |
| TR       | A0A0K1YZY7   A0A0K1YZY7_CVHSA | YGENAVIPKGIMMNVAKYTQLCQYLNLTTLAVPYNMRVIHFGAGSDKGVPAGTAVLRQWL | 6864 |
| SP       | P0C6W2   R1AB_BCHK3           | YGENAVIPKGIMMNVAKYTQLCQYLNLTTLAVPYNMRVIHFGAGSDKGVPAGTAVLRQWL | 6858 |
| SP       | P0C6W6   R1AB_BCRP3           | YGENAVIPKGIMMNVAKYTQLCQYLNLTTLAVPYNMRVIHFGAGSDKGVPAGTAVLRQWL | 6862 |
| SP       | P0C6V9   R1AB_BC279           | YGENAVIPKGIMMNVAKYTQLCQYLNLTTLAVPYNMRVIHFGAGSDKGVPAGTAVLRQWL | 6870 |
| TR       | A0A0U1WHI4   A0A0U1WHI4_CVHSA | YGENAVIPKGIMMNVAKYTQLCQYLNLTTLAVPYNMRVIHFGAGSDKGVPAGTAVLRQWL | 6859 |
| TR       | A0A0U1WHG0   A0A0U1WHG0_CVHSA | YGENAVIPKGIMMNVAKYTQLCQYLNLTTLAVPYNMRVIHFGAGSDKGVPAGTAVLRQWL | 6859 |
| TR       | A0A166ZL34   A0A166ZL34_9NIDO | YGENAVIPKGIMMNVAKYTQLCQYLNLTTLAVPYNMRVIHFGAGSDKGVPAGTAVLRQWL | 6666 |
| TR       | R9QTB2   R9QTB2_CVHSA         | -----                                                        |      |
| TR       | R9QTH2   R9QTH2_CVHSA         | -----                                                        |      |
| SP       | P0C6U8   R1A_CVHSA            | -----                                                        |      |
| TR       | Q6JH47   Q6JH47_CVHSA         | -----                                                        |      |
| TR       | Q692E5   Q692E5_CVHSA         | -----                                                        |      |
| SP       | P0C6F8   R1A_BCHK3            | -----                                                        |      |
| TR       | A0A0K1Z0N1   A0A0K1Z0N1_CVHSA | -----                                                        |      |
| SP       | P0C6F5   R1A_BC279            | -----                                                        |      |
| SP       | P0C6T7   R1A_BCRP3            | -----                                                        |      |

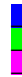

| QHN73794 |            |                  | NYLGKPREQIDGYVMHANYIFWRNTNPIQLSSYSFLDMSKFPLKLRGTAVMSLKEGQIND  | 7067 |
|----------|------------|------------------|---------------------------------------------------------------|------|
| SP       | P0C6X7     | R1AB_CVHSA       | NYLGKPKREQIDGYTMHANYIFWRNTNPIQLSSYSFLDMSKFPLKLRGTAVMSLKENQIND | 7044 |
| TR       | Q6UZF5     | Q6UZF5_CVHSA     | NYLGKPKREQIDGYTMHANYIFWRNTNPIQLSSYSFLDMSKFPLKLRGTAVMSLKENQIND | 7044 |
| TR       | Q6UZF1     | Q6UZF1_CVHSA     | NYLGKPKREQIDGYTMHANYIFWRNTNPIQLSSYSFLDMSKFPLKLRGTAVMSLKENQIND | 7044 |
| TR       | Q6JH48     | Q6JH48_CVHSA     | NYLGKPKREQIDGYTMHANYIFWRNTNPIQLSSYSFLDMSKFPLKLRGTAVMSLKENQIND | 7044 |
| TR       | Q692E6     | Q692E6_CVHSA     | NYLGKPKREQIDGYTMHANYIFWRNTNPIQLSSYSFLDMSKFPLKLRGTAVMSLKENQIND | 7044 |
| TR       | A0A0K1ZY7  | A0A0K1ZY7_CVHSA  | NYLGKPKREQIDGYTMHANYIFWRNTNPIQLSSYSFLDMSKFPLKLRGTAVMFLKENQIND | 7044 |
| SP       | P0C6W2     | R1AB_BCHK3       | NYLGKPKREQIDGYTMHANYIFWRNTNPIQLSSYSFLDMSKFPLKLRGTAVMSLKENQIND | 7038 |
| SP       | P0C6W6     | R1AB_BCRP3       | NYLGKPKREQIDGYTMHANYIFWRNTNPIQLSSYSFLDMSKFPLKLRGTAVMSLKENQIND | 7042 |
| SP       | P0C6V9     | R1AB_BC279       | NYLGKPREQIDGYTMHANYIFWRNTNPIQLSSYSFLDMSKFPLKLRGTAVMSLKENQIND  | 7050 |
| TR       | A0A0U1WHI4 | A0A0U1WHI4_CVHSA | NYLGKPKREQIDGYTMHANYVFWRNTNPIQLSSYSFLDMSKFPLKLRGTAVMSLKENQIND | 7039 |
| TR       | A0A0U1WHG0 | A0A0U1WHG0_CVHSA | NYLGKPKREQIDGYTMHANYIFWRNTNPIQLSSYSFLDMSKFPLKLRGTAVMSLKENQIND | 7039 |
| TR       | A0A166ZL34 | A0A166ZL34_9NIDO | NYLGKPKREQIDGYTMHANYIFWRNTNPIQLSSYSFLDMSKFPLKLRGTAVMSLKENQIND | 6846 |
| TR       | R9QTB2     | R9QTB2_CVHSA     | -----                                                         |      |
| TR       | R9QTH2     | R9QTH2_CVHSA     | -----                                                         |      |
| SP       | P0C6U8     | R1A_CVHSA        | -----                                                         |      |
| TR       | Q6JH47     | Q6JH47_CVHSA     | -----                                                         |      |
| TR       | Q692E5     | Q692E5_CVHSA     | -----                                                         |      |
| SP       | P0C6F8     | R1A_BCHK3        | -----                                                         |      |
| TR       | A0A0K1Z0N1 | A0A0K1Z0N1_CVHSA | -----                                                         |      |
| SP       | P0C6F5     | R1A_BC279        | -----                                                         |      |
| SP       | P0C6T7     | R1AB_BCRP3       | -----                                                         |      |

|          |                             |                                 |      |
|----------|-----------------------------|---------------------------------|------|
| QHN73794 |                             | MILSLLEKGRLLIIRENNRVVVISSDVLVNN | 7096 |
| SP       | P0C6X7 R1AB_CVHSA           | MIYSLLEKGRLLIIRENNRVVSSDILVNN   | 7073 |
| TR       | Q6UZF5 Q6UZF5_CVHSA         | MIYSLLEKGRLLIIRENNRVVSSDILVNN   | 7073 |
| TR       | Q6UZF1 Q6UZF1_CVHSA         | MIYSLLEKGRLLIIRENNRVVSSDILVNN   | 7073 |
| TR       | Q6JH48 Q6JH48_CVHSA         | MIYSLLEKGRLLIIRENNRVVSSDILVNN   | 7073 |
| TR       | Q692E6 Q692E6_CVHSA         | MIYSLLEKGRLLIIRENNRVVSSDILVNN   | 7073 |
| TR       | A0A0K1YZY7 A0A0K1YZY7_CVHSA | MIYSLLEKGRLLIIRENNTVVVSSDVLVNH  | 7073 |
| SP       | P0C6W2 R1AB_BCHK3           | MIYSLLEKGRLLIIRENNRVVSSDILVNN   | 7067 |
| SP       | P0C6W6 R1AB_BCRP3           | MIYSLLEKGRLLIIRENNRVVSSDILVNN   | 7071 |
| SP       | P0C6V9 R1AB_BC279           | MIYSLLENGRLLIIRENNRVVSSDILVNN   | 7079 |
| TR       | A0A0U1WHI4 A0A0U1WHI4_CVHSA | MIYSLLEKGRLLIIRENNTVVVSSDVLVNH  | 7068 |
| TR       | A0A0U1WHG0 A0A0U1WHG0_CVHSA | MIYSLLEKGRLLIVRENNRVIVSSDVLVNN  | 7068 |
| TR       | A0A166ZL34 A0A166ZL34_9NIDO | MIYSLLEKGRLLIVRENNRVIVSSDVLVNN  | 6875 |
| TR       | R9QTB2 R9QTB2_CVHSA         | -----                           |      |
| TR       | R9QTH2 R9QTH2_CVHSA         | -----                           |      |
| SP       | P0C6U8 R1A_CVHSA            | -----                           |      |
| TR       | Q6JH47 Q6JH47_CVHSA         | -----                           |      |
| TR       | Q692E5 Q692E5_CVHSA         | -----                           |      |
| SP       | P0C6F8 R1A_BCHK3            | -----                           |      |
| TR       | A0A0K1Z0N1 A0A0K1Z0N1_CVHSA | -----                           |      |
| SP       | P0C6F5 R1A_BC279            | -----                           |      |
| SP       | P0C6T7 R1A_BCRP3            | -----                           |      |
