# Supplementary material for: Structural Genomics of SARS-CoV-2 Indicates Evolutionary Conserved Functional Regions of Viral Proteins
Source: MDPI journal article supplement (doi:10.3390/v12040360), 2020-03-25
Supplement: s1 [file s1]

**Supplementary File 4. Ligand binding sites extracted from SARS protein targets and mapped on the sequence of wNsp5 protein aligned with the closest homologs found in UniProt. Shown is the first group of ligands.**

Ligand BS:

 benzyl (2-oxopropyl)carbamate (3D62-959, SARS)

 N-[(1R)-2-(tert-butylamino)-2-oxo-1-(pyridin-3-yl)ethyl]-N-(4-tert-butylphenyl)furan-2-carboxamide (3V3M-0EN, SARS)

 N-[4-(acetylamino)phenyl]-2-(1H-benzotriazol-1-yl)-N-[(1R)-2-[(2-methylbutan-2-yl)amino]-1-(1-methyl-1H-pyrrol-2-yl)-2-oxoethyl]acetamide (4MDS-23H, SARS)

 (2S)-2-([[(3S,4aR,8aS)-2-(4-bromobenzoyl)decahydroisoquinolin-3-yl]methyl]amino)-3-(1H-imidazol-5-yl)propanal (4TWW-3A7, SARS)

 (2S)-2-([[(3S,4aR,8aS)-2-(biphenyl-4-ylcarbonyl)decahydroisoquinolin-3-yl]methyl]amino)-3-(1H-imidazol-5-yl)propanal (4TWY-3BL, SARS)

 (2S)-2-([[(3R,4aS,8aR)-2-(biphenyl-4-ylcarbonyl)decahydroisoquinolin-3-yl]methyl]amino)-3-(1H-imidazol-5-yl)propanal (4WY3-3X5, SARS)

 N-(3-FUROYL)-D-VALYL-L-VALYL-N~1~-((1R,2Z)-4-ETHOXY-4-OXO-1-[(3S)-2-OXOPYRROLIDIN-3-YL]METHYL)BUT-2-ENYL)-D-LEUCINAMIDE (2AMD-9IN, SARS)

 (5S,8S,14R)-ETHYL 11-(3-AMINO-3-OXOPROPYL)-8-BENZYL-14-HYDROXY-5-ISOBUTYL-3,6,9,12-TETRAOXO-1-PHENYL-2-OXA-4,7,10,11-TETRAAZAPENTADECAN-15-OATE (2A5K-AZP, SARS)

 N-((3S,6R)-6-((S,E)-4-ETHOXYCARBONYL-1-((S)-2-OXOPYRROLIDIN-3-YL)BUT-3-EN-2-YLCARBAMOYL)-2,9-DIMETHYL-4-OXODEC-8-EN-3-YL)-5-METHYLISOXAZOLE-3-CARBOXAMIDE (2ALV-CY6, SARS)

 ETHYL (4R)-4-([[(2R,5S)-5-{N-(TERT-BUTOXYCARBONYL)-L-SERYL}AMINO]-6-METHYL-2-(3-METHYLBUT-2-EN-1-YL)-4-OXOHEPTANOYL]AMINO)-5-[(3R)-2-OXOPYRROLIDIN-3-YL]PENTANOATE (2QIQ-CYV, SARS)

 ETHYL (2E,4S)-4-([[(2R)-2-{N-(TERT-BUTOXYCARBONYL)-L-VALYL}AMINO]-2-PHENYLETHANOYL)AMINO)-5-[(3S)-2-OXOPYRROLIDIN-3-YL]PENT-2-ENOATE (2D2D-ENB, SARS)

 ETHYL (4R)-4-([N-[(BENZYLOXY)CARBONYL]-L-PHENYLALANYL]AMINO)-5-[(3S)-2-OXOPYRROLIDIN-3-YL]PENTANOATE (3SZN-G75, SARS)

 ETHYL (4R)-4-([N-(TERT-BUTOXYCARBONYL)-L-PHENYLALANYL]AMINO)-5-[(3S)-2-OXOPYRROLIDIN-3-YL]PENTANOATE (3TIT-G81, SARS)

|                                |                                                               |      |
|--------------------------------|---------------------------------------------------------------|------|
| QHN73794                       | EAACCHLAKALNDFSNSGSDVLYQPPQTSITSAVLQSGFRKMAFPSPGKVEGCMVQVTCGT | 3287 |
| SP P0C6X7 R1AB_CVHSA           | EAACCHLAKALNDFSNSGADVLYQPPQTSITSAVLQSGFRKMAFPSPGKVEGCMVQVTCGT | 3264 |
| TR Q6UZF5 Q6UZF5_CVHSA         | EAACCHLAKALNDFSNSGADVLYQPPQTSITSAVLQSGFRKMAFPSPGKVEGCMVQVTCGT | 3264 |
| TR Q6UZF1 Q6UZF1_CVHSA         | EAACCHLAKALNDFSNSGADVLYQPPQTSITSAVLQSGFRKMAFPSPGKVEGCMVQVTCGT | 3264 |
| TR Q6JH48 Q6JH48_CVHSA         | EAACCHLAKALNDFSNSGADVLYQPPQTSITSAVLQSGFRKMAFPSPGKVEGCMVQVTCGT | 3264 |
| TR Q692E6 Q692E6_CVHSA         | EAACCHLAKALNDFSNSGADVLYQPPQTSITSAVLQSGFRKMAFPSPGKVEGCMVQVTCGT | 3264 |
| TR A0A0K1YZY7 A0A0K1YZY7_CVHSA | EAACCHLAKALNDFSNSGSDVLYQPPQTSITSAVLQSGFRKMAFPSPGKVEGCMVQVTCGT | 3264 |
| SP P0C6W2 R1AB_BCHK3           | EAACCHLAKALNDFSNSGADVLYQPPQTSITSAVLQSGFRKMAFPSPGKVEGCMVQVTCGT | 3258 |
| SP P0C6W6 R1AB_BCRP3           | EAACCHLAKALNDFSNSGADVLYQPPQTSITSAVLQSGFRKMAFPSPGKVEGCMVQVTCGT | 3262 |
| SP P0C6V9 R1AB_BC279           | EAACCHLAKALNDFSNSGADVLYQPPQTSITSAVLQSGFRKMAFPSPGKVEGCMVQVTCGT | 3270 |
| TR A0A0U1WHI4 A0A0U1WHI4_CVHSA | EAACCHLAKALNDFSNSGADVLYQPPQTSITSAVLQSGFRKMAFPSPGKVEGCMVQVTCGT | 3259 |
| TR A0A0U1WHG0 A0A0U1WHG0_CVHSA | EAACCHLAKALNDFSNSGADVLYQPPQTSITSAVLQSGFRKMAFPSPGKVEGCMVQVTCGT | 3259 |
| TR A0A166ZL34 A0A166ZL34_9NIDO | EAACCHLAKALNDFSNSGADVLYQPPQTSITSAVLQSGFRKMAFPSPGKVEGCMVQVTCGT | 3066 |
| TR R9QTB2 R9QTB2_CVHSA         | EAACCHLAKALNDFSNSGADVLYQPPQTSITSAVLQSGFRKMAFPSPGKVEGCMVQVTCGT | 3256 |
| TR R9QTH2 R9QTH2_CVHSA         | EAACCHLAKALNDFSNSGSDVLYQPPQTSITSAVLQSGFRKMAFPSPGKVEGCMVQVTCGT | 3265 |
| SP P0C6U8 R1A_CVHSA            | EAACCHLAKALNDFSNSGADVLYQPPQTSITSAVLQSGFRKMAFPSPGKVEGCMVQVTCGT | 3264 |
| TR Q6JH47 Q6JH47_CVHSA         | EAACCHLAKALNDFSNSGADVLYQPPQTSITSAVLQSGFRKMAFPSPGKVEGCMVQVTCGT | 3264 |
| TR Q692E5 Q692E5_CVHSA         | EAACCHLAKALNDFSNSGADVLYQPPQTSITSAVLQSGFRKMAFPSPGKVEGCMVQVTCGT | 3264 |
| SP P0C6F8 R1A_BCHK3            | EAACCHLAKALNDFSNSGADVLYQPPQTSITSAVLQSGFRKMAFPSPGKVEGCMVQVTCGT | 3258 |
| TR A0A0K1Z0N1 A0A0K1Z0N1_CVHSA | EAACCHLAKALNDFSNSGSDVLYQPPQTSITSAVLQSGFRKMAFPSPGKVEGCMVQVTCGT | 3264 |
| SP P0C6F5 R1A_BC279            | EAACCHLAKALNDFSNSGADVLYQPPQTSITSAVLQSGFRKMAFPSPGKVEGCMVQVTCGT | 3270 |
| SP P0C6T7 R1A_BCRP3            | EAACCHLAKALNDFSNSGADVLYQPPQTSITSAVLQSGFRKMAFPSPGKVEGCMVQVTCGT | 3262 |
|                                | *****:*****:*****                                             |      |

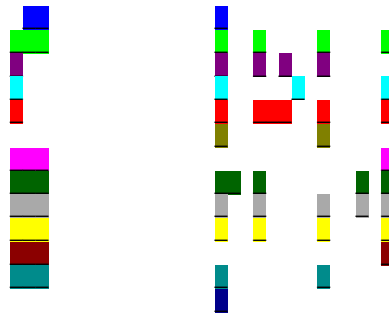

|                                             |                             |                                                              |      |
|---------------------------------------------|-----------------------------|--------------------------------------------------------------|------|
| QHN73794                                    |                             | TTLNGLWLDDTVYCPRHVICTAEDMLNPNYEDLLIRKSNHNFLVQAGNVQLRVIGHSMQN | 3347 |
| SP                                          | P0C6X7 R1AB_CVHSA           | TTLNGLWLDDTVYCPRHVICTAEDMLNPNYEDLLIRKSNHSLVQAGNVQLRVIGHSMQN  | 3324 |
| TR                                          | Q6UZF5 Q6UZF5_CVHSA         | TTLNGLWLDDTVYCPRHVICTAEDMLNPNYEDLLIRKSNHSLVQAGNVQLRVIGHSMQN  | 3324 |
| TR                                          | Q6UZF1 Q6UZF1_CVHSA         | TTLNGLWLDDTVYCPRHVICTAEDMLNPNYEDLLIRKSNHSLVQAGNVQLRVIGHSMQN  | 3324 |
| TR                                          | Q6JH48 Q6JH48_CVHSA         | TTLNGLWLDDTVYCPRHVICTAEDMLNPNYEDLLIRKANHSLVQAGNVQLRVIGHSMQN  | 3324 |
| TR                                          | Q692E6 Q692E6_CVHSA         | TTLNGLWLDDTVYCPRHVICTAEDMLNPNYEDLLIRKSNHSLVQAGNVQLRVIGHSMQN  | 3324 |
| TR                                          | A0A0K1YZY7 A0A0K1YZY7_CVHSA | TTLNGLWLDDTVYCPRHVICTAEDMLNPNYEDLLIRKSNHSLVQAGNVQLRVIGHSMQN  | 3324 |
| SP                                          | P0C6W2 R1AB_BCHK3           | TTLNGLWLDDTVYCPRHVVCTAEDMLNPNYDDLIRKSNHSLVQAGNVQLRVIGHSMQN   | 3318 |
| SP                                          | P0C6W6 R1AB_BCRP3           | TTLNGLWLDDTVYCPRHVICTAEDMLNPNYEDLLIRKSNHSLVQAGNVQLRVIGHSMQN  | 3322 |
| SP                                          | P0C6V9 R1AB_BC279           | TTLNGLWLDDTVYCPRHVICTAEDMLNPNYEDLLIRKSNHSLVQAGNVQLRVIGHSMQN  | 3330 |
| TR                                          | A0A0U1WHI4 A0A0U1WHI4_CVHSA | TTLNGLWLDDTVYCPRHVICTAEDMLNPNYEDLLIRKSNHSLVQAGNVQLRVIGHSMQN  | 3319 |
| TR                                          | A0A0U1WHG0 A0A0U1WHG0_CVHSA | TTLNGLWLDDTVYCPRHVVCTVEDMLNPNYEDLLIRKSNHSLVQAGNVQLRVIGHSMQN  | 3319 |
| TR                                          | A0A166ZL34 A0A166ZL34_9NIDO | TTLNGLWLDDTVYCPRHVVCTVEDMLNPNYEDLLIRKSNHSLVQAGNVQLRVIGHSMQN  | 3126 |
| TR                                          | R9QTB2 R9QTB2_CVHSA         | TTLNGLWLDDTVYCPRHVICTAEDMLNPNYEDLLIRKSNHSLVQAGNVQLRVIGHSMQN  | 3316 |
| TR                                          | R9QTH2 R9QTH2_CVHSA         | TTLNGLWLDDTVYCPRHVICTAEDMLNPNYEDLLIRKSNHSLVQAGNVQLRVIGHSMQN  | 3325 |
| SP                                          | P0C6U8 R1A_CVHSA            | TTLNGLWLDDTVYCPRHVICTAEDMLNPNYEDLLIRKSNHSLVQAGNVQLRVIGHSMQN  | 3324 |
| TR                                          | Q6JH47 Q6JH47_CVHSA         | TTLNGLWLDDTVYCPRHVICTAEDMLNPNYEDLLIRKANHSLVQAGNVQLRVIGHSMQN  | 3324 |
| TR                                          | Q692E5 Q692E5_CVHSA         | TTLNGLWLDDTVYCPRHVICTAEDMLNPNYEDLLIRKSNHSLVQAGNVQLRVIGHSMQN  | 3324 |
| SP                                          | P0C6F8 R1A_BCHK3            | TTLNGLWLDDTVYCPRHVVCTAEDMLNPNYDDLIRKSNHSLVQAGNVQLRVIGHSMQN   | 3318 |
| TR                                          | A0A0K1Z0N1 A0A0K1Z0N1_CVHSA | TTLNGLWLDDTVYCPRHVICTAEDMLNPNYEDLLIRKSNHSLVQAGNVQLRVIGHSMQN  | 3324 |
| SP                                          | P0C6F5 R1A_BC279            | TTLNGLWLDDTVYCPRHVICTAEDMLNPNYEDLLIRKSNHSLVQAGNVQLRVIGHSMQN  | 3330 |
| SP                                          | P0C6T7 R1A_BCRP3            | TTLNGLWLDDTVYCPRHVICTAEDMLNPNYEDLLIRKSNHSLVQAGNVQLRVIGHSMQN  | 3322 |
| *****:*****:*** *****:*****:***:*****:***** |                             |                                                              |      |

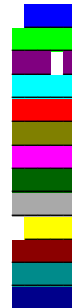

|                                               |                             |                                                               |      |
|-----------------------------------------------|-----------------------------|---------------------------------------------------------------|------|
| QHN73794                                      |                             | CVLKLKVDTSNPKTPKYKFVRIQPGQTFSSLVACYNGSPSGVYQCAMRPNHTIKGSFLNGS | 3407 |
| SP                                            | P0C6X7 R1AB_CVHSA           | CLLRLKVDTSNPKTPKYKFVRIQPGQTFSSLVACYNGSPSGVYQCAMRPNHTIKGSFLNGS | 3384 |
| TR                                            | Q6UZF5 Q6UZF5_CVHSA         | CLLRLKVDTSNPKTPKYKFVRIQPGQTFSSLVACYNGSPSGVYQCAMRPNHTIKGSFLNGS | 3384 |
| TR                                            | Q6UZF1 Q6UZF1_CVHSA         | CLLRLKVDTSNPKTPKYKFVRIQPGQTFSSLVACYNGSPSGVYQCAMRPNHTIKGSFLNGS | 3384 |
| TR                                            | Q6JH48 Q6JH48_CVHSA         | CLLRLKVDTSNPKTPKYKFVRIQPGQTFSSLVACYNGSPSGVYQCAMRPNHTIKGSFLNGS | 3384 |
| TR                                            | Q692E6 Q692E6_CVHSA         | CLLRLKVDTSNPKTPKYKFVRIQPGQTFSSLVACYNGSPSGVYQCAMRPNHTIKGSFLNGS | 3384 |
| TR                                            | A0A0K1YZY7 A0A0K1YZY7_CVHSA | CLLRLKVDTSNPKTPKYKFVRIQPGQTFSSLVACYNGSPSGVYQCAMRPNHTIKGSFLNGS | 3384 |
| SP                                            | P0C6W2 R1AB_BCHK3           | CLLRLKVDTSNPKTPKYKFVRIQPGQTFSSLVACYNGSPSGVYQCAMRPNHTIKGSFLNGS | 3378 |
| SP                                            | P0C6W6 R1AB_BCRP3           | CLLRLKVDTSNPKTPKYKFVRIQPGQTFSSLVACYNGSPSGVYQCAMRPNHTIKGSFLNGS | 3382 |
| SP                                            | P0C6V9 R1AB_BC279           | CLLRLKVDTSNPKTPKYKFVRIQPGQTFSSLVACYNGSPSGVYQCAMRPNHTIKGSFLNGS | 3390 |
| TR                                            | A0A0U1WHI4 A0A0U1WHI4_CVHSA | CLLRLKVDTSNPKTPKYKFVRIQPGQTFSSLVACYNGSPSGVYQCAMRPNHTIKGSFLNGS | 3379 |
| TR                                            | A0A0U1WHG0 A0A0U1WHG0_CVHSA | CLLRLKVDTSNPKTPKYKFVRIQPGQTFSSLVACYNGSPSGVYQCAMRPNHTIKGSFLNGS | 3379 |
| TR                                            | A0A166ZL34 A0A166ZL34_9NIDO | CLLRLKVDTSNPKTPKYKFVRIQPGQTFSSLVACYNGSPSGVYQCAMRPNHTIKGSFLNGS | 3186 |
| TR                                            | R9QTB2 R9QTB2_CVHSA         | CLLRLKVDTSNPKTPKYKFVRIQPGQTFSSLVACYNGSPSGVYQCAMRPNHTIKGSFLNGS | 3376 |
| TR                                            | R9QTH2 R9QTH2_CVHSA         | CLLRLKVDTSNPKTPKYKFVRIQPGQTFSSLVACYNGSPSGVYQCAMRPNHTIKGSFLNGS | 3385 |
| SP                                            | P0C6U8 R1A_CVHSA            | CLLRLKVDTSNPKTPKYKFVRIQPGQTFSSLVACYNGSPSGVYQCAMRPNHTIKGSFLNGS | 3384 |
| TR                                            | Q6JH47 Q6JH47_CVHSA         | CLLRLKVDTSNPKTPKYKFVRIQPGQTFSSLVACYNGSPSGVYQCAMRPNHTIKGSFLNGS | 3384 |
| TR                                            | Q692E5 Q692E5_CVHSA         | CLLRLKVDTSNPKTPKYKFVRIQPGQTFSSLVACYNGSPSGVYQCAMRPNHTIKGSFLNGS | 3384 |
| SP                                            | P0C6F8 R1A_BCHK3            | CLLRLKVDTSNPKTPKYKFVRIQPGQTFSSLVACYNGSPSGVYQCAMRPNHTIKGSFLNGS | 3378 |
| TR                                            | A0A0K1Z0N1 A0A0K1Z0N1_CVHSA | CLLRLKVDTSNPKTPKYKFVRIQPGQTFSSLVACYNGSPSGVYQCAMRPNHTIKGSFLNGS | 3384 |
| SP                                            | P0C6F5 R1A_BC279            | CLLRLKVDTSNPKTPKYKFVRIQPGQTFSSLVACYNGSPSGVYQCAMRPNHTIKGSFLNGS | 3390 |
| SP                                            | P0C6T7 R1A_BCRP3            | CLLRLKVDTSNPKTPKYKFVRIQPGQTFSSLVACYNGSPSGVYQCAMRPNHTIKGSFLNGS | 3382 |
| *:*:*****:*****:*****:*****:*****:*****:***** |                             |                                                               |      |

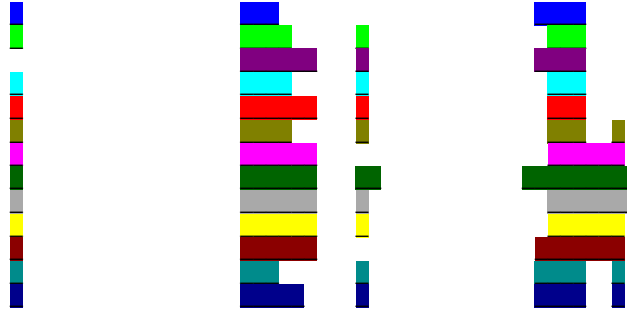

QHN73794  
SP |P0C6X7| R1AB\_CVHSA CGSVGFNIDYDCVSFCYMHHMELPTGVHAGTDLEGKFYGPFFVDRQTAQAAGDTTITLVN 3467  
TR |Q6UZF5| Q6UZF5\_CVHSA CGSVGFNIDYDCVSFCYMHHMELPTGVHAGTDLEGKFYGPFFVDRQTAQAAGDTTITLVN 3444  
TR |Q6UZF1| Q6UZF1\_CVHSA CGSVGFNIDYDCVSFCYMHHMELPTGVHAGTDLEGKFYGPFFVDRQTAQAAGDTTITLVN 3444  
TR |Q6JH48| Q6JH48\_CVHSA CGSVGFNIDYDCVSFCYMHHMELPTGVHAGTDLEGKFYGPFFVDRQTAQAAGDTTITLVN 3444  
TR |Q692E6| Q692E6\_CVHSA CGSVGFNIDYDCVSFCYMHHMELPTGVHAGTDLEGKFYGPFFVDRQTAQAAGDTTITLVN 3444  
TR |A0A0K1YZY7| A0A0K1YZY7\_CVHSA CGSVGFNIDYDCVSFCYMHHMELPTGVHAGTDLEGKFYGPFFVDRQTAQAAGDTTITLVN 3444  
SP |P0C6W2| R1AB\_BCHK3 CGSVGFNIDYDCVSFCYMHHMELPTGVHAGTDLEGKFYGPFFVDRQTAQAAGDTTITLVN 3438  
SP |P0C6W6| R1AB\_BCRP3 CGSVGFNIDYDCVSFCYMHHMELPTEVHAGTDLEGKFYGPFFVDRQTAQAAGDTTITLVN 3442  
SP |P0C6V9| R1AB\_BC279 CGSVGFNIDYDCVSFCYMHHMELPTGVHAGTDLEGKFYGPFFVDRQTAQAAGDTTITLVN 3450  
TR |A0A0U1WHI4| A0A0U1WHI4\_CVHSA CGSVGFNIDYDCVSFCYMHHMELPTGVHAGTDLEGKFYGPFFVDRQTAQAAGDTTITLVN 3439  
TR |A0A0U1WHG0| A0A0U1WHG0\_CVHSA CGSVGFNIDYDCVSFCYMHHMELPTGVHAGTDLEGKFYGPFFVDRQTAQAAGDTTITLVN 3439  
TR |A0A166ZL34| A0A166ZL34\_9NIDO CGSVGFNIDYDCVSFCYMHHMELPTGVHAGTDLEGKFYGPFFVDRQTAQAAGDTTITLVN 3246  
TR |R9QTB2| R9QTB2\_CVHSA CGSVGFNIDYDCVSFCYMHHMELPTGVHAGTDLEGKFYGPFFVDRQTAQAAGDTTITLVN 3436  
TR |R9QTH2| R9QTH2\_CVHSA CGSVGFNIDYDCVSFCYMHHMELPTGVHAGTDLEGKFYGPFFVDRQTAQAAGDTTITLVN 3445  
SP |P0C6U8| R1A\_CVHSA CGSVGFNIDYDCVSFCYMHHMELPTGVHAGTDLEGKFYGPFFVDRQTAQAAGDTTITLVN 3444  
TR |Q6JH47| Q6JH47\_CVHSA CGSVGFNIDYDCVSFCYMHHMELPTGVHAGTDLEGKFYGPFFVDRQTAQAAGDTTITLVN 3444  
TR |Q692E5| Q692E5\_CVHSA CGSVGFNIDYDCVSFCYMHHMELPTGVHAGTDLEGKFYGPFFVDRQTAQAAGDTTITLVN 3444  
SP |P0C6F8| R1A\_BCHK3 CGSVGFNIDYDCVSFCYMHHMELPTGVHAGTDLEGKFYGPFFVDRQTAQAAGDTTITLVN 3438  
TR |A0A0K1Z0N1| A0A0K1Z0N1\_CVHSA CGSVGFNIDYDCVSFCYMHHMELPTGVHAGTDLEGKFYGPFFVDRQTAQAAGDTTITLVN 3444  
SP |P0C6F5| R1A\_BC279 CGSVGFNIDYDCVSFCYMHHMELPTGVHAGTDLEGKFYGPFFVDRQTAQAAGDTTITLVN 3450  
SP |P0C6T7| R1A\_BCRP3 CGSVGFNIDYDCVSFCYMHHMELPTEVHAGTDLEGKFYGPFFVDRQTAQAAGDTTITLVN 3442  
\*\*\*\*\*:\*\*\*\*\*:\*\*\*\*\*:\*\*\*\*\*:\*\*\*\*\*

QHN73794  
SP |P0C6X7| R1AB\_CVHSA LAWLYAAVINGDRWFLNRFTTTTLNDFNLVAMKYNIEPLTQDHVDILGPLSAQTGIAVLDM 3527  
TR |Q6UZF5| Q6UZF5\_CVHSA LAWLYAAVINGDRWFLNRFTTTTLNDFNLVAMKYNIEPLTQDHVDILGPLSAQTGIAVLDM 3504  
TR |Q6UZF1| Q6UZF1\_CVHSA LAWLYAAVINGDRWFLNRFTTTTLNDFNLVAMKYNIEPLTQDHVDILGPLSAQTGIAVLDM 3504  
TR |Q6JH48| Q6JH48\_CVHSA LAWLYAAVINGDRWFLNRFTTTTLNDFNLVAMKYNIEPLTQDHVDILGPLSAQTGIAVLDM 3504  
TR |Q692E6| Q692E6\_CVHSA LAWLYAAVINGDRWFLNRFTTTTLNDFNLVAMKYNIEPLTQDHVDILGPLSAQTGIAVLDM 3504  
TR |A0A0K1YZY7| A0A0K1YZY7\_CVHSA LAWLYAAVINGDRWFLNRFTTTTLNDFNLVAMKYNIEPLTQDHVDILGPLSAQTGIAVLDM 3504  
SP |P0C6W2| R1AB\_BCHK3 LAWLYAAVINGDRWFLNRFTTTTLNDFNLVAMKYNIEPLTQDHVDILGPLSAQTGIAVLDM 3498  
SP |P0C6W6| R1AB\_BCRP3 LAWLYAAVINGDRWFLNRFTTTTLNDFNLVAMKYNIEPLTQDHVDILGPLSAQTGIAVLDM 3502  
SP |P0C6V9| R1AB\_BC279 LAWLYAAVINGDRWFLNRFTTTTLNDFNLVAMKYNIEPLTQDHVDILGPLSAQTGIAVLDM 3510  
TR |A0A0U1WHI4| A0A0U1WHI4\_CVHSA LAWLYAAVINGDRWFLNRFTTTTLNDFNLVAMKYNIEPLTQDHVDILGPLSAQTGIAVLDM 3499  
TR |A0A0U1WHG0| A0A0U1WHG0\_CVHSA LAWLYAAVINGDRWFLNRFTTTTLNDFNLVAMKYNIEPLTQDHVDILGPLSAQTGIAVLDM 3499  
TR |A0A166ZL34| A0A166ZL34\_9NIDO LAWLYAAVINGDRWFLNRFTTTTLNDFNLVAMKYNIEPLTQDHVDILGPLSAQTGIAVLDM 3306  
TR |R9QTB2| R9QTB2\_CVHSA LAWLYAAVINGDRWFLNRFTTTTLNDFNLVAMKYNIEPLTQDHVDILGPLSAQTGIAVLDM 3496  
TR |R9QTH2| R9QTH2\_CVHSA LAWLYAAVINGDRWFLNRFTTTTLNDFNLVAMKYNIEPLTQDHVDILGPLSAQTGIAVLDM 3505  
SP |P0C6U8| R1A\_CVHSA LAWLYAAVINGDRWFLNRFTTTTLNDFNLVAMKYNIEPLTQDHVDILGPLSAQTGIAVLDM 3504  
TR |Q6JH47| Q6JH47\_CVHSA LAWLYAAVINGDRWFLNRFTTTTLNDFNLVAMKYNIEPLTQDHVDILGPLSAQTGIAVLDM 3504  
TR |Q692E5| Q692E5\_CVHSA LAWLYAAVINGDRWFLNRFTTTTLNDFNLVAMKYNIEPLTQDHVDILGPLSAQTGIAVLDM 3504  
SP |P0C6F8| R1A\_BCHK3 LAWLYAAVINGDRWFLNRFTTTTLNDFNLVAMKYNIEPLTQDHVDILGPLSAQTGIAVLDM 3498  
TR |A0A0K1Z0N1| A0A0K1Z0N1\_CVHSA LAWLYAAVINGDRWFLNRFTTTTLNDFNLVAMKYNIEPLTQDHVDILGPLSAQTGIAVLDM 3504  
SP |P0C6F5| R1A\_BC279 LAWLYAAVINGDRWFLNRFTTTTLNDFNLVAMKYNIEPLTQDHVDILGPLSAQTGIAVLDM 3510  
SP |P0C6T7| R1A\_BCRP3 LAWLYAAVINGDRWFLNRFTTTTLNDFNLVAMKYNIEPLTQDHVDILGPLSAQTGIAVLDM 3502  
\*\*\*\*\*:\*\*\*\*\*

|          |                             |                                                               |      |
|----------|-----------------------------|---------------------------------------------------------------|------|
| QHN73794 |                             | CASLKELLQNGMNGRTILGSALLEDEFTPFDDVVRQCSGVTFQSAVKRTIKGTHHWLLTI  | 3587 |
| SP       | P0C6X7 R1AB_CVHSA           | CAALKELLQNGMNGRTILGSTILEDEFTPFDDVVRQCSGVTFQGKFKKIVKGTHHWMLLTF | 3564 |
| TR       | Q6UZF5 Q6UZF5_CVHSA         | CAALKELLQNGMNGRTILGSTILEDEFTPFDDVVRQCSGVTFQGKFKKIVKGTHHWMLLTF | 3564 |
| TR       | Q6UZF1 Q6UZF1_CVHSA         | CAALKELLQNGMNGRTILGSTILEDEFTPFDDVVRQCSGVTFQGKFKKIVKGTHHWMLLTF | 3564 |
| TR       | Q6JH48 Q6JH48_CVHSA         | CAALKELLQNGMNGRTILGSTILEDEFTPFDDVVRQCSGVTFQGKFKKIVKGTHHWMLLTF | 3564 |
| TR       | Q692E6 Q692E6_CVHSA         | CAALKELLQNGMNGRTILGSTILEDEFTPFDDVVRQCSGVTFQGKFKKIVKGTHHWMLLTF | 3564 |
| TR       | A0A0K1YZY7 A0A0K1YZY7_CVHSA | CAALKELLQNGMNGRTILGSTILEDEFTPFDDVVRQCSGVTFQGKFKKIVKGTHHWMLLTF | 3564 |
| SP       | P0C6W2 R1AB_BCHK3           | CAALKELLQNGMNGRTILGSTILEDEFTPFDDVVRQCSGVTFQGKFKKIVKGTHHWMLLTF | 3558 |
| SP       | P0C6W6 R1AB_BCRP3           | CAALKELLQNGMNGRTILGSTILEDEFTPFDDVVRQCSGVTFQGKFKKIVKGTHHWMLLTF | 3562 |
| SP       | P0C6V9 R1AB_BC279           | CAALKELLQNGMNGRTILGSTILEDEFTPFDDVVRQCSGVTFQGKFKKIVKGTHHWMLLTF | 3570 |
| TR       | A0A0U1WHI4 A0A0U1WHI4_CVHSA | CAALKELLQNGMNGRTILGSTILEDEFTPFDDVVRQCSGVTFQGKFKKIVKGTHHWMLLTF | 3559 |
| TR       | A0A0U1WHG0 A0A0U1WHG0_CVHSA | CAALKELLQNGMNGRTILGSTILEDEFTPFDDVVRQCSGVTFQGKFKKIVKGTHHWMLLTF | 3559 |
| TR       | A0A166ZL34 A0A166ZL34_9NIDO | CAALKELLQNGMNGRTILGSTILEDEFTPFDDVVRQCSGVTFQGKFKKIVKGTHHWMLLTF | 3366 |
| TR       | R9QTB2 R9QTB2_CVHSA         | CAALKELLQNGMNGRTILGSTILEDEFTPFDDVVRQCSGVTFQGKFKKIVKGTHHWMLLTF | 3556 |
| TR       | R9QTH2 R9QTH2_CVHSA         | CAALKELLQNGMNGRTILGSTILEDEFTPFDDVVRQCSGVTFQGKFKKIVKGTHHWMLLTF | 3565 |
| SP       | P0C6U8 R1A_CVHSA            | CAALKELLQNGMNGRTILGSTILEDEFTPFDDVVRQCSGVTFQGKFKKIVKGTHHWMLLTF | 3564 |
| TR       | Q6JH47 Q6JH47_CVHSA         | CAALKELLQNGMNGRTILGSTILEDEFTPFDDVVRQCSGVTFQGKFKKIVKGTHHWMLLTF | 3564 |
| TR       | Q692E5 Q692E5_CVHSA         | CAALKELLQNGMNGRTILGSTILEDEFTPFDDVVRQCSGVTFQGKFKKIVKGTHHWMLLTF | 3564 |
| SP       | P0C6F8 R1A_BCHK3            | CAALKELLQNGMNGRTILGSTILEDEFTPFDDVVRQCSGVTFQGKFKKIVKGTHHWMLLTF | 3558 |
| TR       | A0A0K1Z0N1 A0A0K1Z0N1_CVHSA | CAALKELLQNGMNGRTILGSTILEDEFTPFDDVVRQCSGVTFQGKFKKIVKGTHHWMLLTF | 3564 |
| SP       | P0C6F5 R1A_BC279            | CAALKELLQNGMNGRTILGSTILEDEFTPFDDVVRQCSGVTFQGKFKKIVKGTHHWMLLTF | 3570 |
| SP       | P0C6T7 R1A_BCRP3            | CAALKELLQNGMNGRTILGSTILEDEFTPFDDVVRQCSGVTFQGKFKKIVKGTHHWMLLTF | 3562 |

\*\*:\*\*\*\*\*:\*\*\*\*\*.\*:\*\*\*\*\*:\*\*\*:
